# Supplementary material for: Barriers and facilitators to deprescribing of cardiovascular medications: a systematic review
Source: PubMed Central journal article supplement — BMJ Open. 2022 Dec 22;12(12):e061686. doi: 10.1136/bmjopen-2022-061686 (PMC9791375; doi:10.1136/bmjopen-2022-061686), 2022-12-22
Supplement: bmjopen-2022-061686.draft_revisions.pdf [file bmjopen-2022-061686.draft_revisions.pdf]

# BMJ Open

BMJ Open is committed to open peer review. As part of this commitment we make the peer review history of every article we publish publicly available.

When an article is published we post the peer reviewers' comments and the authors' responses online. We also post the versions of the paper that were used during peer review. These are the versions that the peer review comments apply to.

The versions of the paper that follow are the versions that were submitted during the peer review process. They are not the versions of record or the final published versions. They should not be cited or distributed as the published version of this manuscript.

BMJ Open is an open access journal and the full, final, typeset and author-corrected version of record of the manuscript is available on our site with no access controls, subscription charges or pay-per-view fees (<http://bmjopen.bmj.com>).

If you have any questions on BMJ Open's open peer review process please email [info.bmjopen@bmj.com](mailto:info.bmjopen@bmj.com)

# BMJ Open

## Barriers and facilitators to deprescribing of cardiovascular medications: a systematic review

|                               |                                                                                                                                                                                                                                                                                                                                                            |
|-------------------------------|------------------------------------------------------------------------------------------------------------------------------------------------------------------------------------------------------------------------------------------------------------------------------------------------------------------------------------------------------------|
| Journal:                      | <i>BMJ Open</i>                                                                                                                                                                                                                                                                                                                                            |
| Manuscript ID                 | bmjopen-2022-061686                                                                                                                                                                                                                                                                                                                                        |
| Article Type:                 | Original research                                                                                                                                                                                                                                                                                                                                          |
| Date Submitted by the Author: | 08-Feb-2022                                                                                                                                                                                                                                                                                                                                                |
| Complete List of Authors:     | Brunner, Laureline; University of Bern, Institute for Primary Health Care (BIHAM)<br>Rodondi, Nicolas; Inselspital Universitatsspital Bern; University of Bern, Institute of Primary Health Care (BIHAM)<br>Aubert, Carole; Inselspital University Hospital Bern, General Internal Medicine; University of Bern, Institute for Primary Health Care (BIHAM) |
| Keywords:                     | Adult cardiology < CARDIOLOGY, GERIATRIC MEDICINE, PRIMARY CARE, QUALITATIVE RESEARCH, VASCULAR MEDICINE                                                                                                                                                                                                                                                   |
|                               |                                                                                                                                                                                                                                                                                                                                                            |

SCHOLARONE™  
Manuscripts

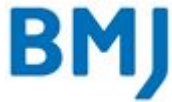

I, the Submitting Author has the right to grant and does grant on behalf of all authors of the Work (as defined in the below author licence), an exclusive licence and/or a non-exclusive licence for contributions from authors who are: i) UK Crown employees; ii) where BMJ has agreed a CC-BY licence shall apply, and/or iii) in accordance with the terms applicable for US Federal Government officers or employees acting as part of their official duties; on a worldwide, perpetual, irrevocable, royalty-free basis to BMJ Publishing Group Ltd ("BMJ") its licensees and where the relevant Journal is co-owned by BMJ to the co-owners of the Journal, to publish the Work in this journal and any other BMJ products and to exploit all rights, as set out in our [licence](#).

The Submitting Author accepts and understands that any supply made under these terms is made by BMJ to the Submitting Author unless you are acting as an employee on behalf of your employer or a postgraduate student of an affiliated institution which is paying any applicable article publishing charge ("APC") for Open Access articles. Where the Submitting Author wishes to make the Work available on an Open Access basis (and intends to pay the relevant APC), the terms of reuse of such Open Access shall be governed by a Creative Commons licence – details of these licences and which [Creative Commons](#) licence will apply to this Work are set out in our licence referred to above.

Other than as permitted in any relevant BMJ Author's Self Archiving Policies, I confirm this Work has not been accepted for publication elsewhere, is not being considered for publication elsewhere and does not duplicate material already published. I confirm all authors consent to publication of this Work and authorise the granting of this licence.

# Barriers and facilitators to deprescribing of cardiovascular medications: a systematic review

Laureline Brunner,<sup>1</sup> Nicolas Rodondi, MD, MAS,<sup>1,2</sup> Carole Elodie Aubert, MD, MSc,<sup>1,2</sup>

<sup>1</sup> Institute of Primary Health Care (BIHAM), University of Bern, Bern, Switzerland ;

<sup>2</sup> Department of General Internal Medicine, Inselspital, Bern University Hospital, University of Bern, Bern, Switzerland

Running title: Deprescribing cardiovascular medications

Corresponding author:

Carole E. Aubert, Department of General Internal Medicine, Inselspital, Bern University Hospital, University of Bern, Freiburgstrasse, CH-3010 Bern, Switzerland.  
carole.aubert@biham.unibe.ch

Number of tables and figures: 5

Abstract word count: 208

Word count: 3,318

1  
2  
3 29 **ABSTRACT**  
4

5 30 **Objective:** To synthesize the current knowledge on barriers and facilitators to deprescribing  
6  
7 31 cardiovascular medications (CVMs) at the levels of patients, informal caregivers, and  
8  
9 32 healthcare providers (HCPs).  
10

11  
12 33 **Design/Setting:** We conducted a systematic review of studies exploring/assessing patient,  
13  
14 34 informal caregiver and/or HCP barriers and/or facilitators to deprescribing CVMs.  
15

16  
17 35 **Data sources:** Ovid/MEDLINE and Embase from January 2003 to November 2021.  
18

19 36 **Data extraction and synthesis:** We performed a deductive thematic analysis based on the  
20  
21 37 framework of specific barriers and facilitators to deprescribing CVMs created by Goyal et al.  
22

23 38 **Results:** Important deprescribing barriers for patients, informal caregivers and HCPs included  
24  
25 39 uncertainty due to lack of evidence regarding CVM deprescribing, fear of negative  
26  
27 40 consequences following deprescribing, and time constraints. An important facilitator to  
28  
29 41 deprescribing for patients and HCPs was the occurrence of ADEs. Other facilitators for patients  
30  
31 42 were dislike of CVMs or establishment of a deprescribing plan. Necessity and benefit of CVMs  
32  
33 43 were seen as barriers or facilitators similarly by patients and HCPs. Social influences and  
34  
35 44 patient ambivalence acted both as barriers and facilitators to deprescribing.  
36  
37  
38

39  
40 45 **Conclusion:** The differences in patient, informal caregiver and HCP regarding barriers and  
41  
42 46 facilitators to deprescribing CVMs stress the need for ground discussions about beliefs and  
43  
44 47 preferences of each stakeholder implicated in deprescribing decisions.  
45

46  
47 48 **Review registration on Prospero:** CRD42020221973  
48  
49  
50

51  
52

53  
54

55  
56

57  
58

59  
60

60

1  
2  
3 55 Strengths and limitations of this study:  
4

- 5 56 • Systematic review process with publication review; data extraction, analysis and  
6  
7  
8 57 synthesis; and quality assessment independently conducted by two independent  
9  
10 58 reviewers.  
11  
12 59 • Assessment of both quantitative and qualitative studies, providing complementary  
13  
14 60 information on barriers and facilitators to deprescribing.  
15  
16  
17 61 • In some studies, cardiovascular medications were part of, but not the focus of the  
18  
19 62 medications evaluated.  
20  
21  
22 63 • We did not assess specific classes of cardiovascular medications.  
23  
24 64

25  
26 65 Key words: cardiovascular medication, deprescribing, barriers, facilitators, older people  
27  
28  
29 66  
30  
31 67  
32  
33 68  
34  
35 69  
36  
37  
38 70  
39  
40  
41  
42  
43  
44  
45  
46  
47  
48  
49  
50  
51  
52  
53  
54  
55  
56  
57  
58  
59  
60

## 71 1. Introduction

72 In recent years, a less-is-more attitude regarding medication use has pushed to reevaluate the  
73 balance between medication risks and benefits<sup>(1)</sup>. In this context, the notion of *deprescribing*  
74 emerged, which is defined as the “systematic process of identifying and discontinuing  
75 [medications] in instances in which existing or potential harms outweigh existing or potential  
76 benefits within the context of an individual patient’s care goals, current level of functioning,  
77 life expectancy, values and preferences”<sup>(2)</sup>.

78 Cardiovascular medications (CVMs) belong to the most prescribed medications worldwide<sup>(3)</sup>.  
79 Although their use is beneficial in many cases, CVMs can also cause significant adverse drug  
80 events (ADEs), drug-drug, and drug-disease interactions <sup>(4-6)</sup>. However, the lack of evidence  
81 regarding benefits and risks of some CVMs in primary prevention in older people or in those  
82 with limited life expectancy, may lead to insecurity of patients and prescribers regarding CVM  
83 use and deprescribing<sup>(1, 7-12)</sup>.

84 In this context, the decision to deprescribe a CVM often becomes a preference-sensitive  
85 decision<sup>(13, 14)</sup>. A better understanding of barriers and facilitators experienced by all  
86 stakeholders involved in decision-making regarding CVM deprescribing may help to take  
87 informed decisions in line with individual values and preferences, and increase confidence in  
88 the decision made<sup>(15, 16)</sup>. While literature exists on deprescribing general medications, we do not  
89 know if barriers and facilitators differ for deprescribing CVMs.

90 With this systematic review, we aimed at synthesizing the current knowledge on barriers and  
91 facilitators to deprescribing CVMs at the levels of patients, informal caregivers, and healthcare  
92 providers (HCPs).

93

94

95

96

## 97 2. Methods

98 We conducted a systematic review of studies assessing barriers and/or facilitators to  
99 deprescribing CVMs in adults. The review was registered on Prospero (CRD42020221973).

100

### 101 2.1. Ethics approval

102 An ethics approval was not needed for this study, since it was a review of the literature.

103

### 104 2.2. Types of studies and inclusion criteria

105 We included any type of publication – except editorials, conference abstracts and study  
106 protocols – discussing stakeholder barriers and/or facilitators regarding the process of  
107 deprescribing CVMs. Studies on prescribing, use, or adherence were not included. Studies  
108 reporting patients stopping CVMs without previous discussion with HCPs were considered as  
109 non-adherence studies and excluded.

110

### 111 2.3. Search strategy

112 We searched Ovid/MEDLINE and Embase from January 2003 to November 2021. We started  
113 the search in 2003 because it corresponds to the first mention of the term *deprescribing* in the  
114 literature<sup>(17)</sup>. We included studies published in English language and focusing on patients taking  
115 or having taken CVMs previously, and/or informal caregivers, and/or HCPs of such patients.  
116 We developed the 3 following concepts for our search strategy: 1) CVMs; 2) deprescribing; 3)  
117 barriers and facilitators. All three concepts were combined with the operator “and”. The detailed  
118 search strategy is provided in **Supplemental Text S1**.

119 LB and CEA independently reviewed all publications identified through the search strategy  
120 after removing duplicates. First, ineligible articles were excluded based on title/abstract.  
121 Second, full text of the remaining articles was reviewed to identify eligible studies. Reference  
122 lists of included publications were also searched for additional relevant articles (hand



1  
2  
3 123 searching). Reviews and meta-analyses were kept in the first selection, but only original studies  
4  
5 124 identified in the reference lists were included. For each step, LB and CEA resolved  
6  
7  
8 125 discrepancies by discussion.  
9

10 126

#### 11 12 127 2.4. Data extraction and analysis

13  
14 128 Eligible articles were imported in MAXQDA 2020 data analysis software (VERBI Software,  
15  
16  
17 129 Berlin, Germany). Extracted data included author(s), year of publication, country, study design,  
18  
19 130 setting, and population, and details on barriers and/or facilitators. Given the topic of this  
20  
21 131 systematic review, we conducted a qualitative rather than a quantitative synthesis of the results.  
22  
23 132 We performed a deductive thematic analysis to identify common and discrepant themes within  
24  
25 133 and between stakeholder categories<sup>(18, 19)</sup>. The thematic analysis was based on the framework  
26  
27 134 of specific barriers and facilitators to deprescribing CVMs created by Goyal et al.<sup>(4)</sup>. This  
28  
29 135 framework, based on Reeve's framework of patient barriers and facilitators to deprescribing  
30  
31 136 medications<sup>(20)</sup>, includes the following categories: appropriateness of cessation, process of  
32  
33 137 cessation, dislike of medications, fear, uncertainty, and conflicting attitudes. We analyzed  
34  
35 138 patient and informal caregiver outputs together and HCP outputs separately, since we expected  
36  
37 139 to identify different barriers and facilitators. In an iterative process, we created themes within  
38  
39  
40 140 the predefined categories.  
41  
42  
43  
44  
45

46 141

#### 47 142 2.5. Risk of bias and quality assessment

48  
49 143 LB and CA conducted the quality and risk of bias assessment separately using the Mixed  
50  
51 144 Methods Appraisal Tool (MMAT) 2018<sup>(21, 22)</sup>. The MMAT allows assessing the methodological  
52  
53 145 quality of studies included in a systematic review encompassing both qualitative and  
54  
55 146 quantitative data. Discussions were held until a consensus on quality of each study was reached.  
56  
57

58 147

#### 59 60 148 2.6. Patient and Public Involvement:

1  
2  
3 149 Patients and Public were not involved in the design, conduct or reporting of this review, but in  
4  
5 150 a follow-up project based on this review.  
6  
7  
8 151

9  
10 152 **3. Results**

11  
12 153 3.1. Study selection and characteristics

13  
14 154 Among the 4,164 unique studies identified, 71 were included for full-text assessment (**Figure**  
15  
16 155 **1**). Among those, 16 fulfilled inclusion criteria. Through hand-searching, six additional studies  
17  
18 156 were included, leading to a total of 22 publications. Study characteristics are presented in  
19  
20 157 **Tables 1-3** and detailed in **Supplemental Table S1**.

21  
22  
23  
24 158 **Table 1: Principal characteristics of studies including patients and/or informal caregivers**

| First author, publication year              | N population                        | Age                  | Studied CVM(s)                            | Prevention type     |
|---------------------------------------------|-------------------------------------|----------------------|-------------------------------------------|---------------------|
| Benson, 2005 (UK) <sup>(25)</sup>           | 38 patients                         | Any                  | Antihypertensives                         | Unknown             |
| Brinton, 2018 (USA) <sup>(42)</sup>         | 5,014 patients                      | Mean age: 64 years   | Statin                                    | Primary & secondary |
| Crutzen, 2020 (Netherlands) <sup>(26)</sup> | 17 patients<br>1 informal caregiver | Median age: 78 years | Cardiometabolic medication                | Primary & secondary |
| Goyal, 2020 (USA) <sup>(4)</sup>            | 10 patients                         | Median age: 80 years | $\beta$ -blockers                         | Primary & secondary |
| Jansen, 2019 (Australia) <sup>(28)</sup>    | 30 patients                         | $\geq 75$ years      | Preventive cardiovascular medication      | Primary & secondary |
| Luymes, 2017 (Netherlands) <sup>(43)</sup>  | 33 patients                         | Mean age: 57 years   | Lipid-lowering drugs<br>Antihypertensives | Primary             |

|                                                   |                                          |                                                             |                                                                                                |                        |
|---------------------------------------------------|------------------------------------------|-------------------------------------------------------------|------------------------------------------------------------------------------------------------|------------------------|
| Pickering, 2020<br>(USA) <sup>(31)</sup>          | 16 patients<br>17 informal<br>caregivers | Patients $\geq$<br>65 years<br>Caregivers<br>22-69<br>years | Unspecified<br>(identified: statins,<br>antihypertensives,<br>antiplatelets,<br>antidiabetics) | Primary &<br>secondary |
| Qi, 2015<br>(Australia) <sup>(39)</sup>           | 180 patients                             | Median<br>age: 78<br>years                                  | Regular<br>medications<br>Statins                                                              | Primary &<br>secondary |
| Tija, 2017<br>(USA) <sup>(40)</sup>               | 297 patients                             | Mean age:<br>72 years                                       | Statin                                                                                         | Primary &<br>secondary |
| Van Bussel, 2019<br>(Netherlands) <sup>(34)</sup> | 15 patients                              | Mean age:<br>81 years                                       | Antihypertensives                                                                              | Primary                |

159 **Abbreviations:** CVM, cardiovascular medication.

160 **Table 2: Main characteristics of studies including HCPs**

| First author                                     | N population | Characteristics of patients cared by study<br>HCPs |                                                                                                  |                    |
|--------------------------------------------------|--------------|----------------------------------------------------|--------------------------------------------------------------------------------------------------|--------------------|
|                                                  |              | Age                                                | Studied CVM(s)                                                                                   | Prevention<br>type |
| Ailabouni, 2016<br>(New Zealand) <sup>(36)</sup> | 10 GPs       | 83 years                                           | Antiplatelets,<br>statin,<br>antidiabetics,<br>diuretics, $\beta$ -<br>blocker, ACE<br>inhibitor | Secondary          |
| Ailabouni, 2016<br>(New Zealand) <sup>(23)</sup> | 10 GPs       | Unspecifie<br>d<br>(older<br>patients)             | Unspecified<br>(identified: statin<br>and aspirin)                                               | Unknown            |

|                                                       |                                                                    |                                        |                                                                                |                          |
|-------------------------------------------------------|--------------------------------------------------------------------|----------------------------------------|--------------------------------------------------------------------------------|--------------------------|
| Anderson, 2017<br>(Australia) <sup>(24)</sup>         | 32 GPs<br>15 CPs                                                   | Unknown                                | Unspecified<br>(identified: statin)                                            | Unknown                  |
| Geijteman, 2018<br>(Netherlands) <sup>(38)</sup>      | 174 GPs<br>147 clinical<br>specialists                             | 88 years                               | ACE inhibitor,<br>statin,<br>anticoagulant,<br>diuretic,<br>antidiabetic       | Secondary                |
| Goyal, 2020<br>(USA) <sup>(37)</sup>                  | 184 geriatricians<br>182 general<br>internists<br>87 cardiologists | 79 years                               | 4 cardiovascular<br>medications                                                | Unknown                  |
| Green, 2019<br>(USA) <sup>(29)</sup>                  | 19 physicians<br>2 nurse<br>practitioners                          | Unspecifie<br>d<br>(older<br>patients) | Unspecified<br>(identified: statins,<br>oral anticoagulants,<br>antidiabetics) | Unknown                  |
| Jansen, 2017<br>(Australia) <sup>(27)</sup>           | 25 GPs                                                             | ≥75 years                              | Preventive CV<br>medication                                                    | Primary                  |
| Thompson, 2020<br>(Denmark) <sup>(32)</sup>           | 11 GPs                                                             | ≥ 80 years                             | Statin                                                                         | Unknown                  |
| Van Middelaar, 2020<br>(Netherlands) <sup>(35)</sup>  | 15 GPs                                                             | Unspecifie<br>d<br>(older<br>patients) | Antihypertensives                                                              | Unknown                  |
| Van der Ploeg, 2018<br>(30 countries) <sup>(41)</sup> | 2250 GPs                                                           | ≥ 80 years                             | Statin                                                                         | Primary and<br>secondary |

161

162 **Abbreviations:** ACE inhibitor, angiotensin-converting enzyme inhibitor; CVM,  
163 cardiovascular medication; GP, general practitioner.

164

165 **Table 3: Main characteristics of studies including HCPs and patients and/or informal**  
 166 **caregivers**

| First author                                  | N population                                                                                                 | Patients' characteristics  |                                                                                        |                 |
|-----------------------------------------------|--------------------------------------------------------------------------------------------------------------|----------------------------|----------------------------------------------------------------------------------------|-----------------|
|                                               |                                                                                                              | Age                        | Studied CVM(s)                                                                         | Prevention type |
| Luymes, 2016<br>(Netherlands) <sup>(30)</sup> | 10 GPs<br>49 patients                                                                                        | Median<br>age: 55<br>years | Antihypertensives,<br>lipid-lowering<br>drugs                                          | Primary         |
| Todd, 2016<br>(UK) <sup>(33)</sup>            | 12 patients<br>12 informal<br>caregivers<br>3 palliative<br>consultants<br>3 nurse<br>practitioners<br>6 GPs | Any                        | Unspecified<br>(preventive<br>medications,<br>including statins,<br>antihypertensives) | Unknown         |

167 **Abbreviations:** CVM, cardiovascular medication; GP, general practitioner.

168

### 169 3.2. Quality assessment

170 Details of each study quality assessment can be found in **Supplemental Table S2**. Of the 15  
 171 qualitative studies included in this systematic review, 14 were deemed of good quality<sup>(4, 23-35)</sup>,  
 172 while one lacked data to support interpretation of the results<sup>(36)</sup>. Five of the six included  
 173 quantitative studies did not provide sample representative of the target population, as  
 174 nonresponse was high, increasing the risk of nonresponse bias<sup>(37-41)</sup>. The sixth quantitative study  
 175 provided few details on the method used for data analysis<sup>(42)</sup>. The only mixed methods study  
 176 included failed to address divergences between quantitative and qualitative results<sup>(43)</sup>. We did  
 177 not exclude any study based on the quality assessment, as our aim was to describe all available  
 178 data regarding barriers and facilitators to deprescribing CVMs.

179

### 180 3.3. Thematic analysis

181 Following the framework of Goyal et al.<sup>(4)</sup>, seven categories were created to describe patient  
 182 and HCP main barriers and facilitators to deprescribing CVMs. Categories one and four were  
 183 divided into three and two themes respectively. Differences between patients, informal  
 184 caregivers and HCPs, as well as across HCP categories, are highlighted when relevant. HCPs  
 185 other than general practitioners (GPs, including general internists and family medicine  
 186 clinicians) are regrouped under the term “specialists”. Differences across specialties are  
 187 highlighted when relevant. Barriers and facilitators did not appear to differ significantly  
 188 between studies assessing different CVMs.

#### 190 **3.3.1. Appropriateness**

191 Patient and HCP agreement or disagreement with appropriateness of CVM deprescribing were  
 192 based on three main themes: CVM necessity, CVM benefit, and ADE occurrence. All barriers  
 193 and facilitators according to categories, themes and stakeholders, are displayed in **Table 4** and  
 194 detailed in **Supplementary Table S3**.

196 **Table 4: Summary of categories, themes and codes of barriers and facilitators to**  
 197 **deprescribing CVMs**

|  |                               |      |     |
|--|-------------------------------|------|-----|
|  | Patients /informal caregivers | HCPs | All |
|--|-------------------------------|------|-----|

|                 |                                                                                                                                                                            |                                                                                                                                                                     |                                                                                                                                                                      |
|-----------------|----------------------------------------------------------------------------------------------------------------------------------------------------------------------------|---------------------------------------------------------------------------------------------------------------------------------------------------------------------|----------------------------------------------------------------------------------------------------------------------------------------------------------------------|
| Appropriateness | CVM linked to survival, ADEs foster deprescribing discussion with HCP<br><i>Low CV risk, disease under control, robustness, ADEs balanced against reasons to take CVMs</i> | Unhealthy lifestyle, many CVRFs<br><i>Primary prevention, age as single CVRF, short life expectancy, cognitive impairment, nursing home / palliative care, ADEs</i> | Past CV event, family history of CVD, CVM should be taken until end of life, no ADE No improvement under CVM, no symptom from disease, reduction in QOL through ADEs |
| Fear            | Fear of CV event & becoming a burden<br><i>Fear of ADEs, of becoming dependent on CVMs</i>                                                                                 | Feeling of giving up on patients                                                                                                                                    | Fear of CV event, return of previous condition, health deterioration, shorter lifespan                                                                               |
| Dislike         | <i>Medication dislike, costs, living a long life without using CVMs, pride in not taking medications, CVMs = poison / bad for health, therapeutic competition</i>          |                                                                                                                                                                     |                                                                                                                                                                      |
| Influences      | <b>HCP (especially GP) advice</b>                                                                                                                                          | <b>Patient's preferences</b><br>Patient's lack of understanding; patient's family wants CVMs; specialist prescription; interference with other HCPs' treatment plan | <b>Previous experience with deprescribing</b><br><i>(QOL improvement, no stroke, restart medication, stroke)</i>                                                     |
| Process         | <i>Deprescribing trial with possibility of restarting</i>                                                                                                                  | Lack of remuneration for close monitoring                                                                                                                           | <i>Dose-lowering scheme; close monitoring</i><br>Time constraints                                                                                                    |

|             |                                                                                                                                 |                                                                                                                                  |                                                                                                        |
|-------------|---------------------------------------------------------------------------------------------------------------------------------|----------------------------------------------------------------------------------------------------------------------------------|--------------------------------------------------------------------------------------------------------|
| Uncertainty | Lack of understanding of CVDs and risk reduction with CVMs; uncertainty about risks and benefits; conflicting treatment targets | Lack of evidence on deprescribing, uncertainty about when to deprescribe / risk-benefit ratio. Limited training on deprescribing | Unknown consequences of deprescribing<br><i>Uncertainty about possible consequences of taking CVMs</i> |
| Ambivalence | Concern about CVM effect on health vs consequences of not taking CVMs<br>Aversion towards CVMs vs obligation to take CVMs       |                                                                                                                                  |                                                                                                        |

199 **Abbreviations:** ADE, adverse drug event; CV, cardiovascular; CVD, cardiovascular disease; CVM, cardiovascular medication; CVRF, cardiovascular risk factor; GP, general practitioner; HCP, healthcare provider; QOL, quality of life.

202 **Legend:** Categories are displayed in the first column. Barriers are displayed in normal character, facilitators in italics, and items that can act both as barrier or facilitator in bold.

205 **3.3.1.1 Necessity**

206 Some patients considered taking CVMs as a necessity, even an obligation, especially in case of  
 207 past cardiovascular (CV) event or family history of cardiovascular disease (CVD)<sup>(28, 30, 43)</sup>. This  
 208 view was shared by GPs, who also deemed necessary to treat patients with unhealthy lifestyle,  
 209 or presenting many cardiovascular risk factors (CVRF)<sup>(30, 35)</sup>. Many patients and one GP even  
 210 stated that CVMs should not be stopped until the end of life<sup>(28, 32, 33, 40)</sup>, while some patients  
 211 considered CVMs linked to their survival<sup>(4)</sup>. Contrastively, patients at low CV risk and GPs  
 212 treating patients in primary prevention or patients without any CVRF other than age, considered  
 213 CVMs less necessary<sup>(27, 30, 41, 43)</sup>. Some patients questioned the continuous necessity of their  
 214 CVM, as they felt that their disease was well-controlled<sup>(30, 34)</sup>.

216 **3.3.1.2 Benefit**



1  
2  
3 217 GPs were more inclined to continue treating patients with good physical and cognitive function  
4  
5 218 or few comorbidities, especially if they presented no CVM-related ADEs, expecting them to  
6  
7 219 derive a higher benefit from CVMs<sup>(24, 27, 32, 35, 36)</sup>. In contrast, GPs and specialists considered  
8  
9 220 patients with a short life expectancy, cognitive impairment, or living in palliative/nursing homes  
10  
11 221 less likely to benefit from CVMs<sup>(24, 27, 29, 32, 37, 38, 41)</sup>. They felt that, in these cases, prolonging  
12  
13 222 life or avoiding a CV event should not be the main objective of care<sup>(27)</sup>. However, frail patients  
14  
15 223 were less willing to stop their statin than robust ones<sup>(39)</sup>.  
16  
17 224 Some patients and informal caregivers also considered CVMs to be beneficial when they saw  
18  
19 225 an objective (e.g., cholesterol levels) or subjective (e.g., less dizziness) improvement under  
20  
21 226 treatment<sup>(4, 25, 26, 31)</sup>. Some patients also considered that taking CVMs enabled them to make an  
22  
23 227 active contribution to their health, and to have control over themselves and the future<sup>(44)</sup>.  
24  
25  
26  
27  
28  
29

### 30 229 **3.3.1.3 ADEs**

31  
32  
33 230 Patients, informal caregivers and HCPs reported ADEs as one of the main reasons to consider  
34  
35 231 stopping CVMs, especially if ADEs were associated with a reduction in quality of life<sup>(4, 24-26, 28,</sup>  
36  
37 232 <sup>31, 34-38, 42)</sup>. Patients usually compliant with medications considered ADEs as a reason to discuss  
38  
39 233 deprescribing with their GP<sup>(28, 34)</sup>. Patients considering taking CVMs as a routine to stay healthy  
40  
41 234 were still willing to discontinue their CVMs in case of ADEs<sup>(28, 34)</sup>. Contrastively, some patients  
42  
43 235 continued taking their CVMs after balancing ADEs against reasons to take CVMs (i.e., CVM  
44  
45 236 perceived benefit, minor ADEs<sup>(25)</sup>). When patients were asymptomatic and had no ADE, patients  
46  
47 237 and GPs were unwilling to deprescribe CVMs<sup>(34, 35)</sup>. When ADEs occurred in patients with  
48  
49 238 CVD, GPs were also unwilling to deprescribe<sup>(41)</sup>.  
50  
51  
52  
53

### 54 239 55 240 **3.2. Fear**

56  
57 241 Fear of consequences following CVM deprescribing was an important barrier to deprescribing.  
58  
59 242 Many patients stated their fear of a return of the previous condition, health deterioration,  
60

1  
2  
3 243 becoming a burden, or a shorter lifespan following deprescribing<sup>(4, 28, 30, 31, 34, 43)</sup>. Some linked  
4  
5 244 this fear with the perceived severity of their disease<sup>(26, 31)</sup>. These concerns were shared by  
6  
7 245 informal caregivers.  
8  
9  
10 246 GPs and specialists feared harming patients by deprescribing (e.g., occurrence of CV event with  
11  
12 247 functional limitation, death)<sup>(23, 24, 29, 30, 35-37)</sup>, and giving patients the feeling that they were giving  
13  
14 248 up on them, especially by deprescribing towards the end of life, a feeling not shared by  
15  
16 249 patients<sup>(23, 29, 35, 38, 40)</sup>. Furthermore, patients fearing ADEs or becoming “dependent” on their  
17  
18 250 CVMs were more willing to deprescribe<sup>(26, 39)</sup>.  
19  
20  
21  
22 251

### 23 24 252 **3.3. Dislike**

25  
26 253 CVM dislike was an important facilitator to deprescribing for patients and informal caregivers,  
27  
28 254 but not for HCPs. Some patients stated a general dislike of medications or explained feeling  
29  
30 255 burdened by the number of medications (CVMs and others), or medication-associated costs<sup>(4,</sup>  
31  
32 256 <sup>26, 28, 30, 31, 33, 34, 42)</sup>. Others were aiming at living a long life without using medications, or derived  
33  
34 257 a personal pride of not taking medications<sup>(28, 43)</sup>. Some patients and informal caregivers  
35  
36 258 considered CVMs as “not good for health”<sup>(26)</sup> or despised CVMs that created therapeutic  
37  
38 259 competition (i.e., helping one condition while worsening another one) or which administration  
39  
40 260 was complicated or disrupted daily routine (e.g., glycaemia before insulin injections)<sup>(4, 31)</sup>.  
41  
42  
43  
44 261

### 45 46 47 262 **3.4. Influences**

48  
49 263 Patient and HCP opinions towards deprescribing were largely shaped by their previous  
50  
51 264 experiences in deprescribing CVMs, and social influences.  
52  
53  
54 265

#### 55 56 266 **3.4.1 Previous experiences**

57  
58 267 Patients and HCPs with a positive previous experience with CVM deprescribing were more  
59  
60 268 amenable to deprescribe again, as opposed to those with a negative previous experience <sup>(4, 23, 24,</sup>

269 26, 29, 30, 35). GPs considered patients feeling better or with improved quality of life after  
270 deprescribing as positive experiences<sup>(23, 35)</sup>, and having to restart medications after  
271 deprescribing as a negative experience<sup>(35)</sup>. For statins, occurrence or absence of stroke after  
272 deprescribing influenced GPs' and specialists' further actions<sup>(24, 29)</sup>.

273

### 274 3.4.2 Social influences

275 HCPs highly influenced patients' and informal caregivers' opinion on deprescribing <sup>(31, 39)</sup>.  
276 Patients were willing to stop one or more CVM if this was proposed by a trusting physician<sup>(26)</sup>.  
277 Patients especially trusted their GP because of their knowledge and the fact that they knew them  
278 well<sup>(28, 30, 34, 43)</sup>. Some patients also recognized their dependency towards their GP and  
279 highlighted their authority, feeling that it would be inappropriate to discuss their evaluation<sup>(34)</sup>.  
280 Many were waiting for their GP to start discussions about preferences, or were happy to follow  
281 their recommendations<sup>(28, 34)</sup>.  
282 GPs accounted for patient preferences <sup>(24, 27, 32, 35, 41)</sup>. They considered deprescribing in patients  
283 wanting to take less medications<sup>(27, 32)</sup>. They continued CVMs in patients expecting longevity  
284 or whose family was urging for medication continuation<sup>(27)</sup>. GPs were also unwilling to  
285 deprescribe CVMs prescribed by specialists, even if they questioned the indication<sup>(23, 24, 27, 30,</sup>  
286 <sup>36)</sup>. Specialists were concerned by interfering with other HCPs' treatment plan<sup>(29, 37)</sup>. They were  
287 also unwilling to deprescribe when communication with other HCPs was suboptimal or when  
288 patients were reluctant or could not understand the concept of deprescribing<sup>(33, 37)</sup>.

289

### 290 3.5. Process

291 HCPs and patients reported time constraint, such as lacking time to review medication lists or  
292 to discuss CVMs, as an important barrier to CVM deprescribing<sup>(26, 29, 35, 37, 38)</sup>.  
293 For patients, a dose-lowering scheme, a close monitoring after deprescribing and a temporary  
294 stopping trial with possibility of medication resumption facilitated the deprescribing process<sup>(4)</sup>.

1  
2  
3 295 26, 28, 30). GPs also viewed gradual CVM discontinuation as a facilitator to deprescribing,  
4  
5 296 especially when they were unsure about CVM risk/benefit ratio (24, 36). However, they  
6  
7 297 considered the lack of remuneration for the close follow-up needed during gradual  
8  
9 298 discontinuation as a barrier(24).

10  
11  
12 299

### 13 14 300 **3.6. Uncertainty**

15  
16  
17 301 HCPs formulated the lack of evidence about CVM deprescribing as a barrier, especially in older  
18  
19 302 patients or those with dementia(23, 29, 37). GPs found complicated to know when to deprescribe  
20  
21 303 preventive medications – especially in patients neither frail nor robust(23, 35) – and how to  
22  
23 304 balance CVM harms and benefits when approaching deprescribing(27). One clinical pharmacist  
24  
25 305 explained having difficulties making professional recommendations about statin deprescribing  
26  
27 306 in older patients(24). Specialists regretted the limited training on deprescribing(37).

28  
29 307 Patients expressed a lack of understanding of CVDs and risk reduction with CVMs, as well as  
30  
31 308 uncertainty regarding potential risks and benefits of CVMs, thus feeling uncertain about the  
32  
33 309 value of deprescribing(4, 26, 34). They were also confused by conflicting treatment targets  
34  
35 310 mentioned by HCPs(26).

36  
37  
38 311 Some HCPs and patients also felt uneasy about the uncertainty surrounding possible  
39  
40 312 consequences of CVM deprescribing(24, 38). This led to “therapeutic inertia”, even in case of  
41  
42 313 unclear benefits of pursuing CVMs(29). On the contrary, GPs and clinical pharmacists feeling  
43  
44 314 uneasy about possible long-term consequences of taking CVMs were more willing to  
45  
46 315 deprescribe(24).

47  
48  
49 316

### 50 51 52 317 **3.7. Ambivalence**

53  
54  
55 318 Patients expressed ambivalence about CVM use, prompting them to wish CVM continuation  
56  
57 319 and deprescribing concurrently. They were concerned about the effects of CVMs on their  
58  
59  
60

1  
2  
3 320 health, but also about what could happen if they did not take them<sup>(4)</sup>. They also showed aversion  
4  
5 321 towards CVMs coupled with a feeling of obligation to take them<sup>(4, 34)</sup>.  
6  
7  
8 322

#### 10 323 **4. Discussion**

11  
12 324 In this systematic review, we provided an overview of barriers and facilitators to deprescribing  
13  
14 325 CVMs, from the point of view of patients, informal caregivers and HCPs. Barriers and  
15  
16 326 facilitators could be classified in the following categories: appropriateness, fear, dislike,  
17  
18 327 influences, process, uncertainty, ambivalence. Appropriateness was divided into three themes  
19  
20 328 (necessity, benefit, ADEs), and influences into two themes (previous experiences, social  
21  
22 329 influences). Important deprescribing barriers for HCPs and patients included uncertainty due to  
23  
24 330 lack of evidence regarding CVM deprescribing, fear of negative consequences following  
25  
26 331 deprescribing, and time constraints. An important facilitator to deprescribing for patients and  
27  
28 332 HCPs was the occurrence of ADEs. Other facilitators for patients were dislike of CVMs or  
29  
30 333 establishment of a deprescribing plan. Necessity and benefit of CVMs were seen as barriers or  
31  
32 334 facilitators similarly by patients and HCPs. However, patients and HCPs disagreed on the  
33  
34 335 necessity and benefit of taking CVMs in case of frailty or robustness. Social influences and  
35  
36 336 patient ambivalence acted both as barriers and facilitators to deprescribing.  
37  
38  
39  
40  
41  
42  
43

44 338 Barriers and facilitators to deprescribing CVMs did not differ significantly from those of  
45  
46 339 deprescribing general medications<sup>(20, 45)</sup>. A systematic review on patients' barriers and  
47  
48 340 facilitators to deprescribing displayed the same structure as ours, reporting agreement with  
49  
50 341 appropriateness of cessation, fear, influences, dislike and process as barriers and/or facilitators  
51  
52 342 to deprescribing<sup>(20)</sup>. However, this review that included mainly nervous system medications,  
53  
54 343 did not report uncertainty and ambivalence towards deprescribing, suggesting that these two  
55  
56 344 factors were more specific to CVM deprescribing. Another systematic review on prescribers'  
57  
58 345 barriers and facilitators to deprescribing potentially inappropriate medications reported four  
59  
60

1  
2  
3 346 main categories: awareness, inertia, self-efficacy and feasibility<sup>(45)</sup>. Although studies included  
4  
5 347 in our review did not really reflect on HCPs' level of awareness of the appropriateness of their  
6  
7 348 CVM prescribing, we also found that some HCPs experienced deprescribing inertia, continuing  
8  
9 349 CVMs even if they might be inappropriate, partly because of fear of bad/unknown  
10  
11 350 consequences of deprescribing.  
12  
13  
14

15 351  
16  
17 352 We found that patient and HCP points of view towards CVM deprescribing were largely  
18  
19 353 similar. One main difference was the necessity/benefit of CVMs in robust versus frail patients.  
20  
21 354 As shown in a study evaluating frail patient beliefs about prescribed medications, most patients  
22  
23 355 saw their medications as highly necessary<sup>(46)</sup>. However, over one-third of patients included in  
24  
25 356 this study stated that their medications were a mystery to them<sup>(46)</sup>. This stresses the fact that  
26  
27 357 patients might see a medication as necessary without being able to understand its potential (lack  
28  
29 358 of) benefit. HCPs, on the other hand, seemed to place importance on their patients deriving  
30  
31 359 benefits from their CVMs. Thus, they endorsed deprescribing in frail patients due to a lack of  
32  
33 360 time to benefit, but renounced deprescribing in robust patients. This view is concordant with  
34  
35 361 other studies on treating frail and/or robust patients<sup>(9, 47)</sup>.  
36  
37  
38  
39

40 362  
41  
42 363 Lack of evidence on the risk/benefit profile of CVMs and potential consequences of  
43  
44 364 deprescribing in certain populations made patients and HCPs uncertain towards CVM  
45  
46 365 deprescribing. Such uncertainty was also reported in studies focusing on deprescribing general  
47  
48 366 medications in older, multimorbid adults, likely because of the complexity of interactions  
49  
50 367 between diseases and the single-disease focused guidelines that might not apply to patients with  
51  
52 368 multimorbidity<sup>(48-50)</sup>. However, one of these studies stated that balancing benefits and harms  
53  
54 369 was particularly complicated for preventive medications<sup>(48)</sup>. As shown in our review and in  
55  
56 370 previous studies, HCP and patient uncertainty might lead to fear of bad or unknown  
57  
58 371 consequences and prevent deprescribing<sup>(51, 52)</sup>. HCPs were also afraid of patients feeling that  
59  
60

1  
2  
3 372 they were giving up on them, especially towards the end of life, a point of view that was  
4  
5 373 nevertheless not shared by patients. These divergent views emphasize the need for discussion  
6  
7 374 between HCPs and patients about representations and beliefs, and how these might influence  
8  
9 375 decision-making in the context of uncertainty about deprescribing. This is especially important  
10  
11 376 for HCPs to consider, given that patients might assume that they do not have to discuss their  
12  
13 377 preferences and beliefs as these are already clear for their HCPs<sup>(53)</sup>.  
14  
15  
16

17 378  
18  
19 379 This systematic review highlights the uncertainty that can arise when approaching CVM  
20  
21 380 deprescribing, and the inertia that can result from it. In this context, discussions between HCPs  
22  
23 381 and patients and/or informal caregivers about representations, beliefs and preferences have the  
24  
25 382 potential to mitigate such uncertainty, and enable shared decision-making. Finding ways to  
26  
27 383 make deprescribing as safe as possible in the current context of uncertainty is also central. To  
28  
29 384 achieve this, some studies included in this review provided keys to enable patients to feel safe  
30  
31 385 about deprescribing: gradual deprescribing and close monitoring of medical parameters, as well  
32  
33 386 as deprescribing trials and possibility of medication resumption.  
34  
35  
36

37 387

## 38 388 **5. Strengths and limitations**

39  
40 389 This study has several strengths. First, data extraction, analysis and synthesis, as well as quality  
41  
42 390 assessment were conducted by two independent reviewers on all available data based on a  
43  
44 391 systematic review. Second, we included both quantitative and qualitative studies, providing  
45  
46 392 complementary information on barriers and facilitators to deprescribing.  
47  
48

49 393 However, this study also has limitations. First, in some studies, CVMs were part of the  
50  
51 394 evaluated medications but not the focus. However, this enabled inclusion of more studies and  
52  
53 395 thus exploration of more barriers and facilitators to deprescribing CVMs. Second, as this review  
54  
55 396 focused on CVMs in general, no conclusion can be made on individual CVMs. However,  
56  
57 397 barriers and facilitators did not appear to differ significantly between studies  
58  
59  
60

1  
2  
3 398 assessing/exploring different CVMs, which leads to thinking that most barriers and facilitators  
4  
5 399 might be common across CVMs.  
6  
7  
8 400

## 10 401 **6. Conclusion**

12 402 In this systematic review, we provided an overview of barriers and facilitators to deprescribing  
13  
14 403 CVMs, from the point of view of patients, informal caregivers and HCPs. We could see that  
15  
16  
17 404 patient, informal caregiver and HCP expressed barriers and facilitators to deprescribing did not  
18  
19 405 differ significantly. However, we could highlight certain differences in opinions between  
20  
21 406 patients and HCPs that stress the need for ground discussions about beliefs and preferences  
22  
23  
24 407 about deprescribing of each stakeholder implicated in the deprescribing decision. As  
25  
26 408 uncertainty prevails when it comes to deprescribing CVMs, strategies to enable the safest  
27  
28 409 deprescribing, such as gradual deprescribing or close monitoring following deprescribing, can  
29  
30 410 be established in everyday practice.  
31  
32

33 411

## 35 412 **7. Acknowledgments**

37 413 The authors want to thank Judith Ellen Smith, Librarian at the University of Michigan (Ann  
38  
39 414 Arbor, USA), who helped develop the search strategy, and Dr. Manuel Raphael Blum (Institute  
40  
41 415 of Primary Health Care (BIHAM), University of Bern, Switzerland; Department of General  
42  
43 416 Internal Medicine, Inselspital, Bern University Hospital, University of Bern, Switzerland), who  
44  
45 417 critically revised the study protocol.  
46  
47  
48

49 418

### 51 419 7.1. Financial and personal conflicts of interest:

53  
54 420 The authors declare no conflict of interest.  
55

56 421

### 58 422 7.2. Author contributions:



1  
2  
3 423 CEA, LB and NR designed the study protocol. CEA and LB extracted and analyzed the data.  
4

5 424 CEA, LB and NR drafted the article. All authors gave final approval to submit the article.  
6  
7

8 425  
9

10 426 7.3. Sponsors' role:  
11

12 427 All authors were partly supported by the Swiss National Science Foundation Grant IICT  
13

14 428 33IC30-193052, and LB was supported by a grant from the College of General Internal  
15

16 429 Medicine. Both funding sources had no role in this study.  
17  
18

19 430  
20

21 431 7.4. Data sharing statement:  
22

23 432 The coding of the articles is available by the authors on reasonable request.  
24  
25

26 433  
27

28 434 7.5. Funding:  
29

30 435 All authors were partly supported by the Swiss National Science Foundation Grant IICT  
31

32 436 33IC30-193052 (PI Prof. Rodondi). LB and this study were supported by a grant from the  
33

34 437 College of General Internal Medicine (Fribourg, Switzerland) (No grant number).  
35  
36

37 438  
38

39 439 7.6. Competing interests statement:  
40

41 440 Nothing to disclose.  
42  
43

44 441  
45

46 442  
47

48 443  
49

50 444  
51

52 445  
53

54 446  
55

56 447  
57

58 448  
59  
60

1  
2  
3 449  
4  
5 450  
6  
7  
8 451  
9  
10 452  
11  
12 453  
13  
14 454  
15  
16 455  
17  
18 456  
19  
20 457  
21  
22  
23  
24 458  
25  
26 459  
27  
28 460  
29  
30 461  
31  
32  
33 462  
34  
35 463  
36  
37 464  
38  
39  
40 465  
41  
42 466  
43  
44 467  
45  
46 468  
47  
48 469  
49  
50  
51 470  
52  
53 471  
54  
55 472  
56  
57 473  
58  
59  
60

## 8. References

1. Krishnaswami A, Steinman MA, Goyal P, Zullo AR, Anderson TS, Birtcher KK, et al. Deprescribing in Older Adults With Cardiovascular Disease. *J Am Coll Cardiol* 2019;73(20):2584-95.
2. Scott IA, Hilmer SN, Reeve E, Potter K, Le Couteur D, Rigby D, et al. Reducing inappropriate polypharmacy: the process of deprescribing. *JAMA Intern Med* 2015;175(5):827-34.
3. Informatics IIfH. Global Medicines Use in 2020. Available at: <https://www.iqvia.com/-/media/iqvia/pdfs/institute-reports/global-medicines-use-in-2020>. Accessed July 12, 2021.
4. Goyal P, Requiño T, Siceloff B, Shen MJ, Masterson Creber R, Hilmer SN, et al. Patient-Reported Barriers and Facilitators to Deprescribing Cardiovascular Medications. *Drugs Aging* 2020;37(2):125-35.
5. Budnitz DS, Lovegrove MC, Shehab N, Richards CL. Emergency hospitalizations for adverse drug events in older Americans. *N Engl J Med* 2011;365(21):2002-12.
6. Akbulut M, Urun Y. Onco-cardiology: Drug-drug interactions of antineoplastic and cardiovascular drugs. *Crit Rev Oncol Hematol* 2020;145:102822.

- 1  
2  
3 474 7. Rossello X, Pocock SJ, Julian DG. Long-Term Use of Cardiovascular Drugs:  
4  
5 475 Challenges for Research and for Patient Care. *J Am Coll Cardiol* 2015;66(11):1273-85.  
6
- 7  
8 476 8. Ridker PM, Danielson E, Fonseca FA, Genest J, Gotto AM, Jr., Kastelein JJ, et al.  
9  
10 477 Rosuvastatin to prevent vascular events in men and women with elevated C-reactive protein. *N*  
11  
12 478 *Engl J Med* 2008;359(21):2195-207.  
13
- 14  
15 479 9. Kutner JS, Blatchford PJ, Taylor DH, Jr., Ritchie CS, Bull JH, Fairclough DL, et al.  
16  
17 480 Safety and benefit of discontinuing statin therapy in the setting of advanced, life-limiting  
18  
19 481 illness: a randomized clinical trial. *JAMA Intern Med* 2015;175(5):691-700.  
20
- 21  
22 482 10. Chan EY, Hong MLI, Tan MYG, Chua WL. Older patients' participation in physical  
23  
24 483 activity during hospitalization: A qualitative study of ward nurses' perceptions in an Asian  
25  
26 484 context. *Geriatr Nurs* 2019;40(1):91-8.  
27
- 28  
29 485 11. Moonen JE, Foster-Dingley JC, de Ruijter W, van der Grond J, de Craen AJ, van der  
30  
31 486 Mast RC. Effect of discontinuation of antihypertensive medication on orthostatic hypotension  
32  
33 487 in older persons with mild cognitive impairment: the DANTE Study Leiden. *Age Ageing*  
34  
35 488 2016;45(2):249-55.  
36
- 37  
38 489 12. Williamson JD, Pajewski NM, Auchus AP, Bryan RN, Chelune G, Cheung AK, et al.  
39  
40 490 Effect of Intensive vs Standard Blood Pressure Control on Probable Dementia: A Randomized  
41  
42 491 Clinical Trial. *JAMA* 2019;321(6):553-61.  
43
- 44  
45 492 13. Linsky A, Meterko M, Bokhour BG, Stolzmann K, Simon SR. Deprescribing in the  
46  
47 493 context of multiple providers: understanding patient preferences. *Am J Manag Care*  
48  
49 494 2019;25(4):192-8.  
50
- 51  
52 495 14. Holmes HM, Todd A. The Role of Patient Preferences in Deprescribing. *Clin Geriatr*  
53  
54 496 *Med* 2017;33(2):165-75.  
55
- 56  
57 497 15. McCartney M, Treadwell J, Maskrey N, Lehman R. Making evidence based medicine  
58  
59 498 work for individual patients. *BMJ* 2016;353:i2452.  
60

- 1  
2  
3 499 16. Weir K, Nickel B, Naganathan V, Bonner C, McCaffery K, Carter SM, et al. Decision-  
4  
5 500 Making Preferences and Deprescribing: Perspectives of Older Adults and Companions About  
6  
7 501 Their Medicines. *J Gerontol B Psychol Sci Soc Sci* 2018;73(7):e98-e107.
- 8  
9 502 17. Woodward MC. Deprescribing: Achieving Better Health Outcomes for Older People  
10  
11 503 Through Reducing Medications. *J Pharm Pract Res* 2003;33(4):323-8.
- 12  
13 504 18. Vaismoradi M, Turunen H, Bondas T. Content analysis and thematic analysis:  
14  
15 505 Implications for conducting a qualitative descriptive study. *Nurs Health Sci* 2013;15(3):398-  
16  
17 506 405.
- 18  
19 507 19. Burnard P, Gill P, Stewart K, Treasure E, Chadwick B. Analysing and presenting  
20  
21 508 qualitative data. *Br Dent J* 2008;204(8):429-32.
- 22  
23 509 20. Reeve E, To J, Hendrix I, Shakib S, Roberts MS, Wiese MD. Patient barriers to and  
24  
25 510 enablers of deprescribing: a systematic review. *Drugs Aging* 2013;30(10):793-807.
- 26  
27 511 21. Hong QN, Gonzalez-Reyes A, Pluye P. Improving the usefulness of a tool for appraising  
28  
29 512 the quality of qualitative, quantitative and mixed methods studies, the Mixed Methods  
30  
31 513 Appraisal Tool (MMAT). *J Eval Clin Pract* 2018;24(3):459-67.
- 32  
33 514 22. Hong QN, Pluye P, Fàbregues S, Bartlett G, Boardman F, Cargo M, et al. Improving the  
34  
35 515 content validity of the mixed methods appraisal tool: a modified e-Delphi study. *J Clin*  
36  
37 516 *Epidemiol* 2019;111:49-59.e1.
- 38  
39 517 23. Ailabouni NJ, Nishtala PS, Mangin D, Tordoff JM. Challenges and Enablers of  
40  
41 518 Deprescribing: A General Practitioner Perspective. *PLoS One* 2016;11(4):e0151066.
- 42  
43 519 24. Anderson K, Foster M, Freeman C, Luetsch K, Scott I. Negotiating "Unmeasurable  
44  
45 520 Harm and Benefit": Perspectives of General Practitioners and Consultant Pharmacists on  
46  
47 521 Deprescribing in the Primary Care Setting. *Qual Health Res* 2017;27(13):1936-47.
- 48  
49 522 25. Benson J, Britten N. What effects do patients feel from their antihypertensive tablets  
50  
51 523 and how do they react to them? Qualitative analysis of interviews with patients. *Fam Pract*  
52  
53 524 2006;23(1):80-7.

- 1  
2  
3 525 26. Crutzen S, Baas G, Abou J, van den Born-Bondt T, Hugtenburg JG, Bouvy ML, et al.  
4  
5 526 Barriers and Enablers of Older Patients to Deprescribing of Cardiometabolic Medication: A  
6  
7 527 Focus Group Study. *Front Pharmacol* 2020;11:1268.
- 8  
9  
10 528 27. Jansen J, McKinn S, Bonner C, Irwig L, Doust J, Glasziou P, et al. General Practitioners'  
11  
12 529 Decision Making about Primary Prevention of Cardiovascular Disease in Older Adults: A  
13  
14 530 Qualitative Study. *PLoS One* 2017;12(1):e0170228.
- 15  
16  
17 531 28. Jansen J, McKinn S, Bonner C, Muscat DM, Doust J, McCaffery K. Shared decision-  
18  
19 532 making about cardiovascular disease medication in older people: a qualitative study of patient  
20  
21 533 experiences in general practice. *BMJ Open* 2019;9(3):e026342.
- 22  
23  
24 534 29. Green AR, Lee P, Reeve E, Wolff JL, Chen CCG, Kruzan R, et al. Clinicians'  
25  
26 535 Perspectives on Barriers and Enablers of Optimal Prescribing in Patients with Dementia and  
27  
28 536 Coexisting Conditions. *J Am Board Fam Med* 2019;32(3):383-91.
- 29  
30  
31 537 30. Luymes CH, van der Kleij RMJJ, Poortvliet RKE, de Ruijter W, Reis R, Numans ME.  
32  
33 538 Deprescribing Potentially Inappropriate Preventive Cardiovascular Medication: Barriers and  
34  
35 539 Enablers for Patients and General Practitioners. *Ann Pharmacother* 2016;50(6):446-54.
- 36  
37  
38 540 31. Pickering AN, Hamm ME, Dawdani A, Hanlon JT, Thorpe CT, Gellad WF, et al. Older  
39  
40 541 Patient and Caregiver Perspectives on Medication Value and Deprescribing: A Qualitative  
41  
42 542 Study. *J Am Geriatr Soc* 2020;68(4):746-53.
- 43  
44  
45 543 32. Thompson W, Le JV, Haastrup P, Nielsen JB, Pedersen LB, Jarbøl DE. Exploring how  
46  
47 544 GPs discuss statin deprescribing with older people: A qualitative study. *BJGP Open* 2020;4(1).
- 48  
49 545 33. Todd A, Holmes H, Pearson S, Hughes C, Andrew I, Baker L, et al. 'I don't think I'd be  
50  
51 546 frightened if the statins went': A phenomenological qualitative study exploring medicines use  
52  
53 547 in palliative care patients, carers and healthcare professionals. *BMC Palliat Care* 2016;15(1).
- 54  
55  
56 548 34. van Bussel E, Reurich L, Pols J, Richard E, Moll van Charante E, Ligthart S.  
57  
58 549 Hypertension management: experiences, wishes and concerns among older people-a qualitative  
59  
60 550 study. *BMJ Open* 2019;9(8):e030742.

- 1  
2  
3 551 35. van Middelaar T, Ivens SD, van Peet PG, Poortvliet RKE, Richard E, Pols AJ, et al.  
4  
5 552 Prescribing and deprescribing antihypertensive medication in older people by Dutch general  
6  
7 553 practitioners: a qualitative study. *BMJ Open* 2018;8(4):e020871.
- 8  
9  
10 554 36. Ailabouni NJ, Nishtala PS, Mangin D, Tordoff JM. General practitioners' insight into  
11  
12 555 deprescribing for the multimorbid older individual: a qualitative study. *Int J Clin Pract*  
13  
14 556 2016;70(3):261-76.
- 15  
16  
17 557 37. Goyal P, Anderson TS, Bernacki GM, Marcum ZA, Orkaby AR, Kim D, et al. Physician  
18  
19 558 Perspectives on Deprescribing Cardiovascular Medications for Older Adults. *J Am Geriatr Soc*  
20  
21 559 2020;68(1):78-86.
- 22  
23  
24 560 38. Geijteman ECT, Huisman BAA, Dees MK, Perez RSGM, Van Der Rijt CCD, Van  
25  
26 561 Zuylen L, et al. Medication Discontinuation at the End of Life: A Questionnaire Study on  
27  
28 562 Physicians' Experiences and Opinions. *J Palliat Med* 2018;21(8):1166-70.
- 29  
30  
31 563 39. Qi K, Reeve E, Hilmer SN, Pearson S-A, Matthews S, Gnjjidic D. Older peoples'  
32  
33 564 attitudes regarding polypharmacy, statin use and willingness to have statins deprescribed in  
34  
35 565 Australia. *Int J Clin Pharm* 2015;37(5):949-57.
- 36  
37  
38 566 40. Tjia J, Kutner JS, Ritchie CS, Blatchford PJ, Bennett Kendrick RE, Prince-Paul M, et  
39  
40 567 al. Perceptions of Statin Discontinuation among Patients with Life-Limiting Illness. *J Palliat*  
41  
42 568 *Med* 2017;20(10):1098-103.
- 43  
44  
45 569 41. van der Ploeg MA, Streit S, Achterberg WP, Beers E, Bohnen AM, Burman RA, et al.  
46  
47 570 Patient Characteristics and General Practitioners' Advice to Stop Statins in Oldest-Old Patients:  
48  
49 571 a Survey Study Across 30 Countries. *J Gen Intern Med* 2019;34(9):1751-7.
- 50  
51  
52 572 42. Brinton EA. Understanding Patient Adherence and Concerns with STatins and  
53  
54 573 MedicatION Discussions With Physicians (ACTION): A survey on the patient perspective of  
55  
56 574 dialogue with healthcare providers regarding statin therapy. *Clin cardiol* 2018;41(6):710-20.  
57  
58  
59  
60

- 1  
2  
3 575 43. Luymes CH, Boelhouwer NJ, Poortvliet RK, de Ruijter W, Reis R, Numans ME.  
4  
5 576 Understanding deprescribing of preventive cardiovascular medication: a Q-methodology study  
6  
7 577 in patients. *Patient Prefer Adherence* 2017;11:975-84.  
8  
9  
10 578 44. Jamison J, Sutton S, Mant J, Simoni AD. Barriers and facilitators to adherence to  
11  
12 579 secondary stroke prevention medications after stroke: Analysis of survivors and caregivers  
13  
14 580 views from an online stroke forum. *BMJ Open* 2017;7(7).  
15  
16  
17 581 45. Anderson K, Stowasser D, Freeman C, Scott I. Prescriber barriers and enablers to  
18  
19 582 minimising potentially inappropriate medications in adults: a systematic review and thematic  
20  
21 583 synthesis. *BMJ Open* 2014;4(12):e006544.  
22  
23  
24 584 46. Modig S, Kristensson J, Ekwall AK, Hallberg IR, Midlöv P. Frail elderly patients in  
25  
26 585 primary care--their medication knowledge and beliefs about prescribed medicines. *Eur J Clin*  
27  
28 586 *Pharmacol* 2009;65(2):151-5.  
29  
30  
31 587 47. Benetos A, Rossignol P, Cherubini A, Joly L, Grodzicki T, Rajkumar C, et al.  
32  
33 588 Polypharmacy in the Aging Patient: Management of Hypertension in Octogenarians. *JAMA*  
34  
35 589 2015;314(2):170-80.  
36  
37  
38 590 48. Bokhof B, Junius-Walker U. Reducing Polypharmacy from the Perspectives of General  
39  
40 591 Practitioners and Older Patients: A Synthesis of Qualitative Studies. *Drugs Aging*  
41  
42 592 2016;33(4):249-66.  
43  
44  
45 593 49. Rieckert A, Sommerauer C, Krumeich A, Sönnichsen A. Reduction of inappropriate  
46  
47 594 medication in older populations by electronic decision support (the PRIMA-eDS study): a  
48  
49 595 qualitative study of practical implementation in primary care. *BMC Fam Pract* 2018;19(1):110.  
50  
51  
52 596 50. Schuling J, Gebben H, Veehof LJ, Haaijer-Ruskamp FM. Deprescribing medication in  
53  
54 597 very elderly patients with multimorbidity: the view of Dutch GPs. A qualitative study. *BMC*  
55  
56 598 *Fam Pract* 2012;13:56.  
57  
58  
59  
60

1  
2  
3 599 51. van Peet PG, Drewes YM, Gussekloo J, de Ruijter W. GPs' perspectives on secondary  
4  
5 600 cardiovascular prevention in older age: a focus group study in the Netherlands. Br J Gen Pract  
6  
7 601 2015;65(640):e739-47.

8  
9  
10 602 52. Marshall IJ, Wolfe CD, McKeivitt C. Lay perspectives on hypertension and drug  
11  
12 603 adherence: systematic review of qualitative research. BMJ 2012;345:e3953.

13  
14 604 53. Bynum JP, Barre L, Reed C, Passow H. Participation of very old adults in health care  
15  
16 605 decisions. Med Decis Making 2014;34(2):216-30.

17  
18  
19 606

20  
21 607 **FIGURE LEGEND:**

22  
23 608 **Figure 1: Study selection results**

24  
25 609 **Abbreviations:** CVM: cardiovascular medication; HCP: healthcare providers  
26  
27  
28  
29  
30  
31  
32  
33  
34  
35  
36  
37  
38  
39  
40  
41  
42  
43  
44  
45  
46  
47  
48  
49  
50  
51  
52  
53  
54  
55  
56  
57  
58  
59  
60



1  
2  
3  
4  
5  
6  
7  
8  
9  
10  
11  
12  
13  
14  
15  
16  
17  
18  
19  
20  
21  
22  
23  
24  
25  
26  
27  
28  
29  
30  
31  
32  
33  
34  
35  
36  
37  
38  
39  
40  
41  
42  
43  
44  
45  
46  
47  
48  
49  
50  
51  
52  
53  
54  
55  
56  
57  
58  
59  
60

For peer review only

## 9. Supplemental material

The detailed search strategy, the detailed study characteristics, and the study quality appraisal are presented in the supplemental material section.

For peer review only

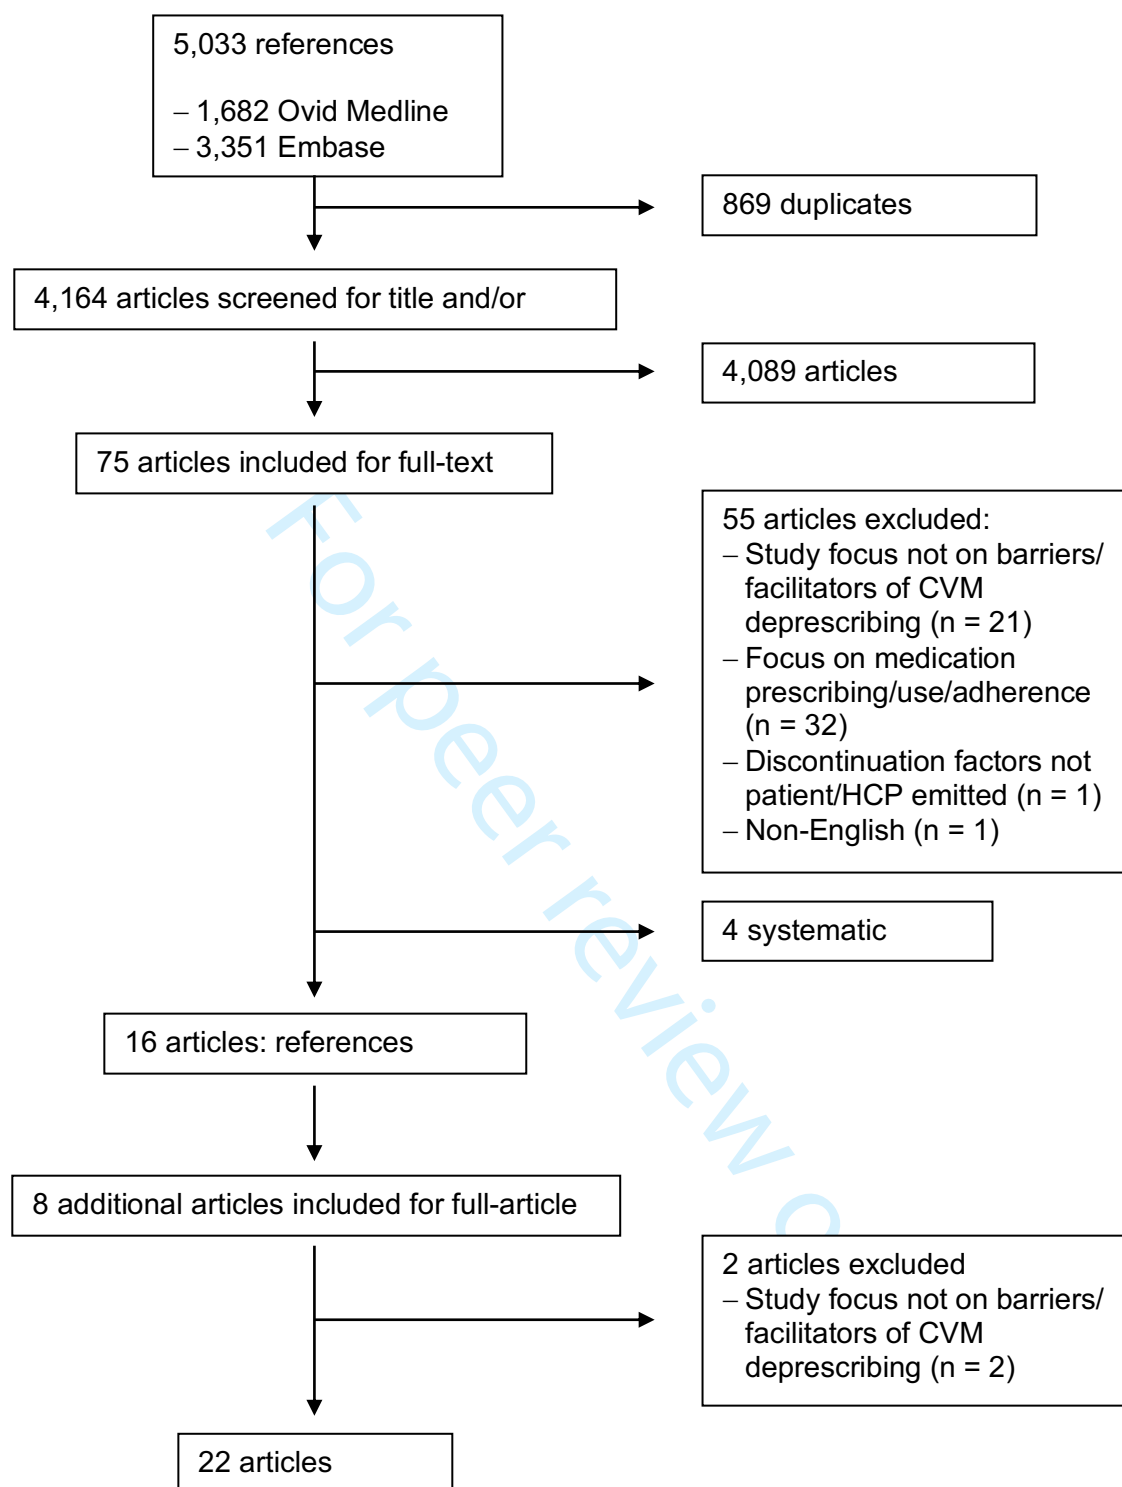

## Supplemental text S1: Search strategy of barriers and facilitators of deprescribing CVMs

### OID/MEDLINE 2021.11.15: 1,682 results

#### Concept 1: cardiovascular medications

1. exp cardiovascular agents/
2. exp Hydroxymethylglutaryl-CoA Reductase Inhibitors/
3. ("hmg coa reductase inhibitors" or "hmg-coa reductase inhibitors" or "hydroxymethylglutaryl coa reductase inhibitors" or "hydroxymethylglutaryl-coa inhibitors" or "hydroxymethylglutaryl-coa reductase inhibitors" or "hydroxymethylglutaryl-coenzyme a inhibitors" or "inhibitors, hmg coa reductase" or "inhibitors, hmg-coa reductase" or "inhibitors, hydroxymethylglutaryl coa" or "inhibitors, hydroxymethylglutaryl coenzyme a" or "inhibitors, hydroxymethylglutaryl-coa" or "inhibitors, hydroxymethylglutaryl-coa reductase" or "inhibitors, hydroxymethylglutaryl-coenzyme a" or "reductase inhibitors, hmg-coa" or "reductase inhibitors, hydroxymethylglutaryl-coa" or "hmg-coa statins" or statins or "statins, hmg coa" or "statins, hmg-coa" or "Cardiovascular medic\*" or "cardiovascular drug\*" or "cardiovascular preparation\*" or "cardiovascular medic\*" OR "cardiovascular prescri\*" or "cardiovascular therapeutic\*" or "cardiovascular treat\*" or "cardiomatabolic medic\*" or "cardiomatabolic drug\*" or "cardiomatabolic agent\*" or "cardiomatabolic preparation\*" or "cardiomatabolic prescrib\*" or "cardiomatabolic therapeutic\*" or "cardiomatabolic treat\*" or "lipid-lowering treat\*" or " lipid-lowering medic\*" or " lipid-lowering drug\*" or " lipid-lowering agent\*" or " lipid-lowering preparation\*" or " lipid-lowering prescrib\*" or "lipid-lowering therapeutic\*").ab,ti.
4. "cardiovascular disease".ab,ti.
5. \*cardiovascular diseases/
6. prevention.ab,ti.
7. \*primary prevention/
8. \*secondary prevention/
9. 4 or 5
10. 6 or 7 or 8
11. 9 and 10

#### Concept 2: prescribing / deprescribing

12. exp Deprescriptions/
13. exp Withholding Treatment/
14. exp Potentially Inappropriate Medication List/
15. exp Inappropriate Prescribing/
16. (reduce or reducing or reduction or reduced or withdraw\* or withhold\* or stop or stopped or stopping or elimin\* or tapering or taper or cease or ceasing or ceased or cessation\* or de-intensif\* or deintensif\* or deprescribing or deprescrib\* or "de-prescribing" or "de-prescrib\*" or "de-implementation\*" or "de-implement\*" or deimplement\* or discontinue\* or discontinuation\* or curb or curbing or curbed).ab,ti.

#### Concept 3: barriers and facilitators

17. \*patient acceptance of health care/
18. \*patient preference/
19. \*attitude to health/
20. \*physician-patient relations/
21. (barriers or barrier or issues or issue or problems or problem or hinder or hindered or hinders or facilitate or facilitates or facilitated or facilitator or facilitators or ease or easy or easier or difficult or difficulty or willingness or belief or believe\* or preference\* or willing or dialog\* or conversation\* or decision or decide\* or deciding or motivation or conversation or acceptance or acceptability).ti.

22. (perceptions or perception or behaviors or behavior or behaviour or behaviours or attitudes or attitude or input or inputs or experience or experiences or value or values or perspective\* or expectation\* or choice or choices or empower\* or choose\* or choosing or acceptance or acceptability or knowledge\* or preference\* or motivation\* or intention\* or involv\* or engag\* or consult\* or interact\* or involv\* or satisfaction or satisfied or discuss\* or discussion\*).ti.

23. (GP\* or pharmacist\* or physician\* or provider\* or patient\* or "general practitioner\*" or patient\* or adult\* or relative\* or caregiver\*).ti.

24. 22 and 23

25. 1 or 2 or 3 or 11

26. 12 or 13 or 14 or 15 or 16

27. 17 or 18 or 19 or 20 or 21 or 24

28. 25 and 26 and 27

29. limit 28 to (English language and yr="2003-Current")

30. (child or kid or kids or childhood or children or pediatric or paediatric or pediatrics or paediatrics or mouse or mice or animals or animal).ab,ti.

31. 29 not 30

### EMBASE 2021.11.15: 3,351 results

Concept 1: cardiovascular medications

1. 'cardiovascular agent'/exp

2. 'hydroxymethylglutaryl coenzyme A reductase inhibitor'/exp

3. ("hmg coa reductase inhibitors" or "hmg-coa reductase inhibitors" or "hydroxymethylglutaryl coa reductase inhibitors" or "hydroxymethylglutaryl-coa inhibitors" or "hydroxymethylglutaryl-coa reductase inhibitors" or "hydroxymethylglutaryl-coenzyme a inhibitors" or "inhibitors, hmg coa reductase" or "inhibitors, hmg-coa reductase" or "inhibitors, hydroxymethylglutaryl coa" or "inhibitors, hydroxymethylglutaryl coenzyme a" or "inhibitors, hydroxymethylglutaryl-coa" or "inhibitors, hydroxymethylglutaryl-coa reductase" or "inhibitors, hydroxymethylglutaryl-coenzyme a" or "reductase inhibitors, hmg-coa" or "reductase inhibitors, hydroxymethylglutaryl-coa" or "hmg-coa statins" or statins or "statins, hmg coa" or "statins, hmg-coa" or "Cardiovascular medic\*" or "cardiovascular drug\*" or "cardiovascular preparation\*" or "cardiovascular medic\*" OR "cardiovascular prescri\*" or "cardiovascular therapeutic\*" or "cardiovascular treat\*" or "cardiomatabolic medic\*" or "cardiomatabolic drug\*" or "cardiomatabolic agent\*" or "cardiomatabolic preparation\*" or "cardiomatabolic prescri\*" or "cardiomatabolic therapeutic\*" or "cardiomatabolic treat\*" or "lipid-lowering treat\*" or "lipid-lowering medic\*" or "lipid-lowering drug\*" or "lipid-lowering agent\*" or "lipid-lowering preparation\*" or "lipid-lowering prescri\*" or "lipid-lowering therapeutic\*"):ab,ti

4. "cardiovascular disease":ab,ti

5. 'cardiovascular diseases'/mj

6. prevention:ab,ti

7. 'primary prevention'/mj

8. 'secondary prevention'/mj

9. 4 or 5

10. 6 or 7 or 8

11. 9 and 10

Concept 2: prescribing / deprescribing

12. 'deprescription'/mj

13. 'treatment withdrawal'/mj

14. 'potentially inappropriate medication'/mj

15. 'inappropriate prescribing'/mj

1  
2  
3 16. (reduce or reducing or reduction or reduced or withdraw\* or withhold\* or stop or stopped or  
4 stopping or elimin\* or tapering or taper or cease or ceasing or ceased or cessation\* or de-intensif\* or  
5 deintensif\* or deprescribing or deprescrib\* or "de-prescribing" or "de-prescrib\*" or "de-  
6 implementation\*" or "de-implement\*" or deimplement\* or discontinue\* or discontinuation\* or curb  
7 or curbing or curbed):ab,ti  
8  
9

10 Concept 3: barriers and facilitators

11 17. 'patient attitude'/mj

12 18. 'patient preference'/mj

13 19. 'attitude to health'/mj

14 20. 'doctor patient relationship'/mj

15 21. (barriers or barrier or issues or issue or problems or problem or hinder or hindered or hinders or  
16 facilitate or facilitates or facilitated or facilitator or facilitators or ease or easy or easier or difficult or  
17 difficulty or willingness or belief or believe\* or preference\* or willing or dialog\* or conversation\* or  
18 decision or decide\* or deciding or motivation or conversation or acceptance or acceptability):ti

19 22. (perceptions or perception or behaviors or behavior or behaviour or behaviours or attitudes or  
20 attitude or input or inputs or experience or experiences or value or values or perspective\* or  
21 expectation\* or choice or choices or empower\* or choose\* or choosing or acceptance or acceptability  
22 or knowledge\* or preference\* or motivation\* or intention\* or involv\* or engag\* or consult\* or  
23 interact\* or involv\* or satisfaction or satisfied or discuss\* or discussion\*):ti

24 23. (GP\* or pharmacist\* or physician\* or provider\* or patient\* or "general practitioner\*" or patient\*  
25 or adult\* or relative\* or caregiver\*):ti

26 24. #22 AND #23

27 25. #1 OR #2 OR #3 OR #11

28 26. #12 OR #13 OR #14 OR #15 OR #16

29 27. #17 OR #18 OR #19 OR #20 OR #21 OR #24

30 28. #25 AND #26 AND #27

31 29. (child or kid or kids or childhood or children or pediatric or paediatric or pediatrics or paediatrics  
32 or mouse or mice or animals or animal):ti,ab

33 30. #25 AND #26 AND #27 NOT #29 AND ([article]/lim OR [review]/lim) AND [english]/lim AND  
34 ([embase]/lim OR [embase classic]/lim OR [pubmed-not-medline]/lim) AND [2003-2020]/py  
35  
36  
37  
38  
39  
40  
41  
42  
43  
44  
45  
46  
47  
48  
49  
50  
51  
52  
53  
54  
55  
56  
57  
58  
59  
60

Supplemental table S1: Study characteristics

|                                  | First author, publication year              | Setting         | Design                   | Data collection mean         | N population                        | Age                                                                                     | No of medication taken                                                                                               | Studied CVM(s)                            | Prevention type     | Life-limiting disease |
|----------------------------------|---------------------------------------------|-----------------|--------------------------|------------------------------|-------------------------------------|-----------------------------------------------------------------------------------------|----------------------------------------------------------------------------------------------------------------------|-------------------------------------------|---------------------|-----------------------|
| PATIENTS AND INFORMAL CAREGIVERS | Benson, 2005 (UK) <sup>(25)</sup>           | Primary care    | Qualitative              | Interviews                   | 38 patients                         | 18% <50 years<br>16% 50-59 years<br>29% 60-69 years<br>24% 70-79 years<br>13% ≥80 years | Antihypertensives:<br>50%: 1; 39%: 2; 11%: ≥3<br>Non-antihypertensives:<br>34%: 0; 18%: 2, 13%: 3;<br>11%: 4; 8%: ≥5 | Antihypertensives                         | Unknown             | No                    |
|                                  | Brinton, 2018 (USA) <sup>(42)</sup>         | Online panels   | Quantitative descriptive | Survey                       | 5014 patients                       | Mean age: 64                                                                            | 99% of current statin users taking a mean of 7.7 meds                                                                | Statin                                    | Primary & secondary | No                    |
|                                  | Crutzen, 2020 (Netherlands) <sup>(26)</sup> | Primary care    | Qualitative              | FGs                          | 17 patients<br>1 informal caregiver | Median age:<br>FG1: 78<br>FG2: 77.5                                                     | FG1: 6: 5-10; 2: >10<br>FG2: 4: 5-10; 5: >10                                                                         | Cardiometabolic medication                | Primary & secondary | No                    |
|                                  | Goyal, 2020 (USA) <sup>(4)</sup>            | Quaternary care | Qualitative              | Interviews                   | 10 patients                         | Median age: 80                                                                          | Median of 12                                                                                                         | β-blockers                                | Primary & secondary | No                    |
|                                  | Jansen, 2019 (Australia) <sup>(28)</sup>    | Primary care    | Qualitative              | Interviews                   | 30 patients                         | 20: 75-79 years<br>4: 80-84 years<br>5: 85-89 years<br>1: ≥90 years                     | Unknown                                                                                                              | Preventive cardiovascular medication      | Primary & secondary | No                    |
|                                  | Luymes, 2017 (Netherlands) <sup>(43)</sup>  | Primary care    | Mixed methods            | Q-sorts<br>Group discussions | 33 patients                         | Mean age:<br>- Q-Sort: 57.1<br>- Discussion: 57.7                                       | Unknown                                                                                                              | Lipid-lowering drugs<br>Antihypertensives | Primary             | No                    |

1  
2  
3  
4  
5  
6  
7  
8  
9  
10  
11  
12  
13  
14  
15  
16  
17  
18  
19  
20  
21  
22  
23  
24  
25  
26  
27  
28  
29  
30  
31  
32  
33  
34  
35  
36  
37  
38  
39  
40  
41  
42  
43  
44  
45  
46

|                                                |                                                                                          |                          |            |                                       |                                   |                                                |                                                                                    |                     |     |
|------------------------------------------------|------------------------------------------------------------------------------------------|--------------------------|------------|---------------------------------------|-----------------------------------|------------------------------------------------|------------------------------------------------------------------------------------|---------------------|-----|
| Pickering, 2020 (USA) <sup>(31)</sup>          | Claude D. Pepper Older Americans Independence Center Research Registry; Pitt+Me registry | Qualitative              | FGs        | 16 patients<br>17 informal caregivers | Patients ≥ 65<br>Caregivers 22-69 | ≥ 5 prescribed                                 | Unspecified (identified: antihypertensives, statins, antiplatelets, antidiabetics) | Primary & secondary | No  |
| Qi, 2015 (Australia) <sup>(39)</sup>           | Tertiary care                                                                            | Quantitative descriptive | Survey     | 180 patients                          | Median age: 78                    | Median of 8                                    | Regular medications<br>Statins                                                     | Primary & secondary | No  |
| Tija, 2017 (USA) <sup>(40)</sup>               | PCRC member sites                                                                        | Quantitative descriptive | Survey     | 297 patients                          | Mean age: 71.8                    | Mean of 11.5                                   | Statin                                                                             | Primary & secondary | Yes |
| Van Bussel, 2019 (Netherlands) <sup>(34)</sup> | Primary care                                                                             | Qualitative              | Interviews | 15 patients                           | Mean age: 81                      | Median of 4 with median of 2 antihypertensives | Antihypertensives                                                                  | Primary             | No  |

| HCPs | First author                                  | Setting      | Design      | Data collection mean | N population     | Years of experiences                 | Characteristics of patients cared by study HCPs |                        |                                                                           |                 |                       |
|------|-----------------------------------------------|--------------|-------------|----------------------|------------------|--------------------------------------|-------------------------------------------------|------------------------|---------------------------------------------------------------------------|-----------------|-----------------------|
|      |                                               |              |             |                      |                  |                                      | Age                                             | No of medication taken | Studied CVM(s)                                                            | Prevention type | Life-limiting disease |
|      | Ailabouni, 2016 (New Zealand) <sup>(36)</sup> | Primary care | Qualitative | Interviews           | 10 GPs           | Unknown                              | 83                                              | 17                     | Antiplatelets, statin, antidiabetics, diuretics, β-blocker, ACE inhibitor | Secondary       | No                    |
|      | Ailabouni, 2016 (New Zealand) <sup>(23)</sup> | Primary care | Qualitative | Interviews           | 10 GPs           | 2-32                                 | Unspecified (older patients)                    | Unknown                | Unspecified (statin and aspirin mentioned)                                | Unknown         | No                    |
|      | Anderson, 2017 (Australia) <sup>(24)</sup>    | Primary care | Qualitative | FGs                  | 32 GPs<br>15 CPs | GPs: median of 18<br>CP: median of 9 | Unknown                                         | Unknown                | Unspecified (statin mentioned)                                            | Unknown         | No                    |



|                                                    |                             |                          |            |                                                                                                                          |                                                                          |                              |                       |                                                                     |                       |            |
|----------------------------------------------------|-----------------------------|--------------------------|------------|--------------------------------------------------------------------------------------------------------------------------|--------------------------------------------------------------------------|------------------------------|-----------------------|---------------------------------------------------------------------|-----------------------|------------|
| Geijteman, 2018 (Netherlands) <sup>(38)</sup>      | Primary & secondary care    | Quantitative descriptive | Survey     | 174 GPs<br>147 clinical specialists (medical oncologists, geriatricians, cardiologists, pulmonologists, neurologists)    | 203: 0-9 years<br>56: 10-19 years<br>40: 20-29 years<br>18: ≥ 30 years   | 88                           | 10                    | ACE inhibitor, statin, anticoagulant, diuretic, antidiabetic        | Secondary             | Yes        |
| Goyal, 2020 (USA) <sup>(37)</sup>                  | Secondary and tertiary care | Quantitative descriptive | Survey     | 184 geriatricians<br>182 general internists<br>87 cardiologists                                                          | 86: 1-10 years<br>99: 11-20 years<br>138: 21-30 years<br>130: > 30 years | 79                           | Unspecified (several) | 4 cardiovascular medications                                        | Unknown               | Yes and no |
| Green, 2019 (USA) <sup>(29)</sup>                  | Primary & secondary care    | Qualitative              | Interviews | 19 physicians<br>2 nurse practitioners (family, internal & geriatric medicine, urogynecology, endocrinology, cardiology) | Mean of 14                                                               | Unspecified (older patients) | Unknown               | Unspecified (oral anticoagulants, antidiabetics, statins mentioned) | Unknown               | Yes        |
| Jansen, 2017 (Australia) <sup>(27)</sup>           | Primary care                | Qualitative              | Interviews | 25 GPs                                                                                                                   | 2: < 10 years<br>4: 10-19 years<br>7: 20-29 years<br>12: ≥ 30 years      | ≥75                          | Unknown               | Preventive cardiovascular medication                                | Primary               | No         |
| Thompson, 2020 (Denmark) <sup>(32)</sup>           | Primary care                | Qualitative              | Interviews | 11 GPs                                                                                                                   | Mean of 9                                                                | ≥ 80                         | Unknown               | Statin                                                              | Unknown               | Yes and no |
| Van Middelaar, 2020 (Netherlands) <sup>(35)</sup>  | Primary care                | Qualitative              | Interviews | 15 GPs                                                                                                                   | 4: 0-5 years<br>3: 5-10 years<br>3: 10-15 years<br>5: > 15 years         | Unspecified (older patients) | Unknown               | Antihypertensives                                                   | Unknown               | Yes and no |
| Van der Ploeg, 2018 (30 countries) <sup>(41)</sup> | Primary care                | Quantitative descriptive | Survey     | 2250 GPs                                                                                                                 | 358: < 5 years<br>1024: 5-20 years<br>865: > 20 years                    | ≥ 80                         | Unknown               | Statin                                                              | Primary and secondary | Yes and no |

1  
2  
3  
4  
5  
6  
7  
8  
9  
10  
11  
12  
13  
14  
15  
16  
17  
18  
19  
20

| PATIENTS, INFORMAL CAREGIVERS AND HCPS | First author                               | Setting                                             | Design      | Data collection mean                   | N population                                                                                        | Years of experiences | Patients' characteristics                              |                                |                                                                            |                 |                       |
|----------------------------------------|--------------------------------------------|-----------------------------------------------------|-------------|----------------------------------------|-----------------------------------------------------------------------------------------------------|----------------------|--------------------------------------------------------|--------------------------------|----------------------------------------------------------------------------|-----------------|-----------------------|
|                                        |                                            |                                                     |             |                                        |                                                                                                     |                      | Age                                                    | No of medication taken         | Studied CVM(s)                                                             | Prevention type | Life-limiting disease |
|                                        | Luymes, 2016 (Netherlands) <sup>(30)</sup> | Primary care                                        | Qualitative | Audiotaped deprescribing consultations | 10 GPs<br>49 patients                                                                               | Unknown              | Median of 55.4                                         | 27: < 2 kinds<br>22: ≥ 2 kinds | Antihypertensives, lipid-lowering drugs                                    | Primary         | No                    |
|                                        | Todd, 2016 (UK) <sup>(33)</sup>            | Specialist palliative care unit at a daycare centre | Qualitative | Interviews                             | 12 patients<br>12 informal caregivers<br>3 palliative consultants<br>3 nurse practitioners<br>6 GPs | Unknown              | 1: < 50<br>3: 51-60<br>3: 61-70<br>3: 71-79<br>2: ≥ 80 | Unknown                        | Unspecified (preventive medications, including statins, antihypertensives) | Unknown         | Yes                   |

21 **Abbreviations:** ACE inhibitor, angiotensin-converting enzyme inhibitor; CP, clinical pharmacist; CVM, cardiovascular medication; FG, focus group; GP, general practitioner;  
22 PCRC: Palliative Care Research Cooperation Group.

23  
24  
25  
26  
27  
28  
29  
30  
31  
32  
33  
34  
35  
36  
37  
38  
39  
40  
41  
42  
43  
44  
45  
46

Supplemental table S2: Study quality appraisal

|                          | First author, publication year | Is the qualitative approach appropriate to answer the research question? | Are the qualitative data collection methods adequate to address the research question? | Are the findings adequately derived from the data? | Is the interpretation of results sufficiently substantiated by data? | Is there coherence between qualitative data sources, collection, analysis and interpretation? |
|--------------------------|--------------------------------|--------------------------------------------------------------------------|----------------------------------------------------------------------------------------|----------------------------------------------------|----------------------------------------------------------------------|-----------------------------------------------------------------------------------------------|
| QUALITATIVE              | Ailabouni, 2016                | Can't tell                                                               | Yes                                                                                    | Yes                                                | Can't tell                                                           | Yes                                                                                           |
|                          | Ailabouni, 2016                | Yes                                                                      | Yes                                                                                    | Yes                                                | Yes                                                                  | Yes                                                                                           |
|                          | Anderson, 2017                 | Yes                                                                      | Yes                                                                                    | Yes                                                | Yes                                                                  | Yes                                                                                           |
|                          | Benson, 2005                   | Yes                                                                      | Yes                                                                                    | Yes                                                | Yes                                                                  | Yes                                                                                           |
|                          | Crutzen, 2020                  | Yes                                                                      | Yes                                                                                    | Yes                                                | Yes                                                                  | Yes                                                                                           |
|                          | Goyal, 2020                    | Yes                                                                      | Yes                                                                                    | Yes                                                | Yes                                                                  | Yes                                                                                           |
|                          | Green, 2019                    | Yes                                                                      | Yes                                                                                    | Yes                                                | Yes                                                                  | Yes                                                                                           |
|                          | Jansen, 2017                   | Yes                                                                      | Yes                                                                                    | Yes                                                | Yes                                                                  | Yes                                                                                           |
|                          | Jansen, 2019                   | Yes                                                                      | Yes                                                                                    | Yes                                                | Yes                                                                  | Yes                                                                                           |
|                          | Luymes, 2016                   | Yes                                                                      | Yes                                                                                    | Yes                                                | Yes                                                                  | Yes                                                                                           |
|                          | Pickering, 2020                | Yes                                                                      | Yes                                                                                    | Yes                                                | Yes                                                                  | Yes                                                                                           |
|                          | Thompson 2019                  | Yes                                                                      | Yes                                                                                    | Yes                                                | Yes                                                                  | Yes                                                                                           |
|                          | Todd, 2016                     | Yes                                                                      | Yes                                                                                    | Yes                                                | Yes                                                                  | Yes                                                                                           |
|                          | Van Bussel, 2019               | Yes                                                                      | Yes                                                                                    | Yes                                                | Yes                                                                  | Yes                                                                                           |
| Van Middelaar, 2018      | Yes                            | Yes                                                                      | Yes                                                                                    | Yes                                                | Yes                                                                  |                                                                                               |
| QUANTITATIVE DESCRIPTIVE |                                | Is the sampling strategy relevant to address the research question?      | Is the sample representative of the target population?                                 | Are the measurements appropriate?                  | Is the risk of nonresponse bias low?                                 | Is the statistical analysis appropriate to answer the research question?                      |
|                          | Brinton, 2018                  | Yes                                                                      | Yes                                                                                    | Can't tell                                         | No                                                                   | Can't tell                                                                                    |
|                          | Geijteman, 2018                | Yes                                                                      | No                                                                                     | Yes                                                | No                                                                   | Yes                                                                                           |
|                          | Goyal, 2020                    | Yes                                                                      | No                                                                                     | Yes                                                | No                                                                   | Yes                                                                                           |
|                          | Qi, 2015                       | Yes                                                                      | No                                                                                     | Yes                                                | Yes                                                                  | Yes                                                                                           |
|                          | Tija, 2017                     | Yes                                                                      | No                                                                                     | Yes                                                | Yes                                                                  | Yes                                                                                           |

|                      | Van der Ploeg, 2019 | Yes                                                                                                      | No                                                                                                       | Yes                                                                                                          | No                                                                                                            | Yes                                                                                                                       |
|----------------------|---------------------|----------------------------------------------------------------------------------------------------------|----------------------------------------------------------------------------------------------------------|--------------------------------------------------------------------------------------------------------------|---------------------------------------------------------------------------------------------------------------|---------------------------------------------------------------------------------------------------------------------------|
| <b>MIXED METHODS</b> |                     | <b>Is there an adequate rationale for using a mixed methods design to address the research question?</b> | <b>Are the different components of the study effectively integrated to answer the research question?</b> | <b>Are the outputs of the integration of qualitative and quantitative components adequately interpreted?</b> | <b>Are divergences and inconsistencies between quantitative and qualitative results adequately addressed?</b> | <b>Do the different components of the study adhere to the quality criteria of each tradition of the methods involved?</b> |
|                      | Luymes, 2017        | Yes                                                                                                      | Yes                                                                                                      | Yes                                                                                                          | No                                                                                                            | Yes                                                                                                                       |

For peer review only

1  
2  
3  
4  
5  
6  
7  
8  
9  
10  
11  
12  
13  
14  
15  
16  
17  
18  
19  
20  
21  
22  
23  
24  
25  
26  
27  
28  
29  
30  
31  
32  
33  
34  
35  
36  
37  
38  
39  
40  
41  
42  
43  
44  
45  
46

Supplemental Table S3: Summary of categories, themes and codes of barriers and facilitators to deprescribing CVMs

| Categories      | Themes    | Barriers or facilitators | Patients and/or informal caregivers                                                                                                    | HCPs                                                                                          | Patients and/or informal caregivers and HCPs                                                                                         |
|-----------------|-----------|--------------------------|----------------------------------------------------------------------------------------------------------------------------------------|-----------------------------------------------------------------------------------------------|--------------------------------------------------------------------------------------------------------------------------------------|
| APPROPRIATENESS | Necessity | Facilitators             | Low CV risk<br>Disease under control<br>Trigger disappearance                                                                          | Primary prevention<br>Age as single CVRF                                                      |                                                                                                                                      |
|                 |           | Barriers                 | CVM linked to survival                                                                                                                 | Unhealthy lifestyle<br>Many CVRFs                                                             | Past CV event<br>Family history of CVD<br>CVM should be taken until end of life                                                      |
|                 | Benefit   | Facilitators             | Robustness                                                                                                                             | Short life expectancy<br>Cognitive impairment<br>Nursing home patients<br>Palliative patients | No objective improvement under CVM<br>No subjective improvement under CVM                                                            |
|                 |           | Barriers                 | Frailty<br>CVM use = active contribution to health<br>CVM use = having control over one's self                                         | Good physical & cognitive function<br>Few comorbidities                                       | Objective improvement under CVM<br>Subjective improvement under CVM                                                                  |
|                 | ADEs      | Facilitators             | ADEs foster deprescribing discussion with HCP                                                                                          |                                                                                               | Reduction in QOL through ADEs                                                                                                        |
|                 |           | Barriers                 | ADEs balanced against reasons to take CVMs                                                                                             | ADEs in patients with CVD                                                                     | No ADE, no symptom from disease                                                                                                      |
|                 | FEAR      | Facilitators             | Fear of ADEs<br>Fear of becoming dependent on CVMs                                                                                     |                                                                                               |                                                                                                                                      |
|                 |           | Barriers                 | Fear of deprescribing due to severity of underlying disease<br>Fear of experiencing a CV event after deprescribing & becoming a burden | Feeling of giving up on patients                                                              | Fear of CV event, return of previous condition, health deterioration following deprescribing<br>Fear of shorter lifespan without CVM |

|             |                      |              |                                                                                                                                                                                                                |                                                                                                                                                                                 |                                                                              |
|-------------|----------------------|--------------|----------------------------------------------------------------------------------------------------------------------------------------------------------------------------------------------------------------|---------------------------------------------------------------------------------------------------------------------------------------------------------------------------------|------------------------------------------------------------------------------|
| DISLIKE     |                      | Facilitators | General dislike of medications<br>Medication-associated costs<br>Living a long life without using CVMs<br>Pride in not taking medications<br>CVMs = poison<br>CVMs = bad for health<br>Therapeutic competition |                                                                                                                                                                                 |                                                                              |
| INFLUENCES  | Previous experiences | Facilitators |                                                                                                                                                                                                                |                                                                                                                                                                                 | Positive previous experience with deprescribing (QOL improvement, no stroke) |
|             |                      | Barriers     |                                                                                                                                                                                                                |                                                                                                                                                                                 | Negative previous experience with deprescribing (restart medication, stroke) |
|             | Social influences    | Facilitators | HCPs (especially GP) advising deprescribing                                                                                                                                                                    | Patient's preferences                                                                                                                                                           |                                                                              |
|             |                      | Barriers     | HCPs (especially GP) advising against deprescribing                                                                                                                                                            | Patient's preferences (reluctance)<br>Patient's lack of understanding<br>Patient's family wants CVMs<br>Specialist prescription<br>Interference with other HCPs' treatment plan |                                                                              |
| PROCESS     |                      | Facilitators | Temporary deprescribing trial<br>Possibility of CVM resumption                                                                                                                                                 |                                                                                                                                                                                 | Dose-lowering scheme<br>Close monitoring                                     |
|             |                      | Barriers     |                                                                                                                                                                                                                | Lack of remuneration for close monitoring                                                                                                                                       | Time constraints                                                             |
| UNCERTAINTY |                      | Facilitators |                                                                                                                                                                                                                |                                                                                                                                                                                 | Uncertainty about possible consequences of taking CVMs                       |
|             |                      | Barriers     | Lack of understanding of CVDs and risk reduction with CVMs<br>Uncertainty about risks and benefits<br>Conflicting treatment targets                                                                            | Lack of evidence on deprescribing<br>Uncertainty about when to deprescribe<br>Uncertainty about risk-benefit balance<br>Limited training on deprescribing                       | Unknown consequences of deprescribing                                        |

1  
2  
3  
4  
5  
6  
7  
8  
9  
10  
11  
12  
13  
14  
15  
16  
17  
18  
19  
20  
21  
22  
23  
24  
25  
26  
27  
28  
29  
30  
31  
32  
33  
34  
35  
36  
37  
38  
39  
40  
41  
42  
43  
44  
45  
46

|             |  |                              |                                                                                                                           |  |  |
|-------------|--|------------------------------|---------------------------------------------------------------------------------------------------------------------------|--|--|
| AMBIVALENCE |  | Facilitators and/or barriers | Concern about CVM effect on health vs consequences of not taking CVMs<br>Aversion towards CVMs vs obligation to take CVMs |  |  |
|-------------|--|------------------------------|---------------------------------------------------------------------------------------------------------------------------|--|--|

**Abbreviations:** ADE, adverse drug event; CV, cardiovascular; CVD, cardiovascular disease; CVM, cardiovascular medication; CVRF, cardiovascular risk factor; GP, general practitioner; HCP, healthcare provider; QOL, quality of life.

For peer review only

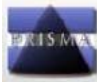

## PRISMA 2020 Checklist

| Section and Topic             | Item # | Checklist item                                                                                                                                                                                                                                                                                       | Location where item is reported |
|-------------------------------|--------|------------------------------------------------------------------------------------------------------------------------------------------------------------------------------------------------------------------------------------------------------------------------------------------------------|---------------------------------|
| <b>TITLE</b>                  |        |                                                                                                                                                                                                                                                                                                      |                                 |
| Title                         | 1      | Identify the report as a systematic review.                                                                                                                                                                                                                                                          | p.1                             |
| <b>ABSTRACT</b>               |        |                                                                                                                                                                                                                                                                                                      |                                 |
| Abstract                      | 2      | See the PRISMA 2020 for Abstracts checklist.                                                                                                                                                                                                                                                         | p.3-4                           |
| <b>INTRODUCTION</b>           |        |                                                                                                                                                                                                                                                                                                      |                                 |
| Rationale                     | 3      | Describe the rationale for the review in the context of existing knowledge.                                                                                                                                                                                                                          | p.5                             |
| Objectives                    | 4      | Provide an explicit statement of the objective(s) or question(s) the review addresses.                                                                                                                                                                                                               | p.5                             |
| <b>METHODS</b>                |        |                                                                                                                                                                                                                                                                                                      |                                 |
| Eligibility criteria          | 5      | Specify the inclusion and exclusion criteria for the review and how studies were grouped for the syntheses.                                                                                                                                                                                          | p.6-7                           |
| Information sources           | 6      | Specify all databases, registers, websites, organisations, reference lists and other sources searched or consulted to identify studies. Specify the date when each source was last searched or consulted.                                                                                            | p.6                             |
| Search strategy               | 7      | Present the full search strategies for all databases, registers and websites, including any filters and limits used.                                                                                                                                                                                 | Suppl. material                 |
| Selection process             | 8      | Specify the methods used to decide whether a study met the inclusion criteria of the review, including how many reviewers screened each record and each report retrieved, whether they worked independently, and if applicable, details of automation tools used in the process.                     | p.6-7                           |
| Data collection process       | 9      | Specify the methods used to collect data from reports, including how many reviewers collected data from each report, whether they worked independently, any processes for obtaining or confirming data from study investigators, and if applicable, details of automation tools used in the process. | p.7                             |
| Data items                    | 10a    | List and define all outcomes for which data were sought. Specify whether all results that were compatible with each outcome domain in each study were sought (e.g. for all measures, time points, analyses), and if not, the methods used to decide which results to collect.                        | p.7                             |
|                               | 10b    | List and define all other variables for which data were sought (e.g. participant and intervention characteristics, funding sources). Describe any assumptions made about any missing or unclear information.                                                                                         | p.7                             |
| Study risk of bias assessment | 11     | Specify the methods used to assess risk of bias in the included studies, including details of the tool(s) used, how many reviewers assessed each study and whether they worked independently, and if applicable, details of automation tools used in the process.                                    | p.7                             |
| Effect measures               | 12     | Specify for each outcome the effect measure(s) (e.g. risk ratio, mean difference) used in the synthesis or presentation of results.                                                                                                                                                                  | Not applicable                  |
| Synthesis methods             | 13a    | Describe the processes used to decide which studies were eligible for each synthesis (e.g. tabulating the study intervention characteristics and comparing against the planned groups for each synthesis (item #5)).                                                                                 | Not applicable                  |
|                               | 13b    | Describe any methods required to prepare the data for presentation or synthesis, such as handling of missing summary statistics, or data conversions.                                                                                                                                                | Not applicable                  |
|                               | 13c    | Describe any methods used to tabulate or visually display results of individual studies and syntheses.                                                                                                                                                                                               | Not applicable                  |
|                               | 13d    | Describe any methods used to synthesize results and provide a rationale for the choice(s). If meta-analysis was performed, describe the model(s), method(s) to identify the presence and extent of statistical heterogeneity, and software package(s) used.                                          | Not applicable                  |
|                               | 13e    | Describe any methods used to explore possible causes of heterogeneity among study results (e.g. subgroup analysis, meta-regression).                                                                                                                                                                 | Not applicable                  |
|                               | 13f    | Describe any sensitivity analyses conducted to assess robustness of the synthesized results.                                                                                                                                                                                                         | Not applicable                  |
| Reporting bias assessment     | 14     | Describe any methods used to assess risk of bias due to missing results in a synthesis (arising from reporting biases).                                                                                                                                                                              | Not applicable                  |
| Certainty                     | 15     | Describe any methods used to assess certainty (or confidence) in the body of evidence for an outcome.                                                                                                                                                                                                | Not applicable                  |



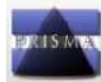

## PRISMA 2020 Checklist

| Section and Topic             | Item # | Checklist item                                                                                                                                                                                                                                                                       | Location where item is reported                                                                              |
|-------------------------------|--------|--------------------------------------------------------------------------------------------------------------------------------------------------------------------------------------------------------------------------------------------------------------------------------------|--------------------------------------------------------------------------------------------------------------|
| assessment                    |        |                                                                                                                                                                                                                                                                                      |                                                                                                              |
| <b>RESULTS</b>                |        |                                                                                                                                                                                                                                                                                      |                                                                                                              |
| Study selection               | 16a    | Describe the results of the search and selection process, from the number of records identified in the search to the number of studies included in the review, ideally using a flow diagram.                                                                                         | p.8 (and Figure 1)                                                                                           |
|                               | 16b    | Cite studies that might appear to meet the inclusion criteria, but which were excluded, and explain why they were excluded.                                                                                                                                                          | Figure 1                                                                                                     |
| Study characteristics         | 17     | Cite each included study and present its characteristics.                                                                                                                                                                                                                            | Table 1 (and suppl. Table S1)                                                                                |
| Risk of bias in studies       | 18     | Present assessments of risk of bias for each included study.                                                                                                                                                                                                                         | p.8                                                                                                          |
| Results of individual studies | 19     | For all outcomes, present, for each study: (a) summary statistics for each group (where appropriate) and (b) an effect estimate and its precision (e.g. confidence/credible interval), ideally using structured tables or plots.                                                     | Not applicable                                                                                               |
| Results of syntheses          | 20a    | For each synthesis, briefly summarise the characteristics and risk of bias among contributing studies.                                                                                                                                                                               | Not applicable                                                                                               |
|                               | 20b    | Present results of all statistical syntheses conducted. If meta-analysis was done, present for each the summary estimate and its precision (e.g. confidence/credible interval) and measures of statistical heterogeneity. If comparing groups, describe the direction of the effect. | Not applicable                                                                                               |
|                               | 20c    | Present results of all investigations of possible causes of heterogeneity among study results.                                                                                                                                                                                       | Not applicable                                                                                               |
|                               | 20d    | Present results of all sensitivity analyses conducted to assess the robustness of the synthesized results.                                                                                                                                                                           | Not applicable                                                                                               |
| Reporting biases              | 21     | Present assessments of risk of bias due to missing results (arising from reporting biases) for each synthesis assessed.                                                                                                                                                              | Not applicable                                                                                               |
| Certainty of evidence         | 22     | Present assessments of certainty (or confidence) in the body of evidence for each outcome assessed.                                                                                                                                                                                  | Not applicable                                                                                               |
| <b>DISCUSSION</b>             |        |                                                                                                                                                                                                                                                                                      |                                                                                                              |
| Discussion                    | 23a    | Provide a general interpretation of the results in the context of other evidence.                                                                                                                                                                                                    | p.17                                                                                                         |
|                               | 23b    | Discuss any limitations of the evidence included in the review.                                                                                                                                                                                                                      | p.17-18                                                                                                      |
|                               | 23c    | Discuss any limitations of the review processes used.                                                                                                                                                                                                                                | p.17-18                                                                                                      |
|                               | 23d    | Discuss implications of the results for practice, policy, and future research.                                                                                                                                                                                                       | p.17                                                                                                         |
| <b>OTHER INFORMATION</b>      |        |                                                                                                                                                                                                                                                                                      |                                                                                                              |
| Registration and protocol     | 24a    | Provide registration information for the review, including register name and registration number, or state that the review was not registered.                                                                                                                                       | Not registered                                                                                               |
|                               | 24b    | Indicate where the review protocol can be accessed, or state that a protocol was not prepared.                                                                                                                                                                                       | Registration on PROSPERO (CRD42020221973)                                                                    |
|                               | 24c    | Describe and explain any amendments to information provided at registration or in the protocol.                                                                                                                                                                                      | Adaptation of the framework used to analyze the data to better suit cardiovascular medications deprescribing |
| Support                       | 25     | Describe sources of financial or non-financial support for the review, and the role of the funders or sponsors in the review.                                                                                                                                                        | Swiss National                                                                                               |

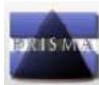

## PRISMA 2020 Checklist

| Section and Topic                              | Item # | Checklist item                                                                                                                                                                                                                             | Location where item is reported                                                                                          |
|------------------------------------------------|--------|--------------------------------------------------------------------------------------------------------------------------------------------------------------------------------------------------------------------------------------------|--------------------------------------------------------------------------------------------------------------------------|
|                                                |        |                                                                                                                                                                                                                                            | Science Foundation Grant IICT 33IC30-193052; grant from the College of General Internal Medicine (Fribourg, Switzerland) |
| Competing interests                            | 26     | Declare any competing interests of review authors.                                                                                                                                                                                         | None                                                                                                                     |
| Availability of data, code and other materials | 27     | Report which of the following are publicly available and where they can be found: template data collection forms; data extracted from included studies; data used for all analyses; analytic code; any other materials used in the review. | Available on demand                                                                                                      |

From: Page MJ, McKenzie JE, Bossuyt PM, Boutron I, Hoffmann TC, Mulrow CD, et al. The PRISMA 2020 statement: an updated guideline for reporting systematic reviews. *BMJ* 2021;372:n71. doi: 10.1136/bmj.n71

For more information, visit: <http://www.prisma-statement.org/>

# BMJ Open

## Barriers and facilitators to deprescribing of cardiovascular medications: a systematic review

|                                 |                                                                                                                                                                                                                                                                                                                                                    |
|---------------------------------|----------------------------------------------------------------------------------------------------------------------------------------------------------------------------------------------------------------------------------------------------------------------------------------------------------------------------------------------------|
| Journal:                        | <i>BMJ Open</i>                                                                                                                                                                                                                                                                                                                                    |
| Manuscript ID                   | bmjopen-2022-061686.R1                                                                                                                                                                                                                                                                                                                             |
| Article Type:                   | Original research                                                                                                                                                                                                                                                                                                                                  |
| Date Submitted by the Author:   | 13-Jun-2022                                                                                                                                                                                                                                                                                                                                        |
| Complete List of Authors:       | Brunner, Laureline; University of Bern, Département des Vulnérabilités Rodondi, Nicolas; Inselspital Universitätsspital Bern; Universität Bern Berner Institut für Hausarztmedizin<br>Aubert, Carole; University of Bern, Institute for Primary Health Care (BIHAM); Inselspital University Hospital Bern, Department of General Internal Medicine |
| <b>Primary Subject Heading</b>: | Cardiovascular medicine                                                                                                                                                                                                                                                                                                                            |
| Secondary Subject Heading:      | Cardiovascular medicine                                                                                                                                                                                                                                                                                                                            |
| Keywords:                       | Adult cardiology < CARDIOLOGY, GERIATRIC MEDICINE, PRIMARY CARE, QUALITATIVE RESEARCH, VASCULAR MEDICINE                                                                                                                                                                                                                                           |
|                                 |                                                                                                                                                                                                                                                                                                                                                    |

SCHOLARONE™  
Manuscripts



I, the Submitting Author has the right to grant and does grant on behalf of all authors of the Work (as defined in the below author licence), an exclusive licence and/or a non-exclusive licence for contributions from authors who are: i) UK Crown employees; ii) where BMJ has agreed a CC-BY licence shall apply, and/or iii) in accordance with the terms applicable for US Federal Government officers or employees acting as part of their official duties; on a worldwide, perpetual, irrevocable, royalty-free basis to BMJ Publishing Group Ltd ("BMJ") its licensees and where the relevant Journal is co-owned by BMJ to the co-owners of the Journal, to publish the Work in this journal and any other BMJ products and to exploit all rights, as set out in our [licence](#).

The Submitting Author accepts and understands that any supply made under these terms is made by BMJ to the Submitting Author unless you are acting as an employee on behalf of your employer or a postgraduate student of an affiliated institution which is paying any applicable article publishing charge ("APC") for Open Access articles. Where the Submitting Author wishes to make the Work available on an Open Access basis (and intends to pay the relevant APC), the terms of reuse of such Open Access shall be governed by a Creative Commons licence – details of these licences and which [Creative Commons](#) licence will apply to this Work are set out in our licence referred to above.

Other than as permitted in any relevant BMJ Author's Self Archiving Policies, I confirm this Work has not been accepted for publication elsewhere, is not being considered for publication elsewhere and does not duplicate material already published. I confirm all authors consent to publication of this Work and authorise the granting of this licence.

# 1                    1                    **Barriers and facilitators to deprescribing of cardiovascular** 2 3 4                    2                    **medications: a systematic review** 5 6                    3 7

8                    4                    Laureline Brunner,<sup>1</sup> Nicolas Rodondi, MD, MAS,<sup>1,2</sup> Carole Elodie Aubert, MD, MSc,<sup>1,2</sup>  
9  
10                    5

11                    6                    <sup>1</sup> Institute of Primary Health Care (BIHAM), University of Bern, Bern, Switzerland  
12

13                    7                    <sup>2</sup> Department of General Internal Medicine, Inselspital, Bern University Hospital, University of  
14                    8                    Bern, Bern, Switzerland  
15

16                    9  
17  
18                    10                    Running title: Deprescribing cardiovascular medications  
19

20                    11  
21  
22                    12                    Corresponding author:  
23

24                    13                    Carole E. Aubert, Department of General Internal Medicine, Inselspital, Bern University  
25                    14                    Hospital, University of Bern, Freiburgstrasse, CH-3010 Bern, Switzerland.  
26                    15                    carole.aubert@biham.unibe.ch  
27  
28  
29  
30  
31

32                    18                    Number of tables and figures: 4  
33

34                    19                    Abstract word count: 257  
35

36                    20                    Word count: 3,803  
37  
38  
39  
40  
41  
42  
43  
44  
45  
46  
47  
48  
49  
50  
51  
52  
53  
54  
55  
56  
57  
58  
59  
60

1  
2  
3 29 **ABSTRACT**  
4

5 30 **Objective:** To synthesize the current knowledge on barriers and facilitators to deprescribing  
6  
7 31 cardiovascular medications (CVMs) at the levels of patients, informal caregivers, and  
8  
9 32 healthcare providers (HCPs).  
10

11  
12 33 **Design/Setting:** We conducted a systematic review of studies exploring/assessing patient,  
13  
14 34 informal caregiver and/or HCP barriers and/or facilitators to deprescribing CVMs.  
15

16  
17 35 **Data sources:** Ovid/MEDLINE and Embase from January 2003 to November 2021.  
18

19 36 **Data extraction and synthesis:** We performed a deductive thematic analysis based on the  
20  
21 37 framework of specific barriers and facilitators to deprescribing CVMs created by Goyal et al.  
22  
23 38 We added a quantification of the occurrence of categories and themes in the selected articles to  
24  
25 39 identify the resounding themes that indicate the greater impetus to address in future research.  
26  
27

28 40 **Results:** Most frequent deprescribing barriers for patients, informal caregivers and HCPs  
29  
30 41 included uncertainty due to lack of evidence regarding CVM deprescribing, fear of negative  
31  
32 42 consequences following deprescribing, and social influences. A frequently reported facilitator  
33  
34 43 to deprescribing, especially for patients and informal caregivers, was the occurrence of ADEs.  
35  
36 44 Another frequently reported facilitator for patients were dislike of CVMs. Necessity and benefit  
37  
38 45 of CVMs were seen as barriers or facilitators similarly by patients and HCPs.  
39  
40

41  
42 46 **Conclusion:** The differences in patient, informal caregiver and HCP regarding barriers and  
43  
44 47 facilitators to deprescribing CVMs stress the need for ground discussions about beliefs and  
45  
46 48 preferences of each stakeholder implicated in deprescribing decisions. Furthermore, HCP  
47  
48 49 uncertainty regarding CVM deprescribing highlights the need to provide HCPs with tools that  
49  
50 50 enable sharing the risks and benefits of deprescribing with patients and ensure a safe  
51  
52 51 deprescribing process.  
53

54  
55  
56 52 **Review registration on Prospero:** CRD42020221973  
57

58 53  
59

60 54

1  
2  
3 55 Strengths and limitations of this study:  
4

- 5 56 • Systematic review process with publication review; data extraction, analysis and  
6  
7  
8 57 synthesis; and quality assessment independently conducted by two independent  
9  
10 58 reviewers.  
11  
12 59 • Assessment of both quantitative and qualitative studies, providing complementary  
13  
14 60 information on barriers and facilitators to deprescribing.  
15  
16  
17 61 • In some studies, cardiovascular medications were part of, but not the focus of the  
18  
19 62 medications evaluated.  
20  
21  
22 63 • We did not assess specific classes of cardiovascular medications.  
23  
24 64

25  
26 65 Key words: cardiovascular medication, deprescribing, barriers, facilitators, older people  
27  
28  
29 66  
30  
31 67  
32  
33 68  
34  
35  
36  
37  
38  
39  
40  
41  
42  
43  
44  
45  
46  
47  
48  
49  
50  
51  
52  
53  
54  
55  
56  
57  
58  
59  
60

## 69 1. Introduction

70 In recent years, a less-is-more attitude regarding medication use has pushed to reevaluate the  
71 balance between medication risks and benefits.<sup>(1)</sup> In this context, the notion of *deprescribing*  
72 emerged, which is defined as the “systematic process of identifying and discontinuing  
73 [medications] in instances in which existing or potential harms outweigh existing or potential  
74 benefits within the context of an individual patient’s care goals, current level of functioning,  
75 life expectancy, values and preferences”.<sup>(2)</sup>

76 Cardiovascular medications (CVMs) belong to the most prescribed medications worldwide.<sup>(3)</sup>  
77 Although their use is beneficial in many cases, CVMs can also cause significant adverse drug  
78 events (ADEs), drug-drug, and drug-disease interactions.<sup>(4-6)</sup> However, the lack of evidence  
79 regarding benefits and risks of some CVMs in primary prevention in older people or in those  
80 with limited life expectancy, may lead to insecurity of patients and prescribers regarding CVM  
81 use and deprescribing.<sup>(1, 7-11)</sup>

82 In this context, the decision to deprescribe a CVM often becomes a preference-sensitive  
83 decision.<sup>(12, 13)</sup> A better understanding of barriers and facilitators experienced by all  
84 stakeholders involved in decision-making regarding CVM deprescribing may help to take  
85 informed decisions in line with individual values and preferences, and increase confidence in  
86 the decision made.<sup>(14, 15)</sup> While literature exists on deprescribing general medications, we do not  
87 know if barriers and facilitators differ for deprescribing CVMs.

88 With this systematic review, we aimed at synthesizing the current knowledge on barriers and  
89 facilitators to deprescribing CVMs at the levels of patients, informal caregivers, and healthcare  
90 providers (HCPs).

91  
92  
93  
94



## 95 2. Methods

96 We conducted a systematic review of studies assessing barriers and/or facilitators to  
97 deprescribing CVMs in adults. The review was registered on Prospero (CRD42020221973).

### 99 2.1. Ethics approval

100 An ethics approval was not needed for this study, since it was a review of the literature.

### 102 2.2. Types of studies and inclusion criteria

103 We included any type of publication – except editorials, conference abstracts and study  
104 protocols – discussing stakeholder barriers and/or facilitators regarding the process of  
105 deprescribing CVMs. Studies on prescribing, use, or adherence were not included. Studies  
106 reporting patients stopping CVMs without previous discussion with HCPs were considered as  
107 non-adherence studies and excluded.

### 109 2.3. Search strategy

110 We searched Ovid/MEDLINE and Embase from January 2003 to November 2021. We started  
111 the search in 2003 because it corresponds to the first mention of the term *deprescribing* in the  
112 literature.<sup>(16)</sup> We included studies published in English language and focusing on patients taking  
113 or having taken CVMs previously, and/or informal caregivers, and/or HCPs of such patients.  
114 We developed the 3 following concepts for our search strategy: 1) CVMs; 2) deprescribing; 3)  
115 barriers and facilitators. All three concepts were combined with the operator “and”. The detailed  
116 search strategy is provided in **Supplemental Material S1**.

117 LB and CEA independently reviewed all publications identified through the search strategy  
118 after removing duplicates. First, ineligible articles were excluded based on title/abstract.  
119 Second, full text of the remaining articles was reviewed to identify eligible studies. Reference  
120 lists of included publications were also searched for additional relevant articles (hand

1  
2  
3 121 searching). Reviews and meta-analyses were kept in the first selection, but only original studies  
4  
5 122 identified in the reference lists were included. For each step, LB and CEA resolved  
6  
7  
8 123 discrepancies by discussion.  
9

10 124

#### 11 12 125 2.4. Data extraction and analysis

13  
14 126 Eligible articles were imported in MAXQDA 2020 data analysis software (VERBI Software,  
15  
16  
17 127 Berlin, Germany). Extracted data included author(s), year of publication, country, study design,  
18  
19 128 setting, and population, and details on barriers and/or facilitators. Given the topic of this  
20  
21 129 systematic review, we conducted a qualitative rather than a quantitative synthesis of the results.  
22  
23 130 We performed a deductive thematic analysis to identify common and discrepant themes within  
24  
25 131 and between stakeholder categories.<sup>(17, 18)</sup> The thematic analysis was based on the framework  
26  
27 132 of specific barriers and facilitators to deprescribing CVMs created by Goyal et al.<sup>(4)</sup> This  
28  
29 133 framework, based on Reeve's framework of patient barriers and facilitators to deprescribing  
30  
31 134 medications,<sup>(19)</sup> includes the following categories: appropriateness of cessation, process of  
32  
33 135 cessation, dislike of medications, fear, uncertainty, and conflicting attitudes. We analyzed  
34  
35 136 patient and informal caregiver outputs together and HCP outputs separately, since we expected  
36  
37 137 to identify different barriers and facilitators. In an iterative process, we created themes within  
38  
39 138 the predefined categories. To identify the resounding themes that indicate the greater impetus  
40  
41 139 to address in future research, we added a quantitative aspect to our thematic analysis, in which  
42  
43 140 we identified the number of times each category and theme appeared in the selected studies.  
44  
45  
46  
47  
48

49 141

#### 50 51 142 2.5. Risk of bias and quality assessment

52  
53 143 LB and CA conducted the quality and risk of bias assessment separately using the Mixed  
54  
55 144 Methods Appraisal Tool (MMAT) 2018.<sup>(20, 21)</sup> The MMAT allows assessing the methodological  
56  
57 145 quality of studies included in a systematic review encompassing both qualitative and  
58  
59 146 quantitative data. Discussions were held until a consensus on quality of each study was reached.  
60

1  
2  
3 147 2.6. Patient and Public Involvement:  
4

5 148 Patients and Public were not involved in the design, conduct or reporting of this review, but in  
6  
7  
8 149 a follow-up project based on this review.  
9

10 150

11  
12 151 **3. Results**  
13

14 152 3.1. Study selection and characteristics  
15

16  
17 153 Among the 4,164 unique studies identified, 71 were included for full-text assessment (**Figure**  
18  
19 154 **1**). Among those, 16 fulfilled inclusion criteria. Through hand-searching, six additional studies  
20  
21 155 were included, leading to a total of 22 publications. Study characteristics are presented in  
22  
23 156 **Tables 1** and detailed in **Supplemental Material S2**.  
24  
25

26 157  
27  
28  
29  
30  
31  
32  
33  
34  
35  
36  
37  
38  
39  
40  
41  
42  
43  
44  
45  
46  
47  
48  
49  
50  
51  
52  
53  
54  
55  
56  
57  
58  
59  
60

158 **Table 1: main characteristics of studies reporting patient, informal caregiver and HCP barriers and facilitators to deprescribing CVMs**

| Patients and informal caregivers               | First author, publication year                | N population                        | Age                                                 | Studied CVM(s)                                                                           | Prevention type     |
|------------------------------------------------|-----------------------------------------------|-------------------------------------|-----------------------------------------------------|------------------------------------------------------------------------------------------|---------------------|
|                                                | Benson, 2005 (UK) <sup>(22)</sup>             | 38 patients                         | Any                                                 | Antihypertensives                                                                        | Unknown             |
|                                                | Brinton, 2018 (USA) <sup>(23)</sup>           | 5,014 patients                      | Mean age: 64 years                                  | Statins                                                                                  | Primary & secondary |
|                                                | Crutzen, 2020 (Netherlands) <sup>(24)</sup>   | 17 patients, 1 informal caregiver   | Median age: 78 years                                | Cardiometabolic medication                                                               | Primary & secondary |
|                                                | Goyal, 2020 (USA) <sup>(4)</sup>              | 10 patients                         | Median age: 80 years                                | β-blockers                                                                               | Primary & secondary |
|                                                | Jansen, 2019 (Australia) <sup>(25)</sup>      | 30 patients                         | ≥75 years                                           | Preventive CV medication                                                                 | Primary & secondary |
|                                                | Luymes, 2017 (Netherlands) <sup>(26)</sup>    | 33 patients                         | Mean age: 57 years                                  | Lipid-lowering drugs<br>Antihypertensives                                                | Primary             |
|                                                | Pickering, 2020 (USA) <sup>(27)</sup>         | 16 patients, 17 informal caregivers | Patients ≥ 65 years<br>Caregivers 22-69 years       | Unspecified (identified:<br>statins, antihypertensives,<br>antiplatelets, antidiabetics) | Primary & secondary |
|                                                | Qi, 2015 (Australia) <sup>(28)</sup>          | 180 patients                        | Median age: 78 years                                | Regular medications, statins                                                             | Primary & secondary |
|                                                | Tija, 2017 (USA) <sup>(29)</sup>              | 297 patients                        | Mean age: 72 years                                  | Statins                                                                                  | Primary & secondary |
| Van Bussel, 2019 (Netherlands) <sup>(30)</sup> | 15 patients                                   | Mean age: 81 years                  | Antihypertensives                                   | Primary                                                                                  |                     |
| HCPs                                           | First author, publication year                | N population                        | Characteristics of patients cared for by study HCPs |                                                                                          |                     |
|                                                |                                               |                                     | Age                                                 | Studies CVM(s)                                                                           | Prevention type     |
|                                                | Ailabouni, 2016 (New Zealand) <sup>(31)</sup> | 10 GPs                              | 83 years                                            | Antiplatelets, statin,<br>antidiabetics, diuretics, β-<br>blocker, ACE inhibitor         | Secondary           |
|                                                | Ailabouni, 2016 (New Zealand) <sup>(32)</sup> | 10 GPs                              | Unspecified (older pts)                             | Unspecified (identified:<br>statin and aspirin)                                          | Unknown             |
| Anderson, 2017 (Australia) <sup>(33)</sup>     | 32 GPs, 15 CPs                                | Unknown                             | Unspecified (identified:<br>statin)                 | Unknown                                                                                  |                     |

1  
2  
3  
4  
5  
6  
7  
8  
9  
10  
11  
12  
13  
14  
15  
16  
17  
18  
19  
20  
21  
22  
23  
24  
25  
26  
27  
28  
29  
30  
31  
32  
33  
34  
35  
36  
37  
38  
39  
40  
41  
42  
43  
44  
45  
46

|                                                    |                                                                                             |                                    |                                                                            |                        |
|----------------------------------------------------|---------------------------------------------------------------------------------------------|------------------------------------|----------------------------------------------------------------------------|------------------------|
| Geijteman, 2018 (Netherlands) <sup>(34)</sup>      | 174 GPs, 147 clinical specialists                                                           | 88 years                           | ACE inhibitor, statin, anticoagulant, diuretic, antidiabetic               | Secondary              |
| Goyal, 2020 (USA) <sup>(35)</sup>                  | 184 geriatricians, 182 general internists, 87 cardiologists                                 | 79 years                           | 4 CV medications                                                           | Unknown                |
| Green, 2019 (USA) <sup>(36)</sup>                  | 19 physicians, 2 nurse practitioners                                                        | Unspecified (older pts)            | Unspecified (identified: statins, oral anticoagulants, antidiabetics)      | Unknown                |
| Jansen, 2017 (Australia) <sup>(37)</sup>           | 25 GPs                                                                                      | ≥75 years                          | Preventive CV medication                                                   | Primary                |
| Thompson, 2020 (Denmark) <sup>(38)</sup>           | 11 GPs                                                                                      | ≥ 80 years                         | Statins                                                                    | Unknown                |
| Van Middelaar, 2020 (Netherlands) <sup>(39)</sup>  | 15 GPs                                                                                      | Unspecified (older pts)            | Antihypertensives                                                          | Unknown                |
| Van der Ploeg, 2018 (30 countries) <sup>(40)</sup> | 2250 GPs                                                                                    | ≥ 80 years                         | Statins                                                                    | Primary & secondary    |
| <b>First author, publication year</b>              | <b>N population</b>                                                                         | <b>Characteristics of patients</b> |                                                                            |                        |
|                                                    |                                                                                             | <b>Age</b>                         | <b>Studied CVM(s)</b>                                                      | <b>Prevention type</b> |
| Luymes, 2016 (Netherlands) <sup>(41)</sup>         | 10 GPs, 49 patients                                                                         | Median age: 55 years               | Antihypertensives, lipid-lowering drugs                                    | Primary                |
| Todd, 2016 (UK) <sup>(42)</sup>                    | 12 patients, 12 informal caregivers, 3 palliative consultants, 3 nurse practitioners, 6 GPs | Any                                | Unspecified (preventive medications, including statins, antihypertensives) | Unknown                |

**Abbreviations:** ACE inhibitors: angiotensin-converting enzyme inhibitors; CPs: community pharmacists; CV: cardiovascular; CVM(s): cardiovascular medication(s); GPs: general practitioners; pts: patients

### 165 3.2. Quality assessment

166 Details of each study quality assessment can be found in **Supplemental Material S3**. Of the  
167 15 qualitative studies included in this systematic review, 14 were deemed of good quality,<sup>(4, 22,</sup>  
168 24, 25, 27, 30, 31, 33, 36-39, 41, 42) while one lacked data to support interpretation of the results.<sup>(32)</sup> Five  
169 of the six included quantitative studies did not provide sample representative of the target  
170 population, as nonresponse was high, increasing the risk of nonresponse bias.<sup>(28, 29, 34, 35, 40)</sup> The  
171 sixth quantitative study provided few details on the method used for data analysis.<sup>(23)</sup> The only  
172 mixed methods study included failed to address divergences between quantitative and  
173 qualitative results.<sup>(26)</sup> We did not exclude any study based on the quality assessment, as our aim  
174 was to describe all available data regarding barriers and facilitators to deprescribing CVMs.

### 176 3.3. Thematic analysis

177 Following the framework of Goyal et al.,<sup>(4)</sup> seven categories were created to describe patient  
178 and HCP main barriers and facilitators to deprescribing CVMs. Categories one and four were  
179 divided into three and two themes respectively. Differences between patients, informal  
180 caregivers and HCPs, as well as across HCP categories, are highlighted when relevant. HCPs  
181 other than general practitioners (GPs, including general internists and family medicine  
182 clinicians) are regrouped under the term “specialists”. Differences across specialties are  
183 highlighted when relevant. Of the 22 articles, all encompassed barriers and facilitators to  
184 deprescribing CVMs, except for one (Brinton et al. reported only facilitators).<sup>(23)</sup> Barriers and  
185 facilitators did not appear to differ significantly between studies assessing different CVMs. All  
186 barriers and facilitators according to categories, themes and stakeholders, are displayed in  
187 **Table 2**. The facilitators most frequently mentioned by patients were ADE occurrence and  
188 dislike, respectively reported in seven and nine of the 12 articles studying patient and informal  
189 caregiver barriers and facilitators, as shown in **Table 3**. The facilitator most commonly reported  
190 by HCPs was the lack of benefit (reported in seven of the 12 articles studying HCP barriers and

1  
2  
3 191 facilitators). One of the barriers most frequently cited by patients/informal caregivers and HCPs  
4  
5 192 was fear, reported in seven of the 12 articles on patients, informal caregivers and HCPs. Social  
6  
7 193 influences were another barrier frequently mentioned by HCPs (reported in 10 of the 12  
8  
9 194 articles). Additional frequent barriers were uncertainty for HCPs (in seven of the 12 articles),  
10  
11 195 and perceived benefit and social influences for patients and informal caregivers (in six of the  
12  
13 196 12 articles).  
14  
15  
16  
17  
18  
19  
20  
21  
22  
23  
24  
25  
26  
27  
28  
29  
30  
31  
32  
33  
34  
35  
36  
37  
38  
39  
40  
41  
42  
43  
44  
45  
46  
47  
48  
49  
50  
51  
52  
53  
54  
55  
56  
57  
58  
59  
60

For peer review only

197 **Table 2: Summary of categories, themes and codes of barriers and facilitators to deprescribing CVMs**

| Categories      | Themes       | Barriers or facilitators                                                                                                               | Patients and/or informal caregivers                                                                                                                                                                            | HCPs                                                                                                                                 | HCPs and patients and/or informal caregivers                                    |
|-----------------|--------------|----------------------------------------------------------------------------------------------------------------------------------------|----------------------------------------------------------------------------------------------------------------------------------------------------------------------------------------------------------------|--------------------------------------------------------------------------------------------------------------------------------------|---------------------------------------------------------------------------------|
| Appropriateness | Necessity    | Facilitators                                                                                                                           | Low CV risk<br>Disease under control<br>Trigger disappearance                                                                                                                                                  | Primary prevention<br>Age as single CVRF                                                                                             |                                                                                 |
|                 |              | Barriers                                                                                                                               | CVM linked to survival                                                                                                                                                                                         | Unhealthy lifestyle<br>Many CVRFs                                                                                                    | Past CV event<br>Family history of CVD<br>CVM should be taken until end of life |
|                 | Benefit      | Facilitators                                                                                                                           | Robustness                                                                                                                                                                                                     | Short life expectancy<br>Cognitive impairment<br>Nursing home patients<br>Palliative patients                                        | No objective improvement under CVM<br>No subjective improvement under CVM       |
|                 |              | Barriers                                                                                                                               | Frailty<br>CVM use = active contribution to health<br>CVM use = having control over one's self                                                                                                                 | Good physical & cognitive function<br>Few comorbidities                                                                              | Objective improvement under CVM<br>Subjective improvement under CVM             |
|                 | ADEs         | Facilitators                                                                                                                           | ADEs foster deprescribing discussion with HCP                                                                                                                                                                  |                                                                                                                                      | Reduction in QOL through ADEs                                                   |
|                 |              | Barriers                                                                                                                               | ADEs balanced against reasons to take CVMs                                                                                                                                                                     | ADEs in patients with CVD                                                                                                            | No ADE, no symptom from disease                                                 |
| Fear            | Facilitators | Fear of ADEs<br>Fear of becoming dependent on CVMs                                                                                     |                                                                                                                                                                                                                |                                                                                                                                      |                                                                                 |
|                 | Barriers     | Fear of deprescribing due to severity of underlying disease<br>Fear of experiencing a CV event after deprescribing & becoming a burden | Feeling of giving up on patients                                                                                                                                                                               | Fear of CV event, return of previous condition, health deterioration following deprescribing<br>Fear of shorter lifespan without CVM |                                                                                 |
| Dislike         |              | Facilitators                                                                                                                           | General dislike of medications<br>Medication-associated costs<br>Living a long life without using CVMs<br>Pride in not taking medications<br>CVMs = poison<br>CVMs = bad for health<br>Therapeutic competition |                                                                                                                                      |                                                                                 |



|             |                      |                              |                                                                                                                                     |                                                                                                                                                                                 |                                                                              |
|-------------|----------------------|------------------------------|-------------------------------------------------------------------------------------------------------------------------------------|---------------------------------------------------------------------------------------------------------------------------------------------------------------------------------|------------------------------------------------------------------------------|
| Influences  | Previous experiences | Facilitators                 |                                                                                                                                     |                                                                                                                                                                                 | Positive previous experience with deprescribing (QOL improvement, no stroke) |
|             |                      | Barriers                     |                                                                                                                                     |                                                                                                                                                                                 | Negative previous experience with deprescribing (restart medication, stroke) |
|             | Social influences    | Facilitators                 | HCPs (especially GP) advising deprescribing                                                                                         | Patient's preferences                                                                                                                                                           |                                                                              |
|             |                      | Barriers                     | HCPs (especially GP) advising against deprescribing                                                                                 | Patient's preferences (reluctance)<br>Patient's lack of understanding<br>Patient's family wants CVMs<br>Specialist prescription<br>Interference with other HCPs' treatment plan |                                                                              |
| Process     |                      | Facilitators                 | Temporary deprescribing trial<br>Possibility of CVM resumption                                                                      |                                                                                                                                                                                 | Dose-lowering scheme<br>Close monitoring                                     |
|             |                      | Barriers                     |                                                                                                                                     | Lack of remuneration for close monitoring                                                                                                                                       | Time constraints                                                             |
| Uncertainty |                      | Facilitators                 |                                                                                                                                     |                                                                                                                                                                                 | Uncertainty about possible consequences of taking CVMs                       |
|             |                      | Barriers                     | Lack of understanding of CVDs and risk reduction with CVMs<br>Uncertainty about risks and benefits<br>Conflicting treatment targets | Lack of evidence on deprescribing<br>Uncertainty about when to deprescribe<br>Uncertainty about risk-benefit balance<br>Limited training on deprescribing                       | Unknown consequences of deprescribing                                        |
| Ambivalence |                      | Facilitators and/or barriers | Concern about CVM effect on health vs consequences of not taking CVMs<br>Aversion towards CVMs vs obligation to take CVMs           |                                                                                                                                                                                 |                                                                              |

**Abbreviations:** ADEs: adverse drug events; CV: cardiovascular; CVD: cardiovascular disease; CVM: cardiovascular medication; CVRF: cardiovascular risk factor; GP: general practitioner; HCPs: healthcare providers; QOL: quality of life

202 **Table 3: Occurrence of categories and themes in the included studies**

| Author                                                        | Facilitators    |         |      |      |         |            |     |         | Barriers    |                 |         |      |      |            |     |         | Facilitators & barriers |             |             |
|---------------------------------------------------------------|-----------------|---------|------|------|---------|------------|-----|---------|-------------|-----------------|---------|------|------|------------|-----|---------|-------------------------|-------------|-------------|
|                                                               | Appropriateness |         |      | Fear | Dislike | Influences |     | Process | Uncertainty | Appropriateness |         |      | Fear | Influences |     | Process |                         | Uncertainty | Ambivalence |
|                                                               | Necessity       | Benefit | ADEs |      |         | Social     | Exp |         |             | Necessity       | Benefit | ADEs |      | Social     | Exp |         |                         |             |             |
| <b>Patients and informal caregivers</b>                       |                 |         |      |      |         |            |     |         |             |                 |         |      |      |            |     |         |                         |             |             |
| Benson <sup>(22)</sup>                                        |                 |         | x    |      |         |            | x   |         |             |                 | x       | x    |      |            |     |         |                         |             |             |
| Brinton <sup>(23)</sup>                                       |                 | x       | x    |      | x       |            |     |         |             |                 |         |      |      |            |     |         |                         |             |             |
| Crutzen <sup>(24)</sup>                                       |                 |         | x    | x    | x       | x          | x   | x       |             |                 | x       |      |      | x          | x   | x       |                         |             |             |
| Goyal <sup>(4)</sup>                                          |                 | x       | x    |      | x       |            |     | x       |             | x               | x       |      |      |            |     | x       |                         | x           |             |
| Jansen <sup>(25)</sup>                                        |                 |         | x    |      | x       | x          |     | x       |             | x               | x       |      |      |            |     |         |                         |             |             |
| Luymes <sup>(26)</sup>                                        | x               |         |      |      | x       | x          |     |         |             | x               |         |      | x    | x          |     |         |                         |             |             |
| Pickering <sup>(27)</sup>                                     |                 |         | x    |      | x       | x          |     |         |             |                 | x       |      | x    | x          |     |         |                         |             |             |
| Qi <sup>(28)</sup>                                            |                 | x       |      | x    |         | x          |     |         |             |                 | x       |      |      |            |     |         |                         |             |             |
| Tija <sup>(29)</sup>                                          |                 |         |      | x    |         |            |     |         |             | x               |         |      |      |            |     |         |                         |             |             |
| Van Busse <sup>(30)</sup>                                     |                 |         | x    |      | x       |            |     |         |             |                 |         | x    | x    | x          |     |         | x                       | x           |             |
| <b>Healthcare providers</b>                                   |                 |         |      |      |         |            |     |         |             |                 |         |      |      |            |     |         |                         |             |             |
| Ailabouni <sup>(31)</sup>                                     |                 |         |      |      |         |            | x   |         |             |                 |         |      | x    | x          |     |         |                         | x           |             |
| Ailabouni <sup>(32)</sup>                                     |                 |         | x    |      |         |            |     | x       |             |                 | x       |      | x    | x          |     |         |                         |             |             |
| Anderson <sup>(33)</sup>                                      |                 | x       | x    |      |         | x          | x   | x       | x           |                 | x       |      | x    | x          | x   | x       | x                       |             |             |
| Geijteman <sup>(34)</sup>                                     |                 | x       | x    |      |         |            |     |         |             |                 |         |      |      |            | x   | x       |                         |             |             |
| Goyal <sup>(35)</sup>                                         |                 | x       | x    |      |         |            |     |         |             |                 |         |      | x    | x          |     | x       | x                       |             |             |
| Green <sup>(36)</sup>                                         |                 | x       |      |      |         |            |     |         |             |                 |         |      | x    | x          | x   | x       | x                       |             |             |
| Jansen <sup>(37)</sup>                                        | x               | x       |      |      |         | x          |     |         |             |                 | x       |      |      | x          |     |         |                         | x           |             |
| Thompson <sup>(38)</sup>                                      |                 | x       |      |      |         | x          |     |         |             | x               | x       |      |      |            |     |         |                         |             |             |
| Van Middelaar <sup>(39)</sup>                                 |                 |         | x    |      |         | x          | x   |         |             | x               | x       | x    | x    | x          | x   | x       |                         | x           |             |
| Van der Ploeg <sup>(40)</sup>                                 | x               | x       |      |      |         | x          |     |         |             |                 |         | x    |      | x          |     |         |                         |             |             |
| <b>Patients, informal caregivers and healthcare providers</b> |                 |         |      |      |         |            |     |         |             |                 |         |      |      |            |     |         |                         |             |             |
| Luyme <sup>(41)</sup>                                         | x               |         |      |      | x       | x          |     | x       |             | x               |         |      | x    | x          | x   | x       |                         |             |             |
| Todd <sup>(42)</sup>                                          |                 |         |      |      | x       |            |     |         |             | x               |         |      |      | x          |     |         |                         |             |             |

203

204 **Legend:** “x” means that the category/theme was mentioned in the article.

205 **Abbreviations:** exp: previous experiences; social: social influences

### 206 **3.3.1. Appropriateness**

207 Patient and HCP agreement or disagreement with appropriateness of CVM deprescribing were  
208 based on three main themes: CVM necessity, CVM benefit, and ADE occurrence. While CVM  
209 necessity and benefit were almost as frequently mentioned as facilitators than as barriers, ADE  
210 occurrence was clearly reported as a facilitator to deprescribing (in 12 of the 22 articles).

#### 212 **3.3.1.1 Necessity**

213 Patients in three studies considered taking CVMs as a necessity, even an obligation, especially  
214 in case of past cardiovascular (CV) event or family history of cardiovascular disease (CVD).<sup>(25,</sup>  
215 <sup>26, 41)</sup> This view was shared by GPs in two studies, who also deemed necessary to treat patients  
216 with unhealthy lifestyle, or presenting many cardiovascular risk factors (CVRF).<sup>(39, 41)</sup> Patients  
217 and one GP even stated that CVMs should not be stopped until the end of life,<sup>(25, 29, 38, 42)</sup> while  
218 other patients considered CVMs linked to their survival.<sup>(4)</sup> Contrastively, patients at low CV  
219 risk and GPs treating patients in primary prevention or patients without any CVRF other than  
220 age, considered CVMs less necessary.<sup>(26, 37, 40, 41)</sup> Some patients questioned the continuous  
221 necessity of their CVM, as they felt that their disease was well-controlled.<sup>(30, 41)</sup>

#### 223 **3.3.1.2 Benefit**

224 GPs were more inclined to continue treating patients with good physical and cognitive function  
225 or few comorbidities, especially if they presented no CVM-related ADEs, expecting them to  
226 derive a higher benefit from CVMs.<sup>(32, 33, 37-39)</sup> In contrast, GPs and specialists considered  
227 patients with a short life expectancy, cognitive impairment, or living in palliative/nursing homes  
228 less likely to benefit from CVMs.<sup>(33-38, 40)</sup> They felt that, in these cases, prolonging life or  
229 avoiding a CV event should not be the main objective of care.<sup>(37)</sup> However, frail patients were  
230 less willing to stop their statin than robust ones.<sup>(28)</sup>

1  
2  
3 231 Some patients and informal caregivers also considered CVMs to be beneficial when they saw  
4  
5 232 an objective (e.g., cholesterol levels) or subjective (e.g., less dizziness) improvement under  
6  
7 233 treatment.<sup>(4, 22, 24, 27)</sup> Some patients also considered that taking CVMs enabled them to make an  
8  
9 234 active contribution to their health, and to have control over themselves and the future.<sup>(25)</sup>

235

### 236 3.3.1.3 ADEs

237 Patients, informal caregivers and HCPs reported ADEs as one of the main reasons to consider  
238 stopping CVMs, especially if ADEs were associated with a reduction in quality of life.<sup>(4, 22-25,</sup>  
239 <sup>27, 30, 32-35, 39)</sup> Patients usually compliant with medications considered ADEs as a reason to  
240 discuss deprescribing with their GP.<sup>(25, 30)</sup> Patients considering taking CVMs as a routine to stay  
241 healthy were still willing to discontinue their CVMs in case of ADEs.<sup>(25, 30)</sup> Contrastively, some  
242 patients continued taking their CVMs after balancing ADEs against reasons to take CVMs (i.e.,  
243 CVM perceived benefit, minor ADEs.<sup>(22)</sup> When patients were asymptomatic and had no ADE,  
244 patients and GPs were unwilling to deprescribe CVMs.<sup>(30, 39)</sup> When ADEs occurred in patients  
245 with CVD, GPs were also unwilling to deprescribe.<sup>(40)</sup>

246

### 247 3.2. Fear

248 Fear of consequences following CVM deprescribing was reported in 13 studies as a barrier to  
249 deprescribing. In multiple studies, patients stated their fear of a return of the previous condition,  
250 health deterioration, becoming a burden, or a shorter lifespan following deprescribing.<sup>(4, 25-27, 30,</sup>  
251 <sup>41)</sup> Some linked this fear with the perceived severity of their disease.<sup>(24, 27)</sup> These concerns were  
252 shared by informal caregivers. GPs and specialists feared harming patients by deprescribing  
253 (e.g., occurrence of CV event with functional limitation, death),<sup>(31-33, 35, 36, 39, 41)</sup> and giving  
254 patients the feeling that they were giving up on them, especially by deprescribing towards the  
255 end of life, a feeling not shared by patients.<sup>(29, 31, 34, 36, 39)</sup>

1  
2  
3 256 Conversely, patients fearing ADEs or becoming “dependent” on their CVMs were more willing  
4  
5 257 to deprescribe.<sup>(24, 28)</sup> HCPs did not report fear as a facilitator.  
6  
7  
8 258

### 9 10 259 **3.3. Dislike**

11  
12 260 CVM dislike was one of the most common facilitators to deprescribing for patients and informal  
13  
14 261 caregivers, but not for HCPs. Patients stated a general dislike of medications or explained  
15  
16 262 feeling burdened by the number of medications (CVMs and others), or medication-associated  
17  
18 263 costs.<sup>(4, 23-25, 27, 30, 41, 42)</sup> Other patients were aiming at living a long life without using  
19  
20 264 medications, or derived a personal pride of not taking medications.<sup>(25, 26)</sup> Some patients and  
21  
22 265 informal caregivers considered CVMs as “not good for health”<sup>(24)</sup> or despised CVMs that  
23  
24 266 created therapeutic competition (i.e., helping one condition while worsening another one) or  
25  
26 267 which administration was complicated or disrupted daily routine (e.g., glycaemia before insulin  
27  
28 268 injections).<sup>(4, 27)</sup>  
29  
30  
31  
32

33 269

### 34 35 270 **3.4. Influences**

36  
37 271 Patient and HCP opinions towards deprescribing were shaped by their previous experiences in  
38  
39 272 deprescribing CVMs, and by social influences. While social influences were reported as a  
40  
41 273 facilitator as frequently than as a barrier by patients and informal caregivers, they were more  
42  
43 274 frequently reported as a barrier to deprescribing by HCPs.  
44  
45  
46  
47  
48

47 275

#### 48 49 276 **3.4.1 Previous experiences**

50  
51 277 Patients and HCPs with a positive previous experience with CVM deprescribing were more  
52  
53 278 amenable to deprescribe again, as opposed to those with a negative previous experience.<sup>(4, 24, 31,</sup>  
54  
55 279 <sup>33, 36, 39, 41)</sup> GPs considered patients feeling better or with improved quality of life after  
56  
57 280 deprescribing as positive experiences,<sup>(31, 39)</sup> and having to restart medications after  
58  
59  
60

1  
2  
3 281 deprescribing as a negative experience.<sup>(39)</sup> For statins, occurrence or absence of stroke after  
4  
5 282 deprescribing influenced GPs' and specialists' further actions.<sup>(33, 36)</sup>  
6  
7  
8 283

### 10 284 **3.4.2 Social influences**

11  
12 285 HCPs influenced patients' and informal caregivers' opinion on deprescribing.<sup>(27, 28)</sup> Patients  
13  
14 286 were willing to stop one or more CVM if this was proposed by a trusting physician.<sup>(24)</sup> Patients  
15  
16 287 especially trusted their GP because of their knowledge and the fact that they knew them well.<sup>(25,</sup>  
17  
18 288 <sup>26, 30, 41)</sup> Some patients also recognized their dependency towards their GP and highlighted their  
19  
20 289 authority, feeling that it would be inappropriate to discuss their evaluation.<sup>(30)</sup> Others were  
21  
22 290 waiting for their GP to start discussions about preferences, or were happy to follow their  
23  
24 291 recommendations.<sup>(25, 30)</sup>  
25  
26  
27

28 292 GPs accounted for patient preferences.<sup>(33, 37-40)</sup> They considered deprescribing in patients  
29  
30 293 wanting to take less medications.<sup>(37, 38)</sup> They continued CVMs in patients expecting longevity  
31  
32 294 or whose family was urging for medication continuation.<sup>(37)</sup> GPs were also unwilling to  
33  
34 295 deprescribe CVMs prescribed by specialists, even if they questioned the indication.<sup>(31-33, 37, 41)</sup>  
35  
36 296 Specialists were concerned by interfering with other HCPs' treatment plan.<sup>(35, 36)</sup> They were  
37  
38 297 also unwilling to deprescribe when communication with other HCPs was suboptimal or when  
39  
40 298 patients were reluctant or could not understand the concept of deprescribing.<sup>(35, 42)</sup>  
41  
42  
43  
44 299

### 46 300 **3.5. Process**

47  
48 301 The process required to deprescribe CVMs was more frequently reported as a barrier than as a  
49  
50 302 facilitator by HCPs.  
51

52  
53 303 HCPs and patients reported time constraint, such as lacking time to review medication lists or  
54  
55 304 to discuss CVMs, as a barrier to CVM deprescribing.<sup>(24, 34-36, 39)</sup>  
56  
57

58 305 For patients, a dose-lowering scheme, a close monitoring after deprescribing and a temporary  
59  
60 306 stopping trial with possibility of medication resumption facilitated the deprescribing process.<sup>(4,</sup>

1  
2  
3 307 24, 25, 41) GPs also viewed gradual CVM discontinuation as a facilitator to deprescribing,  
4  
5 308 especially when they were unsure about CVM risk/benefit ratio.<sup>(32,33)</sup> However, they considered  
6  
7 309 the lack of remuneration for the close follow-up needed during gradual discontinuation as a  
8  
9 310 barrier.<sup>(33)</sup>

311

### 312 3.6. Uncertainty

313 As shown in **Table 3**, uncertainty was cited more often in HCP than patient/informal caregiver  
314 articles, acting almost exclusively as a barrier to deprescribing. HCPs formulated the lack of  
315 evidence about CVM deprescribing as a barrier, especially in older patients or those with  
316 dementia.<sup>(31, 35, 36)</sup> GPs found complicated to know when to deprescribe preventive medications  
317 – especially in patients neither frail nor robust<sup>(31, 39)</sup> – and how to balance CVM harms and  
318 benefits when approaching deprescribing.<sup>(37)</sup> One clinical pharmacist explained having  
319 difficulties making professional recommendations about statin deprescribing in older  
320 patients.<sup>(33)</sup> Specialists regretted the limited training on deprescribing.<sup>(35)</sup>

321 Patients expressed a lack of understanding of CVDs and risk reduction with CVMs, as well as  
322 uncertainty regarding potential risks and benefits of CVMs, thus feeling uncertain about the  
323 value of deprescribing.<sup>(4, 24, 30)</sup> They were also confused by conflicting treatment targets  
324 mentioned by HCPs.<sup>(24)</sup>

325 Some HCPs and patients also felt uneasy about the uncertainty surrounding possible  
326 consequences of CVM deprescribing.<sup>(33, 34, 41)</sup> This led to “therapeutic inertia”, even in case of  
327 unclear benefits of pursuing CVMs.<sup>(36)</sup> On the contrary, GPs and clinical pharmacists feeling  
328 uneasy about possible long-term consequences of taking CVMs were more willing to  
329 deprescribe.<sup>(33)</sup>

330

331

332

### 333 **3.7. Ambivalence**

334 Patients expressed ambivalence about CVM use, prompting them to wish CVM continuation  
335 and deprescribing concurrently. They were concerned about the effects of CVMs on their  
336 health, but also about what could happen if they did not take them.<sup>(4)</sup> They also showed aversion  
337 towards CVMs coupled with a feeling of obligation to take them.<sup>(4, 30)</sup> HCPs did not express  
338 ambivalence.

## 340 **4. Discussion**

341 In this systematic review, we provided an overview of barriers and facilitators to deprescribing  
342 CVMs, from the point of view of patients, informal caregivers and HCPs. Barriers and  
343 facilitators could be classified in the following categories: appropriateness, fear, dislike,  
344 influences, process, uncertainty, and ambivalence. Appropriateness was divided into three  
345 themes (necessity, benefit, ADEs), and influences into two (previous experiences, social  
346 influences). Frequent deprescribing barriers for both HCPs and patients/informal caregivers  
347 included influences of others on the decision, and fear of negative consequences following  
348 CVM deprescribing. Another barrier frequently mentioned by HCPs was the uncertainty to  
349 deprescribe due to the lack of evidence regarding CVM deprescribing. The occurrence of ADEs  
350 was frequently reported as a facilitator to deprescribing, especially by patients and informal  
351 caregivers. Another facilitator for patients was dislike of CVMs. Necessity and benefit of  
352 CVMs were seen as barriers or facilitators similarly by patients and HCPs. However, patients  
353 and HCPs disagreed on the necessity and benefit of taking CVMs in case of frailty or robustness.  
354 The process required to deprescribe CVMs acted both as barrier and facilitator for patients and  
355 was more often reported as a barrier than as a facilitator by HCPs.



1  
2  
3 358 Barriers and facilitators to deprescribing CVMs did not differ significantly from those of  
4  
5 359 deprescribing general medications.<sup>(19, 43)</sup> A systematic review on patients' barriers and  
6  
7 360 facilitators to deprescribing displaying the same structure as ours, reported agreement with  
8  
9 361 appropriateness of cessation, fear, influences, dislike and process as barriers and/or facilitators  
10  
11 362 to deprescribing.<sup>(19)</sup> However, this review that included mainly nervous system medications,  
12  
13 363 did not report uncertainty and ambivalence towards deprescribing, suggesting that these two  
14  
15 364 factors were more specific to CVM deprescribing. Another systematic review on prescribers'  
16  
17 365 barriers and facilitators to deprescribing potentially inappropriate medications reported inertia  
18  
19 366 as importantly influencing deprescribing.<sup>(43)</sup> In our review, we also found that some HCPs  
20  
21 367 experienced deprescribing inertia, continuing CVMs even if they might be inappropriate, partly  
22  
23 368 because of fear of bad/unknown consequences of deprescribing.  
24  
25  
26  
27  
28  
29  
30

31 370 Fear of and uncertainty about deprescribing due to unknown/possible negative consequences  
32  
33 371 was indeed frequently mentioned as a barrier to deprescribing in the articles included in this  
34  
35 372 systematic review. Interestingly, while fear was as frequently reported as a barrier by  
36  
37 373 patients/informal caregivers than by HCPs, uncertainty was more frequently reported as a  
38  
39 374 barrier by HCPs, suggesting a different level of knowledge and feeling of responsibility  
40  
41 375 between HCPs and patients/informal caregivers. Such uncertainty was also reported in studies  
42  
43 376 focusing on deprescribing general medications in older, multimorbid adults, potentially because  
44  
45 377 of the complexity of interactions between diseases and the single-disease focused guidelines  
46  
47 378 that might not apply to patients with multimorbidity.<sup>(44-46)</sup> However, one of these studies stated  
48  
49 379 that balancing benefits and harms was particularly complicated for preventive medications.<sup>(44)</sup>  
50  
51 380 Tools to facilitate the deprescribing process and ensure safe CVM deprescribing could help to  
52  
53 381 do so, especially since HCPs in our review frequently reported the deprescribing process as a  
54  
55 382 barrier.  
56  
57  
58  
59  
60

383

1  
2  
3 384 While patient/informal caregiver and HCP points of view towards CVM deprescribing were  
4  
5 385 largely similar, we could highlight differences in the perceived benefit of CVMs in robust  
6  
7 386 versus frail patients. As shown in a study evaluating frail patient beliefs about prescribed  
8  
9 387 medications, most patients saw their medications as highly necessary.<sup>(47)</sup> However, over one-  
10  
11 388 third of patients included in this study stated that their medications were a mystery to them.<sup>(47)</sup>  
12  
13 389 This stresses the fact that patients might see a medication as necessary without being able to  
14  
15 390 understand its potential (lack of) benefit. HCPs, on the other hand, seemed to place importance  
16  
17 391 on their patients deriving benefits from their CVMs. Thus, they endorsed deprescribing in frail  
18  
19 392 patients due to a lack of time to benefit, but renounced deprescribing in robust patients. This  
20  
21 393 view is concordant with other studies on treating frail and/or robust patients.<sup>(9, 48)</sup> Other  
22  
23 394 differences between patients/informal caregivers and HCPs regarded ADE occurrence, that was  
24  
25 395 slightly more frequently cited as a facilitator in studies on patients/informal caregivers than on  
26  
27 396 HCPs, and dislike, which was a facilitator to deprescribing only mentioned by patients. These  
28  
29 397 divergent views emphasize the need for discussion between HCPs and patients/informal  
30  
31 398 caregivers about representations and beliefs, and how these might influence decision-making  
32  
33 399 about deprescribing. This is especially important for HCPs to consider, given how patients rely  
34  
35 400 on them for decision-making and might assume that they do not have to discuss their  
36  
37 401 preferences and beliefs as these are already clear for their HCPs.<sup>(49-51)</sup>  
38  
39  
40  
41  
42  
43  
44  
45  
46

## 47 403 **5. Strengths and limitations**

48  
49 404 This study has several strengths. First, data extraction, analysis and synthesis, as well as quality  
50  
51 405 assessment were conducted by two independent reviewers on all available data based on a  
52  
53 406 systematic review. Second, we included both quantitative and qualitative studies, providing  
54  
55 407 complementary information on barriers and facilitators to deprescribing.  
56  
57

58 408 However, this study also has limitations. First, in some studies, CVMs were part of the  
59  
60 409 evaluated medications but not the focus. However, this enabled inclusion of more studies and

1  
2  
3 410 thus exploration of more barriers and facilitators to deprescribing CVMs. Second, as this review  
4  
5 411 focused on CVMs in general, no conclusion can be made on individual CVMs. However,  
6  
7 412 barriers and facilitators did not appear to differ significantly between studies  
8  
9 413 assessing/exploring different CVMs, which leads to thinking that most barriers and facilitators  
10  
11 414 might be common across CVMs.  
12  
13  
14  
15 415

## 16 416 **6. Implications**

17  
18  
19 417 The identification of barriers and facilitators to deprescribing CVMs and the quantification of  
20  
21 418 the reporting frequency at the patient, informal caregiver and HCP levels, have several  
22  
23 419 implications and call for future actions to address the current lack of evidence regarding  
24  
25 420 potential benefits and risks of CVM deprescribing. First, differences in opinions between  
26  
27 421 patients and HCPs, such as CVM benefits and CVM dislike, stress the need for ground  
28  
29 422 discussions about beliefs and preferences about deprescribing of each stakeholder implicated  
30  
31 423 in the deprescribing decision. Second, the uncertainty about deprescribing CVMs that HCPs  
32  
33 424 frequently mentioned, HCP wish to account for patient preferences when approaching  
34  
35 425 deprescribing, and patients relying on HCPs for decision-making highlight the need to translate  
36  
37 426 a part of HCP responsibility in deprescribing to patients, so that decision-making can be shared  
38  
39 427 and jointly carried. To enable this, HCPs must be provided with tools that enable sharing the  
40  
41 428 risks and benefits of deprescribing with patients and ensure a safe deprescribing process.  
42  
43 429 Furthermore, HCPs should be trained on deprescribing processes and changes at the policy  
44  
45 430 making level should provide HCPs with sufficient time and adequate remuneration to approach  
46  
47 431 deprescribing with patients. Less time pressure would also enable patients to feel more  
48  
49 432 comfortable to address deprescribing with their HCPs.  
50  
51  
52  
53  
54  
55

56 433

57  
58 434

59  
60 435

## 436 7. Conclusion

437 In this systematic review, we provided an overview of barriers and facilitators to deprescribing  
438 CVMs, from the point of view of patients, informal caregivers and HCPs. The identification  
439 and quantification of barriers and facilitators most frequently cited by patients, informal  
440 caregivers and/or HCPs can help to develop future actions needed to improve evidence in CVM  
441 deprescribing and reduce the burden of medications for the patients.

## 443 8. Acknowledgments

444 The authors want to thank Judith Ellen Smith, Librarian at the University of Michigan (Ann  
445 Arbor, USA), who helped develop the search strategy, and Dr. Manuel Raphael Blum (Institute  
446 of Primary Health Care (BIHAM), University of Bern, Switzerland; Department of General  
447 Internal Medicine, Inselspital, Bern University Hospital, University of Bern, Switzerland), who  
448 critically revised the study protocol.

### 450 8.1. Financial and personal conflicts of interest:

451 The authors declare no conflict of interest.

### 453 8.2. Author contributions:

454 CEA, LB and NR designed the study protocol. CEA and LB extracted and analyzed the data.

455 CEA, LB and NR drafted the article. All authors gave final approval to submit the article.

### 457 8.3. Sponsors' role:

458 All authors were partly supported by the Swiss National Science Foundation Grant IICT  
459 33IC30-193052, and LB was supported by a grant from the College of General Internal  
460 Medicine. Both funding sources had no role in this study.

461

1  
2  
3 462 8.4. Data sharing statement:  
4

5 463 The coding of the articles is available by the authors on reasonable request.  
6  
7

8 464

9  
10 465 8.5. Funding:  
11

12 466 All authors were partly supported by the Swiss National Science Foundation Grant IICT  
13  
14 467 33IC30-193052 (PI Prof. Rodondi). LB and this study were supported by a grant from the  
15  
16  
17 468 College of General Internal Medicine (Fribourg, Switzerland) (No grant number).  
18

19 469

20  
21 470 8.6. Competing interests statement:  
22

23  
24 471 Nothing to disclose.  
25

26 472

27  
28 473  
29

30 474

31  
32 475  
33

34 476

35  
36 477  
37

38 478

39  
40 479  
41

42 480

43  
44 481  
45

46 482

47  
48 483  
49

50 484

51  
52 485  
53

54 486

55  
56 487  
57  
58  
59  
60

488 **9. References**

- 489 1. Krishnaswami A, Steinman MA, Goyal P, et al. Deprescribing in Older Adults With  
490 Cardiovascular Disease. *J Am Coll Cardiol* 2019;73(20):2584-95.
- 491 2. Scott IA, Hilmer SN, Reeve E, et al. Reducing inappropriate polypharmacy: the  
492 process of deprescribing. *JAMA Intern Med* 2015;175(5):827-34.
- 493 3. Informatics IifH. Global Medicines Use in 2020 2015 [Available from:  
494 <https://www.iqvia.com/-/media/iqvia/pdfs/institute-reports/global-medicines-use-in-2020>.  
495 Accessed July 12, 2021.
- 496 4. Goyal P, Requiño T, Siceloff B, et al. Patient-Reported Barriers and Facilitators to  
497 Deprescribing Cardiovascular Medications. *Drugs Aging* 2020;37(2):125-35.
- 498 5. Budnitz DS, Lovegrove MC, Shehab N, et al. Emergency hospitalizations for adverse  
499 drug events in older Americans. *N Engl J Med* 2011;365(21):2002-12.
- 500 6. Akbulut M, Urun Y. Onco-cardiology: Drug-drug interactions of antineoplastic and  
501 cardiovascular drugs. *Crit Rev Oncol Hematol* 2020;145:102822.
- 502 7. Rossello X, Pocock SJ, Julian DG. Long-Term Use of Cardiovascular Drugs:  
503 Challenges for Research and for Patient Care. *J Am Coll Cardiol* 2015;66(11):1273-85.
- 504 8. Ridker PM, Danielson E, Fonseca FA, et al. Rosuvastatin to prevent vascular events in  
505 men and women with elevated C-reactive protein. *N Engl J Med* 2008;359(21):2195-207.
- 506 9. Kutner JS, Blatchford PJ, Taylor DH, Jr., et al. Safety and benefit of discontinuing  
507 statin therapy in the setting of advanced, life-limiting illness: a randomized clinical trial.  
508 *JAMA Intern Med* 2015;175(5):691-700.
- 509 10. Moonen JE, Foster-Dingley JC, de Ruijter W, et al. Effect of discontinuation of  
510 antihypertensive medication on orthostatic hypotension in older persons with mild cognitive  
511 impairment: the DANTE Study Leiden. *Age Ageing* 2016;45(2):249-55.
- 512 11. Williamson JD, Pajewski NM, Auchus AP, et al. Effect of Intensive vs Standard  
513 Blood Pressure Control on Probable Dementia: A Randomized Clinical Trial. *JAMA*  
514 2019;321(6):553-61.
- 515 12. Linsky A, Meterko M, Bokhour BG, et al. Deprescribing in the context of multiple  
516 providers: understanding patient preferences. *Am J Manag Care* 2019;25(4):192-8.
- 517 13. Holmes HM, Todd A. The Role of Patient Preferences in Deprescribing. *Clin Geriatr*  
518 *Med* 2017;33(2):165-75.
- 519 14. McCartney M, Treadwell J, Maskrey N, et al. Making evidence based medicine work  
520 for individual patients. *BMJ* 2016;353:i2452.
- 521 15. Weir K, Nickel B, Naganathan V, et al. Decision-Making Preferences and  
522 Deprescribing: Perspectives of Older Adults and Companions About Their Medicines. *J*  
523 *Gerontol B Psychol Sci Soc Sci* 2018;73(7):e98-e107.
- 524 16. Woodward MC. Deprescribing: Achieving Better Health Outcomes for Older People  
525 Through Reducing Medications. *J Pharm Pract Res* 2003;33(4):323-8.
- 526 17. Vaismoradi M, Turunen H, Bondas T. Content analysis and thematic analysis:  
527 Implications for conducting a qualitative descriptive study. *Nurs Health Sci* 2013;15(3):398-  
528 405.
- 529 18. Burnard P, Gill P, Stewart K, et al. Analysing and presenting qualitative data. *Br Dent*  
530 *J* 2008;204(8):429-32.
- 531 19. Reeve E, To J, Hendrix I, et al. Patient barriers to and enablers of deprescribing: A  
532 systematic review. *Drugs Aging* 2013;30(10):793-807.
- 533 20. Hong QN, Gonzalez-Reyes A, Pluye P. Improving the usefulness of a tool for  
534 appraising the quality of qualitative, quantitative and mixed methods studies, the Mixed  
535 Methods Appraisal Tool (MMAT). *J Eval Clin Pract* 2018;24(3):459-67.
- 536 21. Hong QN, Pluye P, Fàbregues S, et al. Improving the content validity of the mixed  
537 methods appraisal tool: a modified e-Delphi study. *J Clin Epidemiol* 2019;111:49-59.e1.

- 1  
2  
3 538 22. Benson J, Britten N. What effects do patients feel from their antihypertensive tablets  
4 539 and how do they react to them? Qualitative analysis of interviews with patients. *Fam Pract*  
5 540 2006;23(1):80-7.  
6 541 23. Brinton EA. Understanding Patient Adherence and Concerns with Statins and  
7 542 Medication Discussions With Physicians (ACTION): A survey on the patient perspective of  
8 543 dialogue with healthcare providers regarding statin therapy. *Clin cardiol* 2018;41(6):710-20.  
9 544 24. Crutzen S, Baas G, Abou J, et al. Barriers and Enablers of Older Patients to  
10 545 Deprescribing of Cardiometabolic Medication: A Focus Group Study. *Front Pharmacol*  
11 546 2020;11:1268.  
12 547 25. Jansen J, McKinn S, Bonner C, et al. Shared decision-making about cardiovascular  
13 548 disease medication in older people: a qualitative study of patient experiences in general  
14 549 practice. *BMJ Open* 2019;9(3):e026342.  
15 550 26. Luymes CH, Boelhouwer NJ, Poortvliet RK, et al. Understanding deprescribing of  
16 551 preventive cardiovascular medication: a Q-methodology study in patients. *Patient Prefer*  
17 552 *Adherence* 2017;11:975-84.  
18 553 27. Pickering AN, Hamm ME, Dawdani A, et al. Older Patient and Caregiver Perspectives  
19 554 on Medication Value and Deprescribing: A Qualitative Study. *J Am Geriatr Soc*  
20 555 2020;68(4):746-53.  
21 556 28. Qi K, Reeve E, Hilmer SN, et al. Older peoples' attitudes regarding polypharmacy,  
22 557 statin use and willingness to have statins deprescribed in Australia. *Int J Clin Pharm*  
23 558 2015;37(5):949-57.  
24 559 29. Tjia J, Kutner JS, Ritchie CS, et al. Perceptions of Statin Discontinuation among  
25 560 Patients with Life-Limiting Illness. *J Palliat Med* 2017;20(10):1098-103.  
26 561 30. van Bussel E, Reurich L, Pols J, et al. Hypertension management: experiences, wishes  
27 562 and concerns among older people-a qualitative study. *BMJ Open* 2019;9(8):e030742.  
28 563 31. Ailabouni NJ, Nishtala PS, Mangin D, et al. Challenges and Enablers of  
29 564 Deprescribing: A General Practitioner Perspective. *PLoS One* 2016;11(4):e0151066.  
30 565 32. Ailabouni NJ, Nishtala PS, Mangin D, et al. General practitioners' insight into  
31 566 deprescribing for the multimorbid older individual: a qualitative study. *Int J Clin Pract*  
32 567 2016;70(3):261-76.  
33 568 33. Anderson K, Foster M, Freeman C, et al. Negotiating "Unmeasurable Harm and  
34 569 Benefit": Perspectives of General Practitioners and Consultant Pharmacists on Deprescribing  
35 570 in the Primary Care Setting. *Qual Health Res* 2017;27(13):1936-47.  
36 571 34. Geijteman ECT, Huisman BAA, Dees MK, et al. Medication Discontinuation at the  
37 572 End of Life: A Questionnaire Study on Physicians' Experiences and Opinions. *J Palliat Med*  
38 573 2018;21(8):1166-70.  
39 574 35. Goyal P, Anderson TS, Bernacki GM, et al. Physician Perspectives on Deprescribing  
40 575 Cardiovascular Medications for Older Adults. *J Am Geriatr Soc* 2020;68(1):78-86.  
41 576 36. Green AR, Lee P, Reeve E, et al. Clinicians' Perspectives on Barriers and Enablers of  
42 577 Optimal Prescribing in Patients with Dementia and Coexisting Conditions. *J Am Board Fam*  
43 578 *Med* 2019;32(3):383-91.  
44 579 37. Jansen J, McKinn S, Bonner C, et al. General Practitioners' Decision Making about  
45 580 Primary Prevention of Cardiovascular Disease in Older Adults: A Qualitative Study. *PLoS*  
46 581 *One* 2017;12(1):e0170228.  
47 582 38. Thompson W, Le JV, Haastrup P, et al. Exploring how GPs discuss statin  
48 583 deprescribing with older people: A qualitative study. *BJGP Open* 2020;4(1).  
49 584 39. van Middelaar T, Ivens SD, van Peet PG, et al. Prescribing and deprescribing  
50 585 antihypertensive medication in older people by Dutch general practitioners: a qualitative  
51 586 study. *BMJ Open* 2018;8(4):e020871.  
52  
53  
54  
55  
56  
57  
58  
59  
60

- 1  
2  
3 587 40. van der Ploeg MA, Streit S, Achterberg WP, et al. Patient Characteristics and General  
4 588 Practitioners' Advice to Stop Statins in Oldest-Old Patients: a Survey Study Across 30  
5 589 Countries. *J Gen Intern Med* 2019;34(9):1751-7.  
6 590 41. Luymes CH, van der Kleij RMJJ, Poortvliet RKE, et al. Deprescribing Potentially  
7 591 Inappropriate Preventive Cardiovascular Medication: Barriers and Enablers for Patients and  
8 592 General Practitioners. *Ann Pharmacother* 2016;50(6):446-54.  
9 593 42. Todd A, Holmes H, Pearson S, et al. 'I don't think I'd be frightened if the statins went':  
10 594 A phenomenological qualitative study exploring medicines use in palliative care patients,  
11 595 carers and healthcare professionals. *BMC Palliat Care* 2016;15(1).  
12 596 43. Anderson K, Stowasser D, Freeman C, et al. Prescriber barriers and enablers to  
13 597 minimising potentially inappropriate medications in adults: a systematic review and thematic  
14 598 synthesis. *BMJ Open* 2014;4(12):e006544.  
15 599 44. Bokhof B, Junius-Walker U. Reducing Polypharmacy from the Perspectives of  
16 600 General Practitioners and Older Patients: A Synthesis of Qualitative Studies. *Drugs Aging*  
17 601 2016;33(4):249-66.  
18 602 45. Rieckert A, Sommerauer C, Krumeich A, et al. Reduction of inappropriate medication  
19 603 in older populations by electronic decision support (the PRIMA-eDS study): a qualitative  
20 604 study of practical implementation in primary care. *BMC Fam Pract* 2018;19(1):110.  
21 605 46. Schuling J, Gebben H, Veehof LJ, et al. Deprescribing medication in very elderly  
22 606 patients with multimorbidity: the view of Dutch GPs. A qualitative study. *BMC Fam Pract*  
23 607 2012;13:56.  
24 608 47. Modig S, Kristensson J, Ekwall AK, et al. Frail elderly patients in primary care--their  
25 609 medication knowledge and beliefs about prescribed medicines. *Eur J Clin Pharmacol*  
26 610 2009;65(2):151-5.  
27 611 48. Benetos A, Rossignol P, Cherubini A, et al. Polypharmacy in the Aging Patient:  
28 612 Management of Hypertension in Octogenarians. *JAMA* 2015;314(2):170-80.  
29 613 49. Morecroft C, Cantrill J, Tully MP. Patients' evaluation of the appropriateness of their  
30 614 hypertension management-a qualitative study. *Res Social Adm Pharm* 2006;2(2):186-211.  
31 615 50. Morecroft C, Cantrill J, Tully MP. Individual patient's preferences for hypertension  
32 616 management: a Q-methodological approach. *Patient Educ Couns* 2006;61(3):354-62.  
33 617 51. Bynum JP, Barre L, Reed C, et al. Participation of very old adults in health care  
34 618 decisions. *Med Decis Making* 2014;34(2):216-30.

619

620

621

622

623

624

625

626

627



1  
2  
3 628 **FIGURE LEGEND:**  
4

5 629 **Figure 1: Study selection results**  
6

7  
8 630 **Abbreviations:** CVM: cardiovascular medication; HCP: healthcare providers  
9  
10  
11  
12  
13  
14  
15  
16  
17  
18  
19  
20  
21  
22  
23  
24  
25  
26  
27  
28  
29  
30  
31  
32  
33  
34  
35  
36  
37  
38  
39  
40  
41  
42  
43  
44  
45  
46  
47  
48  
49  
50  
51  
52  
53  
54  
55  
56  
57  
58  
59  
60

For peer review only

## 10. Supplemental material

The detailed search strategy, the detailed study characteristics, and the study quality appraisal are presented in the supplemental material section.

For peer review only

**Figure 1: Study selection results**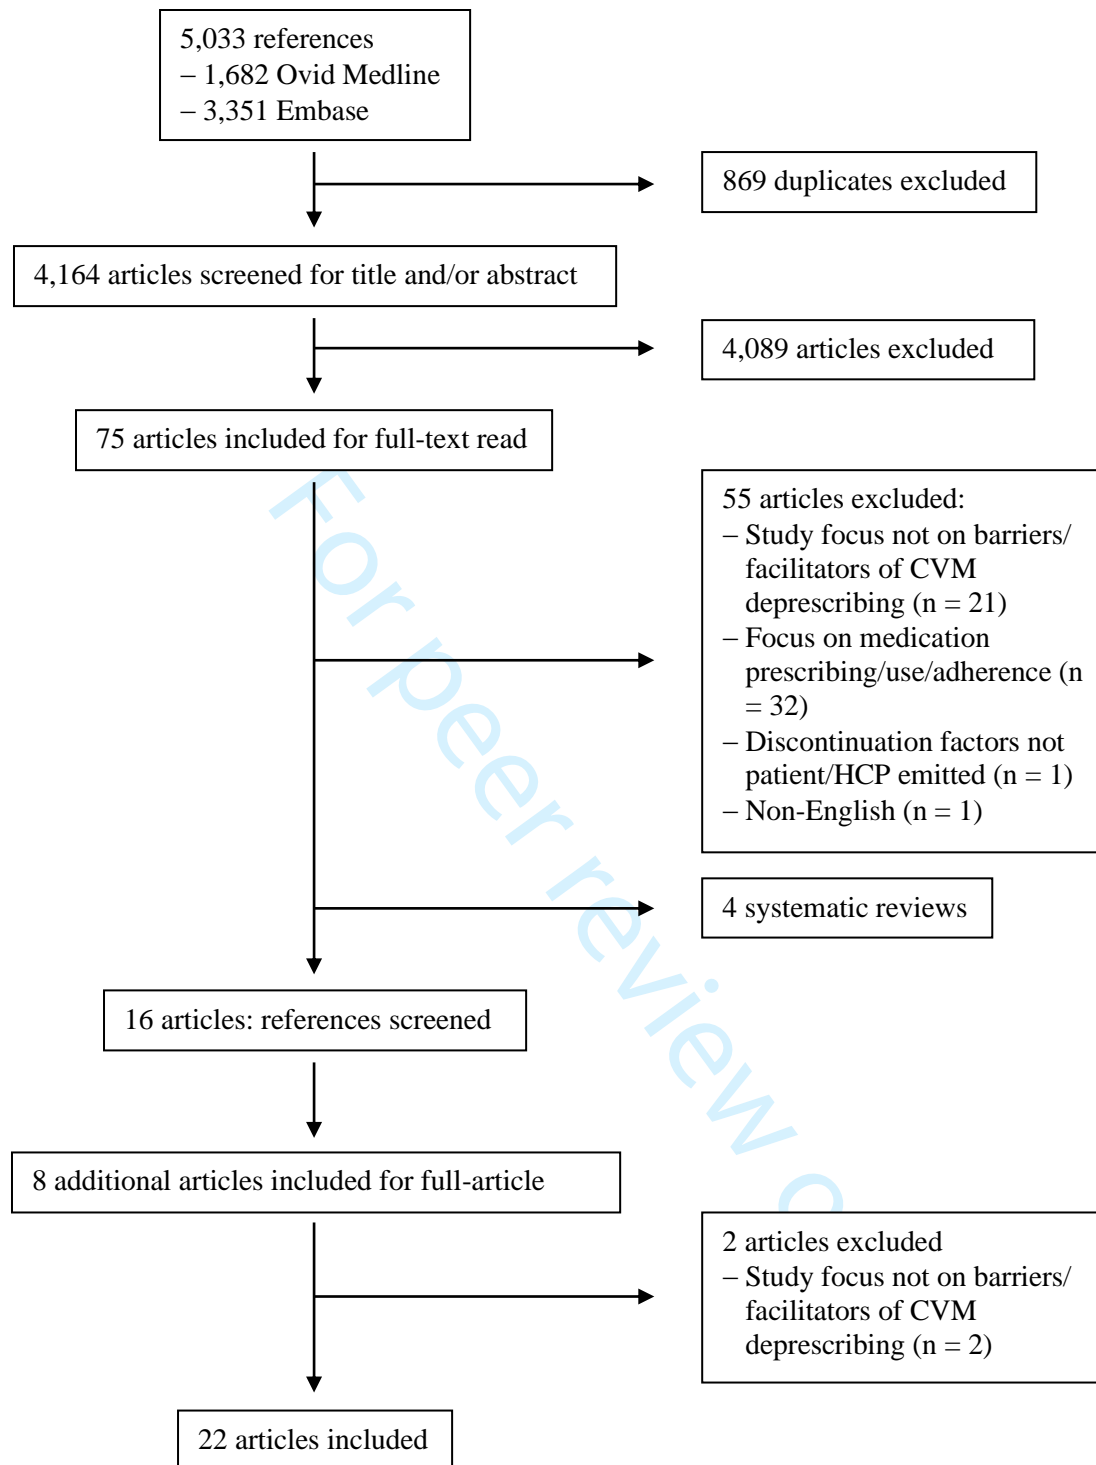

**Legend:** CVM: cardiovascular medication; HCP: healthcare providers

1 **Supplemental Material S1: Search strategy barriers and facilitators to deprescribing cardiovascular**  
 2 **medications**

3  
 4 **COVID/MEDLINE 2021.11.15: 1,682 results**

5  
 6 Concept 1: cardiovascular medications

- 7 1. exp cardiovascular agents/  
 8 2. exp Hydroxymethylglutaryl-CoA Reductase Inhibitors/  
 9 3. ("hmg coa reductase inhibitors" or "hmg-coa reductase inhibitors" or "hydroxymethylglutaryl coa reductase  
 10 inhibitors" or "hydroxymethylglutaryl-coa inhibitors" or "hydroxymethylglutaryl-coa reductase inhibitors" or  
 11 "hydroxymethylglutaryl-coenzyme a inhibitors" or "inhibitors, hmg coa reductase" or "inhibitors, hmg-coa  
 12 reductase" or "inhibitors, hydroxymethylglutaryl coa" or "inhibitors, hydroxymethylglutaryl coenzyme a" or  
 13 "inhibitors, hydroxymethylglutaryl-coa" or "inhibitors, hydroxymethylglutaryl-coa reductase" or "inhibitors,  
 14 hydroxymethylglutaryl-coenzyme a" or "reductase inhibitors, hmg-coa" or "reductase inhibitors,  
 15 hydroxymethylglutaryl-coa" or "hmg-coa statins" or statins or "statins, hmg coa" or "statins, hmg-coa" or  
 16 "Cardiovascular medic\*" or "cardiovascular drug\*" or "cardiovascular preparation\*" or "cardiovascular medic\*" OR  
 17 "cardiovascular prescri\*" or "cardiovascular therapeutic\*" or "cardiovascular treat\*" or "cardiometabolic  
 18 medic\*" or "cardiometabolic drug\*" or "cardiometabolic agent\*" or "cardiometabolic preparation\*" or  
 19 "cardiometabolic prescri\*" or "cardiometabolic therapeutic\*" or "cardiometabolic treat\*" or "lipid-lowering  
 20 treat\*" or "lipid-lowering medic\*" or "lipid-lowering drug\*" or "lipid-lowering agent\*" or "lipid-lowering  
 21 preparation\*" or "lipid-lowering prescri\*" or "lipid-lowering therapeutic\*").ab,ti.  
 22 4. "cardiovascular disease".ab,ti.  
 23 5. \*cardiovascular diseases/  
 24 6. prevention.ab,ti.  
 25 7. \*primary prevention/  
 26 8. \*secondary prevention/  
 27 9. 4 or 5  
 28 10. 6 or 7 or 8  
 29 11. 9 and 10

30 Concept 2: prescribing / deprescribing

- 31 12. exp Deprescriptions/  
 32 13. exp Withholding Treatment/  
 33 14. exp Potentially Inappropriate Medication List/  
 34 15. exp Inappropriate Prescribing/  
 35 16. (reduce or reducing or reduction or reduced or withdraw\* or withhold\* or stop or stopped or stopping or  
 36 elimin\* or tapering or taper or cease or ceasing or ceased or cessation\* or de-intensif\* or deintensif\* or  
 37 deprescribing or deprescri\* or "de-prescribing" or "de-prescrib\*" or "de-implementation\*" or "de-implement\*" or  
 38 deimplement\* or discontinue\* or discontinuation\* or curb or curbing or curbed).ab,ti.

39 Concept 3: barriers and facilitators

- 40 17. \*patient acceptance of health care/  
 41 18. \*patient preference/  
 42 19. \*attitude to health/  
 43 20. \*physician-patient relations/  
 44 21. (barriers or barrier or issues or issue or problems or problem or hinder or hindered or hinders or facilitate or  
 45 facilitates or facilitated or facilitator or facilitators or ease or easy or easier or difficult or difficulty or  
 46 willingness or belief or believe\* or preference\* or willing or dialog\* or conversation\* or decision or decide\* or  
 47 deciding or motivation or conversation or acceptance or acceptability).ti.  
 48 22. (perceptions or perception or behaviors or behavior or behaviour or behaviours or attitudes or attitude or  
 49 input or inputs or experience or experiences or value or values or perspective\* or expectation\* or choice or  
 50 choices or empower\* or choose\* or choosing or acceptance or acceptability or knowledge\* or preference\* or  
 51 motivation\* or intention\* or involv\* or engag\* or consult\* or interact\* or involv\* or satisfaction or satisfied or  
 52 discuss\* or discussion\*).ti.  
 53 23. (GP\* or pharmacist\* or physician\* or provider\* or patient\* or "general practitioner\*" or patient\* or adult\* or  
 54 relative\* or caregiver\*).ti.  
 55 24. 22 and 23  
 56 25. 1 or 2 or 3 or 11  
 57 26. 12 or 13 or 14 or 15 or 16  
 58 27. 17 or 18 or 19 or 20 or 21 or 24  
 59 28. 25 and 26 and 27  
 60 29. limit 28 to (English language and yr="2003-Current")  
 30. (child or kid or kids or childhood or children or pediatric or paediatric or pediatrics or paediatrics or mouse  
 or mice or animals or animal).ab,ti.  
 31. 29 not 30

EMBASE 2021.11.15: 3,351 results

Concept 1: cardiovascular medications

1. 'cardiovascular agent'/exp
2. 'hydroxymethylglutaryl coenzyme A reductase inhibitor'/exp
3. ("hmg coa reductase inhibitors" or "hmg-coa reductase inhibitors" or "hydroxymethylglutaryl coa reductase inhibitors" or "hydroxymethylglutaryl-coa inhibitors" or "hydroxymethylglutaryl-coa reductase inhibitors" or "hydroxymethylglutaryl-coenzyme a inhibitors" or "inhibitors, hmg coa reductase" or "inhibitors, hmg-coa reductase" or "inhibitors, hydroxymethylglutaryl coa" or "inhibitors, hydroxymethylglutaryl coenzyme a" or "inhibitors, hydroxymethylglutaryl-coa" or "inhibitors, hydroxymethylglutaryl-coa reductase" or "inhibitors, hydroxymethylglutaryl-coenzyme a" or "reductase inhibitors, hmg-coa" or "reductase inhibitors, hydroxymethylglutaryl-coa" or "hmg-coa statins" or statins or "statins, hmg coa" or "statins, hmg-coa" or "Cardiovascular medic\*" or "cardiovascular drug\*" or "cardiovascular preparation\*" or "cardiovascular medic\*" OR "cardiovascular prescri\*" or "cardiovascular therapeutic\*" or "cardiovascular treat\*" or "cardiomatabolic medic\*" or "cardiomatabolic drug\*" or "cardiomatabolic agent\*" or "cardiomatabolic preparation\*" or "cardiomatabolic prescri\*" or "cardiomatabolic therapeutic\*" or "cardiomatabolic treat\*" or "lipid-lowering treat\*" or "lipid-lowering medic\*" or "lipid-lowering drug\*" or "lipid-lowering agent\*" or "lipid-lowering preparation\*" or "lipid-lowering prescri\*" or "lipid-lowering therapeutic\*"):ab,ti
4. "cardiovascular disease":ab,ti
5. 'cardiovascular diseases'/mj
6. prevention:ab,ti
7. 'primary prevention'/mj
8. 'secondary prevention'/mj
9. 4 or 5
10. 6 or 7 or 8
11. 9 and 10

Concept 2: prescribing / deprescribing

12. 'deprescription'/mj
13. 'treatment withdrawal'/mj
14. 'potentially inappropriate medication'/mj
15. 'inappropriate prescribing'/mj
16. (reduce or reducing or reduction or reduced or withdraw\* or withhold\* or stop or stopped or stopping or elimin\* or tapering or taper or cease or ceasing or ceased or cessation\* or de-intensif\* or deintensif\* or deprescribing or deprescri\* or "de-prescribing" or "de-prescrib\*" or "de-implementation\*" or "de-implement\*" or deimplement\* or discontinue\* or discontinuation\* or curb or curbing or curbed):ab,ti

Concept 3: barriers and facilitators

17. 'patient attitude'/mj
18. 'patient preference'/mj
19. 'attitude to health'/mj
20. 'doctor patient relationship'/mj
21. (barriers or barrier or issues or problems or problem or hinder or hindered or hinders or facilitate or facilitates or facilitated or facilitator or facilitators or ease or easy or easier or difficult or difficulty or willingness or belief or believe\* or preference\* or willing or dialog\* or conversation\* or decision or decide\* or deciding or motivation or conversation or acceptance or acceptability):ti
22. (perceptions or perception or behaviors or behavior or behaviour or behaviours or attitudes or attitude or input or inputs or experience or experiences or value or values or perspective\* or expectation\* or choice or choices or empower\* or choose\* or choosing or acceptance or acceptability or knowledge\* or preference\* or motivation\* or intention\* or involv\* or engag\* or consult\* or interact\* or involv\* or satisfaction or satisfied or discuss\* or discussion\*):ti
23. (GP\* or pharmacist\* or physician\* or provider\* or patient\* or "general practitioner\*" or patient\* or adult\* or relative\* or caregiver\*):ti
24. #22 AND #23
25. #1 OR #2 OR #3 OR #11
26. #12 OR #13 OR #14 OR #15 OR #16
27. #17 OR #18 OR #19 OR #20 OR #21 OR #24
28. #25 AND #26 AND #27
29. (child or kid or kids or childhood or children or pediatric or paediatric or pediatrics or paediatrics or mouse or mice or animals or animal):ti,ab
30. #25 AND #26 AND #27 NOT #29 AND ([article]/lim OR [review]/lim) AND [english]/lim AND ([embase]/lim OR [embase classic]/lim OR [pubmed-not-medicine]/lim) AND [2003-2020]/py

## Supplemental Material S2: study characteristics

| First author                | Setting                                                                                  | Design                   | Data collection mean         | N population                 | Age                                                                                     | No of medication taken                                                                                               | Studied CVM(s)                                                                     | Prevention type     | Life-limiting disease |
|-----------------------------|------------------------------------------------------------------------------------------|--------------------------|------------------------------|------------------------------|-----------------------------------------------------------------------------------------|----------------------------------------------------------------------------------------------------------------------|------------------------------------------------------------------------------------|---------------------|-----------------------|
| Benson, 2005 (UK)           | Primary care                                                                             | Qualitative              | Interviews                   | 38 patients                  | 18% <50 years<br>16% 50-59 years<br>29% 60-69 years<br>24% 70-79 years<br>13% ≥80 years | Antihypertensives:<br>50%: 1; 39%: 2; 11%: ≥3<br>Non-antihypertensives:<br>34%: 0; 18%: 2, 13%: 3;<br>11%: 4; 8%: ≥5 | Antihypertensives                                                                  | Unknown             | No                    |
| Brinton, 2018 (USA)         | Online panels                                                                            | Quantitative descriptive | Survey                       | 5014 patients                | Mean age: 64                                                                            | 99% of current statin users taking a mean of 7.7 meds                                                                | Statin                                                                             | Primary & secondary | No                    |
| Crutzen, 2020 (Netherlands) | Primary care                                                                             | Qualitative              | FGs                          | 17 patients<br>1 caregiver   | Median age:<br>FG1: 78<br>FG2: 77.5                                                     | FG1: 6: 5-10; 2: >10<br>FG2: 4: 5-10; 5: >10                                                                         | Cardiometabolic medication                                                         | Primary & secondary | No                    |
| Goyal, 2020 (USA)           | Quaternary care                                                                          | Qualitative              | Interviews                   | 10 patients                  | Median age: 80                                                                          | Median of 12                                                                                                         | β-blockers                                                                         | Primary & secondary | No                    |
| Jansen, 2019 (Australia)    | Primary care                                                                             | Qualitative              | Interviews                   | 30 patients                  | 20: 75-79 years<br>4: 80-84 years<br>5: 85-89 years<br>1: ≥90 years                     | Unknown                                                                                                              | Preventive CV medication                                                           | Primary & secondary | No                    |
| Luymes, 2017 (Netherlands)  | Primary care                                                                             | Mixed methods            | Q-sorts<br>Group discussions | 33 patients                  | Mean age:<br>- Q-Sort: 57.1<br>- Discussion: 57.7                                       | Unknown                                                                                                              | LLTs<br>Antihypertensives                                                          | Primary             | No                    |
| Pickering, 2020 (USA)       | Claude D. Pepper Older Americans Independence Center Research Registry; Pitt+Me registry | Qualitative              | FGs                          | 16 patients<br>17 caregivers | Patients ≥ 65<br>Caregivers 22-69                                                       | ≥ 5 prescribed                                                                                                       | Unspecified (identified: antihypertensives, statins, antiplatelets, antidiabetics) | Primary & secondary | No                    |
| Qi, 2015 (Australia)        | Tertiary care                                                                            | Quantitative descriptive | Survey                       | 180 patients                 | Median age: 78                                                                          | Median of 8                                                                                                          | Regular medications<br>Statins                                                     | Primary & secondary | No                    |
| Tija, 2017 (USA)            | PCRC member sites                                                                        | Quantitative descriptive | Survey                       | 297 patients                 | Mean age: 71.8                                                                          | Mean of 11.5                                                                                                         | Statin                                                                             | Primary & secondary | Yes                   |

1  
2

|    |                                      |                                   |                             |                                     |                                                                                                                                            |                                                                             |                                                   |                                       |                                                                                           |                            |                                       |
|----|--------------------------------------|-----------------------------------|-----------------------------|-------------------------------------|--------------------------------------------------------------------------------------------------------------------------------------------|-----------------------------------------------------------------------------|---------------------------------------------------|---------------------------------------|-------------------------------------------------------------------------------------------|----------------------------|---------------------------------------|
| 3  | Van Bussel,<br>2019<br>(Netherlands) | Primary care                      | Qualitative                 | Interviews                          | 15 patients                                                                                                                                | Mean age: 81                                                                | Median of 4 with median<br>of 2 antihypertensives | Antihypertensives                     | Primary                                                                                   | No                         |                                       |
| 6  | <b>First author</b>                  | <b>Setting</b>                    | <b>Design</b>               | <b>Data<br/>collection<br/>mean</b> | <b>N population</b>                                                                                                                        | <b>Years of<br/>experiences</b>                                             | <b>HCPs' patients' characteristics</b>            |                                       |                                                                                           |                            |                                       |
| 9  |                                      |                                   |                             |                                     |                                                                                                                                            |                                                                             | <b>Age</b>                                        | <b>No of<br/>medication<br/>taken</b> | <b>Studied CVM(s)</b>                                                                     | <b>Prevention<br/>type</b> | <b>Life-<br/>limiting<br/>disease</b> |
| 12 | Ailabouni,<br>2016 (New<br>Zealand)  | Primary care                      | Qualitative                 | Interviews                          | 10 GPs                                                                                                                                     | Unknown                                                                     | 83                                                | 17                                    | Antiplatelets, statin,<br>antidiabetics,<br>diuretics, $\beta$ -blocker,<br>ACE inhibitor | Secondary                  | No                                    |
| 16 | Ailabouni,<br>2016 (New<br>Zealand)  | Primary care                      | Qualitative                 | Interviews                          | 10 GPs                                                                                                                                     | 2-32                                                                        | Unspecified<br>(older<br>patients)                | Unknown                               | Unspecified<br>(statin and aspirin<br>mentioned)                                          | Unknown                    | No                                    |
| 16 | Anderson,<br>2017<br>(Australia)     | Primary care                      | Qualitative                 | FGs                                 | 32 GPs<br>15 CPs                                                                                                                           | GPs: median of<br>18<br>CP: median of 9                                     | Unknown                                           | Unknown                               | Unspecified<br>(statin mentioned)                                                         | Unknown                    | No                                    |
| 22 | Geijteman,<br>2018<br>(Netherlands)  | Primary &<br>secondary<br>care    | Quantitative<br>descriptive | Survey                              | 174 GPs<br>147 clinical<br>specialists<br>(medical<br>oncologists,<br>geriatricians,<br>cardiologists,<br>pulmonologists,<br>neurologists) | 203: 0-9 years<br>56: 10-19 years<br>40: 20-29 years<br>18: $\geq$ 30 years | 88                                                | 10                                    | ACE inhibitor, statin,<br>anticoagulant,<br>diuretic, antidiabetic                        | Secondary                  | Yes                                   |
| 30 | Goyal, 2020<br>(USA)                 | Secondary<br>and tertiary<br>care | Quantitative<br>descriptive | Survey                              | 184 geriatricians<br>182 general<br>internists<br>87 cardiologists                                                                         | 86: 1-10 years<br>99: 11-20 years<br>138: 21-30 years<br>130: > 30 years    | 79                                                | Unspecified<br>(several)              | 4 CV medications                                                                          | Unknown                    | Yes and<br>no                         |

43  
44  
45  
46

1  
2  
3  
4  
5  
6  
7  
8  
9  
10  
11  
12  
13  
14  
15  
16  
17  
18  
19  
20  
21  
22  
23  
24  
25  
26  
27  
28  
29  
30  
31  
32  
33  
34  
35  
36  
37  
38  
39  
40  
41  
42  
43  
44  
45  
46

|                                    |                          |                          |                                        |                                                                                                                          |                                                                     |                                        |                                |                                                                     |                        |                              |
|------------------------------------|--------------------------|--------------------------|----------------------------------------|--------------------------------------------------------------------------------------------------------------------------|---------------------------------------------------------------------|----------------------------------------|--------------------------------|---------------------------------------------------------------------|------------------------|------------------------------|
| Green, 2019 (USA)                  | Primary & secondary care | Qualitative              | Interviews                             | 19 physicians<br>2 nurse practitioners (family, internal & geriatric medicine, urogynecology, endocrinology, cardiology) | Mean of 14                                                          | Unspecified (older patients)           | Unknown                        | Unspecified (oral anticoagulants, antidiabetics, statins mentioned) | Unknown                | Yes                          |
| Jansen, 2017 (Australia)           | Primary care             | Qualitative              | Interviews                             | 25 GPs                                                                                                                   | 2: < 10 years<br>4: 10-19 years<br>7: 20-29 years<br>12: ≥ 30 years | ≥75                                    | Unknown                        | Preventive CV medication                                            | Primary                | No                           |
| Thompson, 2020 (Denmark)           | Primary care             | Qualitative              | Interviews                             | 11 GPs                                                                                                                   | Mean of 9                                                           | ≥ 80                                   | Unknown                        | Statin                                                              | Unknown                | Yes and no                   |
| Van Middelaar, 2020 (Netherlands)  | Primary care             | Qualitative              | Interviews                             | 15 GPs                                                                                                                   | 4: 0-5 years<br>3: 5-10 years<br>3: 10-15 years<br>5: > 15 years    | Unspecified (older patients)           | Unknown                        | Antihypertensives                                                   | Unknown                | Yes and no                   |
| Van der Ploeg, 2018 (30 countries) | Primary care             | Quantitative descriptive | Survey                                 | 2250 GPs                                                                                                                 | 358: < 5 years<br>1024: 5-20 years<br>865: > 20 years               | ≥ 80                                   | Unknown                        | Statin                                                              | Primary and secondary  | Yes and no                   |
| <b>First author</b>                | <b>Setting</b>           | <b>Design</b>            | <b>Data collection mean</b>            | <b>N population</b>                                                                                                      | <b>Years of experiences</b>                                         | <b>HCPs' patients' characteristics</b> |                                |                                                                     |                        |                              |
|                                    |                          |                          |                                        |                                                                                                                          |                                                                     | <b>Age</b>                             | <b>No of medication taken</b>  | <b>Studied CVM(s)</b>                                               | <b>Prevention type</b> | <b>Life-limiting disease</b> |
| Luymes, 2016 (Netherlands)         | Primary care             | Qualitative              | Audiotaped deprescribing consultations | 10 GPs<br>49 patients                                                                                                    | Unknown                                                             | Median of 55.4                         | 27: < 2 kinds<br>22: ≥ 2 kinds | Antihypertensives, LLTs                                             | Primary                | No                           |



1  
2

|   |                    |                                                                 |             |            |                                                                                                              |         |                                                        |         |                                                                                        |         |     |
|---|--------------------|-----------------------------------------------------------------|-------------|------------|--------------------------------------------------------------------------------------------------------------|---------|--------------------------------------------------------|---------|----------------------------------------------------------------------------------------|---------|-----|
| 3 | Todd, 2016<br>(UK) | Specialist<br>palliative care<br>unit at a<br>daycare<br>centre | Qualitative | Interviews | 12 patients<br>12 informal<br>caregivers<br>3 palliative<br>consultants<br>3 nurse<br>practitioners<br>6 GPs | Unknown | 1: < 50<br>3: 51-60<br>3: 61-70<br>3: 71-79<br>2: ≥ 80 | Unknown | Unspecified<br>(preventive<br>medications,<br>including statins,<br>antihypertensives) | Unknown | Yes |
|---|--------------------|-----------------------------------------------------------------|-------------|------------|--------------------------------------------------------------------------------------------------------------|---------|--------------------------------------------------------|---------|----------------------------------------------------------------------------------------|---------|-----|

11  
12  
13

**Legend:** CPs: community pharmacists; CV: cardiovascular; CVM: cardiovascular medications; FGs: focus groups; GPs: general practitioners; HCPs: healthcare providers; LLTs: lipid-lowering therapies; PCRC: Palliative Care Research Cooperation Group

14  
15  
16  
17  
18  
19  
20  
21  
22  
23  
24  
25  
26  
27  
28  
29  
30  
31  
32  
33  
34  
35  
36  
37  
38  
39  
40  
41  
42  
43  
44  
45  
46

For Peer review only

## Supplemental Material S3: Details of study quality appraisal

|                          | Authors          | Is the qualitative approach appropriate to answer the research question? | Are the qualitative data collection methods adequate to address the research question? | Are the findings adequately derived from the data? | Is the interpretation of results sufficiently substantiated by data? | Is there coherence between qualitative data sources, collection, analysis and interpretation? |
|--------------------------|------------------|--------------------------------------------------------------------------|----------------------------------------------------------------------------------------|----------------------------------------------------|----------------------------------------------------------------------|-----------------------------------------------------------------------------------------------|
| QUALITATIVE              | Ailabouni, 2016  | Can't tell                                                               | Yes                                                                                    | Yes                                                | Can't tell                                                           | Yes                                                                                           |
|                          | Ailabouni, 2016  | Yes                                                                      | Yes                                                                                    | Yes                                                | Yes                                                                  | Yes                                                                                           |
|                          | Anderson, 2017   | Yes                                                                      | Yes                                                                                    | Yes                                                | Yes                                                                  | Yes                                                                                           |
|                          | Benson, 2005     | Yes                                                                      | Yes                                                                                    | Yes                                                | Yes                                                                  | Yes                                                                                           |
|                          | Crutzen, 2020    | Yes                                                                      | Yes                                                                                    | Yes                                                | Yes                                                                  | Yes                                                                                           |
|                          | Goyal, 2020      | Yes                                                                      | Yes                                                                                    | Yes                                                | Yes                                                                  | Yes                                                                                           |
|                          | Green, 2019      | Yes                                                                      | Yes                                                                                    | Yes                                                | Yes                                                                  | Yes                                                                                           |
|                          | Jansen, 2017     | Yes                                                                      | Yes                                                                                    | Yes                                                | Yes                                                                  | Yes                                                                                           |
|                          | Jansen, 2019     | Yes                                                                      | Yes                                                                                    | Yes                                                | Yes                                                                  | Yes                                                                                           |
|                          | Luymes, 2016     | Yes                                                                      | Yes                                                                                    | Yes                                                | Yes                                                                  | Yes                                                                                           |
|                          | Pickering, 2020  | Yes                                                                      | Yes                                                                                    | Yes                                                | Yes                                                                  | Yes                                                                                           |
|                          | Thompson 2019    | Yes                                                                      | Yes                                                                                    | Yes                                                | Yes                                                                  | Yes                                                                                           |
|                          | Todd, 2016       | Yes                                                                      | Yes                                                                                    | Yes                                                | Yes                                                                  | Yes                                                                                           |
|                          | Van Bussel, 2019 | Yes                                                                      | Yes                                                                                    | Yes                                                | Yes                                                                  | Yes                                                                                           |
| Van Middelaar, 2018      | Yes              | Yes                                                                      | Yes                                                                                    | Yes                                                | Yes                                                                  |                                                                                               |
| QUANTITATIVE DESCRIPTIVE |                  | Is the sampling strategy relevant to address the research question?      | Is the sample representative of the target population?                                 | Are the measurements appropriate?                  | Is the risk of nonresponse bias low?                                 | Is the statistical analysis appropriate to answer the research question?                      |
|                          | Brinton, 2018    | Yes                                                                      | Yes                                                                                    | Can't tell                                         | No                                                                   | Can't tell                                                                                    |
|                          | Geijteman, 2018  | Yes                                                                      | No                                                                                     | Yes                                                | No                                                                   | Yes                                                                                           |
|                          | Goyal, 2020      | Yes                                                                      | No                                                                                     | Yes                                                | No                                                                   | Yes                                                                                           |
|                          | Qi, 2015         | Yes                                                                      | No                                                                                     | Yes                                                | Yes                                                                  | Yes                                                                                           |
|                          | Tijja, 2017      | Yes                                                                      | No                                                                                     | Yes                                                | Yes                                                                  | Yes                                                                                           |
| Van der Ploeg, 2019      | Yes              | No                                                                       | Yes                                                                                    | No                                                 | Yes                                                                  |                                                                                               |

| MIXED METHODS |              | <b>Is there an adequate rationale for using a mixed methods design to address the research question?</b> | <b>Are the different components of the study effectively integrated to answer the research question?</b> | <b>Are the outputs of the integration of qualitative and quantitative components adequately interpreted?</b> | <b>Are divergences and inconsistencies between quantitative and qualitative results adequately addressed?</b> | <b>Do the different components of the study adhere to the quality criteria of each tradition of the methods involved?</b> |
|---------------|--------------|----------------------------------------------------------------------------------------------------------|----------------------------------------------------------------------------------------------------------|--------------------------------------------------------------------------------------------------------------|---------------------------------------------------------------------------------------------------------------|---------------------------------------------------------------------------------------------------------------------------|
|               | Luymes, 2017 | Yes                                                                                                      | Yes                                                                                                      | Yes                                                                                                          | No                                                                                                            | Yes                                                                                                                       |

For peer review only

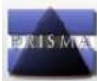

# PRISMA 2020 Checklist

| Section and Topic             | Item # | Checklist item                                                                                                                                                                                                                                                                                       | Location where item is reported |
|-------------------------------|--------|------------------------------------------------------------------------------------------------------------------------------------------------------------------------------------------------------------------------------------------------------------------------------------------------------|---------------------------------|
| <b>TITLE</b>                  |        |                                                                                                                                                                                                                                                                                                      |                                 |
| Title                         | 1      | Identify the report as a systematic review.                                                                                                                                                                                                                                                          | p.1                             |
| <b>ABSTRACT</b>               |        |                                                                                                                                                                                                                                                                                                      |                                 |
| Abstract                      | 2      | See the PRISMA 2020 for Abstracts checklist.                                                                                                                                                                                                                                                         | p.2                             |
| <b>INTRODUCTION</b>           |        |                                                                                                                                                                                                                                                                                                      |                                 |
| Rationale                     | 3      | Describe the rationale for the review in the context of existing knowledge.                                                                                                                                                                                                                          | p.4                             |
| Objectives                    | 4      | Provide an explicit statement of the objective(s) or question(s) the review addresses.                                                                                                                                                                                                               | p.4                             |
| <b>METHODS</b>                |        |                                                                                                                                                                                                                                                                                                      |                                 |
| Eligibility criteria          | 5      | Specify the inclusion and exclusion criteria for the review and how studies were grouped for the syntheses.                                                                                                                                                                                          | p.5-6                           |
| Information sources           | 6      | Specify all databases, registers, websites, organisations, reference lists and other sources searched or consulted to identify studies. Specify the date when each source was last searched or consulted.                                                                                            | p.5                             |
| Search strategy               | 7      | Present the full search strategies for all databases, registers and websites, including any filters and limits used.                                                                                                                                                                                 | Suppl. Material 1               |
| Selection process             | 8      | Specify the methods used to decide whether a study met the inclusion criteria of the review, including how many reviewers screened each record and each report retrieved, whether they worked independently, and if applicable, details of automation tools used in the process.                     | p.5-6                           |
| Data collection process       | 9      | Specify the methods used to collect data from reports, including how many reviewers collected data from each report, whether they worked independently, any processes for obtaining or confirming data from study investigators, and if applicable, details of automation tools used in the process. | p.6                             |
| Data items                    | 10a    | List and define all outcomes for which data were sought. Specify whether all results that were compatible with each outcome domain in each study were sought (e.g. for all measures, time points, analyses), and if not, the methods used to decide which results to collect.                        | p.6                             |
|                               | 10b    | List and define all other variables for which data were sought (e.g. participant and intervention characteristics, funding sources). Describe any assumptions made about any missing or unclear information.                                                                                         | p.6                             |
| Study risk of bias assessment | 11     | Specify the methods used to assess risk of bias in the included studies, including details of the tool(s) used, how many reviewers assessed each study and whether they worked independently, and if applicable, details of automation tools used in the process.                                    | p.6                             |
| Effect measures               | 12     | Specify for each outcome the effect measure(s) (e.g. risk ratio, mean difference) used in the synthesis or presentation of results.                                                                                                                                                                  | Not applicable                  |
| Synthesis methods             | 13a    | Describe the processes used to decide which studies were eligible for each synthesis (e.g. tabulating the study intervention characteristics and comparing against the planned groups for each synthesis (item #5)).                                                                                 | Not applicable                  |
|                               | 13b    | Describe any methods required to prepare the data for presentation or synthesis, such as handling of missing summary statistics, or data conversions.                                                                                                                                                | Not applicable                  |
|                               | 13c    | Describe any methods used to tabulate or visually display results of individual studies and syntheses.                                                                                                                                                                                               | Not applicable                  |
|                               | 13d    | Describe any methods used to synthesize results and provide a rationale for the choice(s). If meta-analysis was performed, describe the model(s), method(s) to identify the presence and extent of statistical heterogeneity, and software package(s) used.                                          | Not applicable                  |
|                               | 13e    | Describe any methods used to explore possible causes of heterogeneity among study results (e.g. subgroup analysis, meta-regression).                                                                                                                                                                 | Not applicable                  |
|                               | 13f    | Describe any sensitivity analyses conducted to assess robustness of the synthesized results.                                                                                                                                                                                                         | Not applicable                  |
| Reporting bias assessment     | 14     | Describe any methods used to assess risk of bias due to missing results in a synthesis (arising from reporting biases).                                                                                                                                                                              | Not applicable                  |
| Certainty                     | 15     | Describe any methods used to assess certainty (or confidence) in the body of evidence for an outcome.                                                                                                                                                                                                | Not applicable                  |

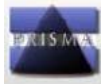

## PRISMA 2020 Checklist

| Section and Topic             | Item # | Checklist item                                                                                                                                                                                                                                                                       | Location where item is reported                                                                              |
|-------------------------------|--------|--------------------------------------------------------------------------------------------------------------------------------------------------------------------------------------------------------------------------------------------------------------------------------------|--------------------------------------------------------------------------------------------------------------|
| assessment                    |        |                                                                                                                                                                                                                                                                                      |                                                                                                              |
| <b>RESULTS</b>                |        |                                                                                                                                                                                                                                                                                      |                                                                                                              |
| Study selection               | 16a    | Describe the results of the search and selection process, from the number of records identified in the search to the number of studies included in the review, ideally using a flow diagram.                                                                                         | p.7 (and Figure 1)                                                                                           |
|                               | 16b    | Cite studies that might appear to meet the inclusion criteria, but which were excluded, and explain why they were excluded.                                                                                                                                                          | Figure 1                                                                                                     |
| Study characteristics         | 17     | Cite each included study and present its characteristics.                                                                                                                                                                                                                            | Table 1 (and suppl. Table S1)                                                                                |
| Risk of bias in studies       | 18     | Present assessments of risk of bias for each included study.                                                                                                                                                                                                                         | p.10                                                                                                         |
| Results of individual studies | 19     | For all outcomes, present, for each study: (a) summary statistics for each group (where appropriate) and (b) an effect estimate and its precision (e.g. confidence/credible interval), ideally using structured tables or plots.                                                     | Not applicable                                                                                               |
| Results of syntheses          | 20a    | For each synthesis, briefly summarise the characteristics and risk of bias among contributing studies.                                                                                                                                                                               | Not applicable                                                                                               |
|                               | 20b    | Present results of all statistical syntheses conducted. If meta-analysis was done, present for each the summary estimate and its precision (e.g. confidence/credible interval) and measures of statistical heterogeneity. If comparing groups, describe the direction of the effect. | Not applicable                                                                                               |
|                               | 20c    | Present results of all investigations of possible causes of heterogeneity among study results.                                                                                                                                                                                       | Not applicable                                                                                               |
|                               | 20d    | Present results of all sensitivity analyses conducted to assess the robustness of the synthesized results.                                                                                                                                                                           | Not applicable                                                                                               |
| Reporting biases              | 21     | Present assessments of risk of bias due to missing results (arising from reporting biases) for each synthesis assessed.                                                                                                                                                              | Not applicable                                                                                               |
| Certainty of evidence         | 22     | Present assessments of certainty (or confidence) in the body of evidence for each outcome assessed.                                                                                                                                                                                  | Not applicable                                                                                               |
| <b>DISCUSSION</b>             |        |                                                                                                                                                                                                                                                                                      |                                                                                                              |
| Discussion                    | 23a    | Provide a general interpretation of the results in the context of other evidence.                                                                                                                                                                                                    | p.20-22                                                                                                      |
|                               | 23b    | Discuss any limitations of the evidence included in the review.                                                                                                                                                                                                                      | p.22-23                                                                                                      |
|                               | 23c    | Discuss any limitations of the review processes used.                                                                                                                                                                                                                                | p.22-23                                                                                                      |
|                               | 23d    | Discuss implications of the results for practice, policy, and future research.                                                                                                                                                                                                       | p.23                                                                                                         |
| <b>OTHER INFORMATION</b>      |        |                                                                                                                                                                                                                                                                                      |                                                                                                              |
| Registration and protocol     | 24a    | Provide registration information for the review, including register name and registration number, or state that the review was not registered.                                                                                                                                       | Not registered                                                                                               |
|                               | 24b    | Indicate where the review protocol can be accessed, or state that a protocol was not prepared.                                                                                                                                                                                       | Registration on PROSPERO (CRD42020221973)                                                                    |
|                               | 24c    | Describe and explain any amendments to information provided at registration or in the protocol.                                                                                                                                                                                      | Adaptation of the framework used to analyze the data to better suit cardiovascular medications deprescribing |
| Support                       | 25     | Describe sources of financial or non-financial support for the review, and the role of the funders or sponsors in the review.                                                                                                                                                        | Swiss National                                                                                               |

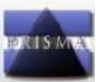

# PRISMA 2020 Checklist

1  
2  
3  
4  
5  
6  
7  
8  
9  
10  
11  
12  
13  
14  
15  
16  
17  
18  
19  
20  
21  
22  
23  
24  
25  
26  
27  
28  
29  
30  
31  
32  
33  
34  
35  
36  
37  
38  
39  
40  
41  
42  
43  
44  
45  
46  
47

| Section and Topic                              | Item # | Checklist item                                                                                                                                                                                                                             | Location where item is reported                                                                                          |
|------------------------------------------------|--------|--------------------------------------------------------------------------------------------------------------------------------------------------------------------------------------------------------------------------------------------|--------------------------------------------------------------------------------------------------------------------------|
|                                                |        |                                                                                                                                                                                                                                            | Science Foundation Grant IICT 33IC30-193052; grant from the College of General Internal Medicine (Fribourg, Switzerland) |
| Competing interests                            | 26     | Declare any competing interests of review authors.                                                                                                                                                                                         | None                                                                                                                     |
| Availability of data, code and other materials | 27     | Report which of the following are publicly available and where they can be found: template data collection forms; data extracted from included studies; data used for all analyses; analytic code; any other materials used in the review. | Available on demand                                                                                                      |

From: Page MJ, McKenzie JE, Bossuyt PM, Boutron I, Hoffmann TC, Mulrow CD, et al. The PRISMA 2020 statement: an updated guideline for reporting systematic reviews. *BMJ* 2021;372:n71. doi: 10.1136/bmj.n71  
 For more information, visit: <http://www.prisma-statement.org/>

Pre-review only

# BMJ Open

## Barriers and facilitators to deprescribing of cardiovascular medications: a systematic review

|                                 |                                                                                                                                                                                                                                                                                                                                                    |
|---------------------------------|----------------------------------------------------------------------------------------------------------------------------------------------------------------------------------------------------------------------------------------------------------------------------------------------------------------------------------------------------|
| Journal:                        | <i>BMJ Open</i>                                                                                                                                                                                                                                                                                                                                    |
| Manuscript ID                   | bmjopen-2022-061686.R2                                                                                                                                                                                                                                                                                                                             |
| Article Type:                   | Original research                                                                                                                                                                                                                                                                                                                                  |
| Date Submitted by the Author:   | 20-Sep-2022                                                                                                                                                                                                                                                                                                                                        |
| Complete List of Authors:       | Brunner, Laureline; University of Bern, Département des Vulnérabilités Rodondi, Nicolas; Inselspital Universitätsspital Bern; Universität Bern Berner Institut für Hausarztmedizin<br>Aubert, Carole; University of Bern, Institute for Primary Health Care (BIHAM); Inselspital University Hospital Bern, Department of General Internal Medicine |
| <b>Primary Subject Heading</b>: | Cardiovascular medicine                                                                                                                                                                                                                                                                                                                            |
| Secondary Subject Heading:      | Cardiovascular medicine                                                                                                                                                                                                                                                                                                                            |
| Keywords:                       | Adult cardiology < CARDIOLOGY, GERIATRIC MEDICINE, PRIMARY CARE, QUALITATIVE RESEARCH, VASCULAR MEDICINE                                                                                                                                                                                                                                           |
|                                 |                                                                                                                                                                                                                                                                                                                                                    |

SCHOLARONE™  
Manuscripts

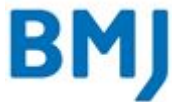

I, the Submitting Author has the right to grant and does grant on behalf of all authors of the Work (as defined in the below author licence), an exclusive licence and/or a non-exclusive licence for contributions from authors who are: i) UK Crown employees; ii) where BMJ has agreed a CC-BY licence shall apply, and/or iii) in accordance with the terms applicable for US Federal Government officers or employees acting as part of their official duties; on a worldwide, perpetual, irrevocable, royalty-free basis to BMJ Publishing Group Ltd ("BMJ") its licensees and where the relevant Journal is co-owned by BMJ to the co-owners of the Journal, to publish the Work in this journal and any other BMJ products and to exploit all rights, as set out in our [licence](#).

The Submitting Author accepts and understands that any supply made under these terms is made by BMJ to the Submitting Author unless you are acting as an employee on behalf of your employer or a postgraduate student of an affiliated institution which is paying any applicable article publishing charge ("APC") for Open Access articles. Where the Submitting Author wishes to make the Work available on an Open Access basis (and intends to pay the relevant APC), the terms of reuse of such Open Access shall be governed by a Creative Commons licence – details of these licences and which [Creative Commons](#) licence will apply to this Work are set out in our licence referred to above.

Other than as permitted in any relevant BMJ Author's Self Archiving Policies, I confirm this Work has not been accepted for publication elsewhere, is not being considered for publication elsewhere and does not duplicate material already published. I confirm all authors consent to publication of this Work and authorise the granting of this licence.



# Barriers and facilitators to deprescribing of cardiovascular medications: a systematic review

Laureline Brunner,<sup>1</sup> Nicolas Rodondi, MD, MAS,<sup>1,2</sup> Carole Elodie Aubert, MD, MSc,<sup>1,2</sup>

<sup>1</sup> Institute of Primary Health Care (BIHAM), University of Bern, Bern, Switzerland

<sup>2</sup> Department of General Internal Medicine, Inselspital, Bern University Hospital, University of Bern, Bern, Switzerland

Running title: Deprescribing cardiovascular medications

Corresponding author:

Carole E. Aubert, Department of General Internal Medicine, Inselspital, Bern University Hospital, University of Bern, Freiburgstrasse, CH-3010 Bern, Switzerland.  
carole.aubert@biham.unibe.ch

Number of tables and figures: 4

Abstract word count: 264

Word count: 4,188

1  
2  
3 **29 ABSTRACT**  
4

5 **30 Objective:** To synthesize the current knowledge on barriers and facilitators to deprescribing  
6  
7  
8 **31 cardiovascular medications (CVMs) at the levels of patients, informal caregivers, and**  
9  
10 **32 healthcare providers (HCPs).**

11  
12 **33 Design/Setting:** We conducted a systematic review of studies exploring/assessing patient,  
13  
14 **34 informal caregiver and/or HCP barriers and/or facilitators to deprescribing CVMs.**

15  
16 **35 Data sources:** Ovid/MEDLINE and Embase from January 2003 to November 2021.

17  
18 **36 Data extraction and synthesis:** We performed a deductive thematic analysis based on the  
19  
20 **37 framework of specific barriers and facilitators to deprescribing CVMs created by Goyal et al.**  
21  
22 **38 We added a quantification of the occurrence of categories and themes in the selected articles to**  
23  
24 **39 identify the resounding themes that indicate the greater impetus to address in future research.**

25  
26 **40 Results:** Most frequent deprescribing barriers for patients, informal caregivers and HCPs  
27  
28 **41 included uncertainty due to lack of evidence regarding CVM deprescribing (in n=10 studies),**  
29  
30 **42 fear of negative consequences following deprescribing (n=13), and social influences (n=14). A**  
31  
32 **43 frequently reported facilitator to deprescribing, especially for patients and informal caregivers,**  
33  
34 **44 was the occurrence of ADEs (n=7). Another frequently reported facilitator for patients were**  
35  
36 **45 dislike of CVMs (n=9). Necessity and benefit of CVMs were seen as barriers or facilitators**  
37  
38 **46 similarly by patients and HCPs.**

39  
40 **47 Conclusion:** The differences in patient, informal caregiver and HCP regarding barriers and  
41  
42 **48 facilitators to deprescribing CVMs stress the need for ground discussions about beliefs and**  
43  
44 **49 preferences of each stakeholder implicated in deprescribing decisions. Furthermore, HCP**  
45  
46 **50 uncertainty regarding CVM deprescribing highlights the need to provide HCPs with tools that**  
47  
48 **51 enable sharing the risks and benefits of deprescribing with patients and ensure a safe**  
49  
50 **52 deprescribing process.**

51  
52 **53 Review registration on Prospero: CRD42020221973**  
53  
54

1  
2  
3 55 Strengths and limitations of this study:  
4

- 5 56 • Systematic review process with publication review; data extraction, analysis and  
6  
7 synthesis; and quality assessment independently conducted by two independent  
8 57  
9 reviewers.  
10 58  
11  
12 59 • Assessment of both quantitative and qualitative studies, providing complementary  
13  
14 information on barriers and facilitators to deprescribing.  
15 60  
16  
17 61 • In some studies, cardiovascular medications were part of, but not the focus of the  
18  
19 medications evaluated.  
20 62  
21  
22 63 • We did not assess specific classes of cardiovascular medications.  
23  
24 64 • The majority of healthcare providers were general practitioners, whose perspectives  
25  
26 might differ from those of other healthcare providers.  
27 65  
28  
29 66

30  
31 67 Key words: cardiovascular medication, deprescribing, barriers, facilitators, older people  
32  
33  
34  
35  
36 69  
37  
38 70  
39  
40  
41  
42  
43  
44  
45  
46  
47  
48  
49  
50  
51  
52  
53  
54  
55  
56  
57  
58  
59  
60

## 71 1. Introduction

72 In recent years, a less-is-more attitude regarding medication use has pushed to reevaluate the  
73 balance between medication risks and benefits.<sup>(1)</sup> In this context, the notion of *deprescribing*  
74 emerged, which is defined as the “systematic process of identifying and discontinuing  
75 [medications] in instances in which existing or potential harms outweigh existing or potential  
76 benefits within the context of an individual patient’s care goals, current level of functioning,  
77 life expectancy, values and preferences”.<sup>(2)</sup>

78 Cardiovascular medications (CVMs) belong to the most prescribed medications worldwide.<sup>(3)</sup>  
79 Although their use is beneficial in many cases, CVMs can also cause significant adverse drug  
80 events (ADEs), drug-drug, and drug-disease interactions.<sup>(4-6)</sup> However, the lack of evidence  
81 regarding benefits and risks of some CVMs in primary prevention in older people or in those  
82 with limited life expectancy, may lead to insecurity of patients and prescribers regarding CVM  
83 use and deprescribing.<sup>(1, 7-11)</sup>

84 In this context, the decision to deprescribe a CVM often becomes a preference-sensitive  
85 decision.<sup>(12, 13)</sup> A better understanding of barriers and facilitators experienced by all  
86 stakeholders involved in decision-making regarding CVM deprescribing may help to take  
87 informed decisions in line with individual values and preferences, and increase confidence in  
88 the decision made.<sup>(14, 15)</sup> While literature exists on deprescribing general medications, we do not  
89 know if barriers and facilitators differ for deprescribing CVMs.

90 With this systematic review, we aimed at synthesizing the current knowledge on barriers and  
91 facilitators to deprescribing CVMs at the levels of patients, informal caregivers, and healthcare  
92 providers (HCPs).

93

94

95

96

## 97 2. Methods

98 We conducted a systematic review of studies assessing barriers and/or facilitators to  
99 deprescribing CVMs in adults. The review was registered on Prospero (CRD42020221973).

100

### 101 2.1. Types of studies and inclusion criteria

102 We included any type of publication – except editorials, conference abstracts and study  
103 protocols – discussing stakeholder barriers and/or facilitators regarding the process of  
104 deprescribing CVMs. Studies on prescribing, use, or adherence were not included. Studies  
105 reporting patients stopping CVMs without previous discussion with HCPs were considered as  
106 non-adherence studies and excluded.

107

### 108 2.2. Search strategy

109 We searched Ovid/MEDLINE and Embase from January 2003 to November 2021. We started  
110 the search in 2003 because it corresponds to the first mention of the term *deprescribing* in the  
111 literature.<sup>(16)</sup> We included studies published in English language and focusing on patients taking  
112 or having taken CVMs previously, and/or informal caregivers, and/or HCPs of such patients.  
113 We developed the 3 following concepts for our search strategy: 1) CVMs; 2) deprescribing; 3)  
114 barriers and facilitators. All three concepts were combined with the operator “and”. The detailed  
115 search strategy is provided in **Supplemental Material S1**.

116 LB and CEA independently reviewed all publications identified through the search strategy  
117 after removing duplicates. First, ineligible articles were excluded based on title/abstract.  
118 Second, full text of the remaining articles was reviewed to identify eligible studies. Reference  
119 lists of included publications were also searched for additional relevant articles (hand  
120 searching). Reviews and meta-analyses were kept in the first selection, but only original studies  
121 identified in the reference lists were included. For each step, LB and CEA resolved  
122 discrepancies by discussion.

### 123 2.3. Data extraction and analysis

124 Eligible articles were imported in MAXQDA 2020 data analysis software (VERBI Software,  
125 Berlin, Germany). Extracted data included author(s), year of publication, country, study design,  
126 setting, and population, and details on barriers and/or facilitators. Given the topic of this  
127 systematic review, we conducted a qualitative rather than a quantitative synthesis of the results.  
128 We performed a deductive thematic analysis to identify common and discrepant themes within  
129 and between stakeholder categories.<sup>(17, 18)</sup> The thematic analysis was based on the framework  
130 of specific barriers and facilitators to deprescribing CVMs created by Goyal et al.<sup>(4)</sup> This  
131 framework, based on Reeve's framework of patient barriers and facilitators to deprescribing  
132 medications,<sup>(19)</sup> includes the following categories: appropriateness of cessation, process of  
133 cessation, dislike of medications, fear, uncertainty, and conflicting attitudes. We analyzed  
134 patient and informal caregiver outputs together and HCP outputs separately, since we expected  
135 to identify different barriers and facilitators. In an iterative process, we created themes within  
136 the predefined categories. To identify the resounding themes that indicate the greater impetus  
137 to address in future research, we added a quantitative aspect to our thematic analysis, in which  
138 we identified the number of times each category and theme appeared in the selected studies.

### 140 2.4. Risk of bias and quality assessment

141 LB and CA conducted the quality and risk of bias assessment separately using the Mixed  
142 Methods Appraisal Tool (MMAT) 2018.<sup>(20, 21)</sup> The MMAT allows assessing the methodological  
143 quality of studies included in a systematic review encompassing both qualitative and  
144 quantitative data. Discussions were held until a consensus on quality of each study was reached.

### 146 2.5. Patient and Public Involvement:

147 Patients and Public were not involved in the design, conduct or reporting of this review, but in  
148 a follow-up project based on this review.

1  
2  
3 149 **3. Results**  
4

5 150 3.1. Study selection and characteristics  
6

7  
8 151 Among the 4,164 unique studies identified, 71 were included for full-text assessment (**Figure**  
9  
10 152 **1**). Among those, 16 fulfilled inclusion criteria. Through hand-searching, six additional studies  
11  
12 153 were included, leading to a total of 22 publications that were included for data extraction and  
13  
14 154 analysis. Ten studies focused on patients and/or informal caregivers, ten studies on HCPs and  
15  
16  
17 155 two studies on patients and/or informal caregivers and HCPs. Overall, the CVMs most  
18  
19 156 frequently discussed were lipid lowering therapies, especially statins (mentioned in 12 studies).  
20  
21 157 Eleven studies focused on older patients (median or mean patient age of 74 years) Among HCP  
22  
23  
24 158 studies, the most represented HCPs were general practitioners (in 10 studies). Study  
25  
26 159 characteristics are presented in **Tables 1** and detailed in **Supplemental Material S2**.  
27

28 160  
29  
30  
31  
32  
33  
34  
35  
36  
37  
38  
39  
40  
41  
42  
43  
44  
45  
46  
47  
48  
49  
50  
51  
52  
53  
54  
55  
56  
57  
58  
59  
60

1  
2  
3 161 **Table 1: main characteristics of studies reporting patient, informal caregiver and HCP barriers and facilitators to deprescribing CVMs**

4  
5  
6  
7  
8  
9  
10  
11  
12  
13  
14  
15  
16  
17  
18  
19  
20  
21  
22  
23  
24  
25  
26  
27  
28  
29  
30  
31  
32  
33  
34  
35  
36  
37  
38

| Patients and informal caregivers               | First author, publication year                | N population                        | Age                                                 | Studied CVM(s)                                                                           | Prevention type     |
|------------------------------------------------|-----------------------------------------------|-------------------------------------|-----------------------------------------------------|------------------------------------------------------------------------------------------|---------------------|
|                                                | Benson, 2005 (UK) <sup>(22)</sup>             | 38 patients                         | Any                                                 | Antihypertensives                                                                        | Unknown             |
|                                                | Brinton, 2018 (USA) <sup>(23)</sup>           | 5,014 patients                      | Mean age: 64 years                                  | Statins                                                                                  | Primary & secondary |
|                                                | Crutzen, 2020 (Netherlands) <sup>(24)</sup>   | 17 patients, 1 informal caregiver   | Median age: 78 years                                | Cardiometabolic medication                                                               | Primary & secondary |
|                                                | Goyal, 2020 (USA) <sup>(4)</sup>              | 10 patients                         | Median age: 80 years                                | β-blockers                                                                               | Primary & secondary |
|                                                | Jansen, 2019 (Australia) <sup>(25)</sup>      | 30 patients                         | ≥75 years                                           | Preventive CV medication                                                                 | Primary & secondary |
|                                                | Luymes, 2017 (Netherlands) <sup>(26)</sup>    | 33 patients                         | Mean age: 57 years                                  | Lipid-lowering drugs<br>Antihypertensives                                                | Primary             |
|                                                | Pickering, 2020 (USA) <sup>(27)</sup>         | 16 patients, 17 informal caregivers | Patients ≥ 65 years<br>Caregivers 22-69 years       | Unspecified (identified:<br>statins, antihypertensives,<br>antiplatelets, antidiabetics) | Primary & secondary |
|                                                | Qi, 2015 (Australia) <sup>(28)</sup>          | 180 patients                        | Median age: 78 years                                | Regular medications, statins                                                             | Primary & secondary |
|                                                | Tija, 2017 (USA) <sup>(29)</sup>              | 297 patients                        | Mean age: 72 years                                  | Statins                                                                                  | Primary & secondary |
| Van Bussel, 2019 (Netherlands) <sup>(30)</sup> | 15 patients                                   | Mean age: 81 years                  | Antihypertensives                                   | Primary                                                                                  |                     |
| HCPs                                           | First author, publication year                | N population                        | Characteristics of patients cared for by study HCPs |                                                                                          |                     |
|                                                |                                               |                                     | Age                                                 | Studies CVM(s)                                                                           | Prevention type     |
|                                                | Ailabouni, 2016 (New Zealand) <sup>(31)</sup> | 10 GPs                              | 83 years                                            | Antiplatelets, statin,<br>antidiabetics, diuretics, β-<br>blocker, ACE inhibitor         | Secondary           |
|                                                | Ailabouni, 2016 (New Zealand) <sup>(32)</sup> | 10 GPs                              | Unspecified (older pts)                             | Unspecified (identified:<br>statin and aspirin)                                          | Unknown             |
| Anderson, 2017 (Australia) <sup>(33)</sup>     | 32 GPs, 15 CPs                                | Unknown                             | Unspecified (identified:<br>statin)                 | Unknown                                                                                  |                     |



1  
2

|    |                                                    |                                                                                             |                                    |                                                                            |                        |
|----|----------------------------------------------------|---------------------------------------------------------------------------------------------|------------------------------------|----------------------------------------------------------------------------|------------------------|
| 3  | Geijteman, 2018 (Netherlands) <sup>(34)</sup>      | 174 GPs, 147 clinical specialists                                                           | 88 years                           | ACE inhibitor, statin, anticoagulant, diuretic, antidiabetic               | Secondary              |
| 4  |                                                    |                                                                                             |                                    |                                                                            |                        |
| 5  |                                                    |                                                                                             |                                    |                                                                            |                        |
| 6  |                                                    |                                                                                             |                                    |                                                                            |                        |
| 7  | Goyal, 2020 (USA) <sup>(35)</sup>                  | 184 geriatricians, 182 general internists, 87 cardiologists                                 | 79 years                           | 4 CV medications                                                           | Unknown                |
| 8  |                                                    |                                                                                             |                                    |                                                                            |                        |
| 9  |                                                    |                                                                                             |                                    |                                                                            |                        |
| 10 | Green, 2019 (USA) <sup>(36)</sup>                  | 19 physicians, 2 nurse practitioners                                                        | Unspecified (older pts)            | Unspecified (identified: statins, oral anticoagulants, antidiabetics)      | Unknown                |
| 11 |                                                    |                                                                                             |                                    |                                                                            |                        |
| 12 |                                                    |                                                                                             |                                    |                                                                            |                        |
| 13 | Jansen, 2017 (Australia) <sup>(37)</sup>           | 25 GPs                                                                                      | ≥75 years                          | Preventive CV medication                                                   | Primary                |
| 14 |                                                    |                                                                                             |                                    |                                                                            |                        |
| 15 | Thompson, 2020 (Denmark) <sup>(38)</sup>           | 11 GPs                                                                                      | ≥ 80 years                         | Statins                                                                    | Unknown                |
| 16 |                                                    |                                                                                             |                                    |                                                                            |                        |
| 17 | Van Middelaar, 2020 (Netherlands) <sup>(39)</sup>  | 15 GPs                                                                                      | Unspecified (older pts)            | Antihypertensives                                                          | Unknown                |
| 18 |                                                    |                                                                                             |                                    |                                                                            |                        |
| 19 | Van der Ploeg, 2018 (30 countries) <sup>(40)</sup> | 2250 GPs                                                                                    | ≥ 80 years                         | Statins                                                                    | Primary & secondary    |
| 20 | <b>First author, publication year</b>              | <b>N population</b>                                                                         | <b>Characteristics of patients</b> |                                                                            |                        |
| 21 |                                                    |                                                                                             | <b>Age</b>                         | <b>Studied CVM(s)</b>                                                      | <b>Prevention type</b> |
| 22 |                                                    |                                                                                             |                                    |                                                                            |                        |
| 23 | Luymes, 2016 (Netherlands) <sup>(41)</sup>         | 10 GPs, 49 patients                                                                         | Median age: 55 years               | Antihypertensives, lipid-lowering drugs                                    | Primary                |
| 24 |                                                    |                                                                                             |                                    |                                                                            |                        |
| 25 |                                                    |                                                                                             |                                    |                                                                            |                        |
| 26 | Todd, 2016 (UK) <sup>(42)</sup>                    | 12 patients, 12 informal caregivers, 3 palliative consultants, 3 nurse practitioners, 6 GPs | Any                                | Unspecified (preventive medications, including statins, antihypertensives) | Unknown                |
| 27 |                                                    |                                                                                             |                                    |                                                                            |                        |
| 28 |                                                    |                                                                                             |                                    |                                                                            |                        |
| 29 |                                                    |                                                                                             |                                    |                                                                            |                        |
| 30 |                                                    |                                                                                             |                                    |                                                                            |                        |

Patients &amp; informal caregivers &amp; HCPS

162

163

164

165

166

167

168

169

170

171

172

173

174

175

176

177

178

**Abbreviations:** ACE inhibitors: angiotensin-converting enzyme inhibitors; CPs: community pharmacists; CV: cardiovascular; CVM(s): cardiovascular medication(s); GPs: general practitioners; pts: patients

### 168 3.2. Quality assessment

169 Details of each study quality assessment can be found in **Supplemental Material S3**. Of the  
170 15 qualitative studies included in this systematic review, 14 were deemed of good quality,<sup>(4, 22,</sup>  
171 24, 25, 27, 30, 31, 33, 36-39, 41, 42) while one lacked data to support interpretation of the results.<sup>(32)</sup> Five  
172 of the six included quantitative studies did not provide sample representative of the target  
173 population, as nonresponse was high, increasing the risk of nonresponse bias.<sup>(28, 29, 34, 35, 40)</sup> The  
174 sixth quantitative study provided few details on the method used for data analysis.<sup>(23)</sup> The only  
175 mixed methods study included failed to address divergences between quantitative and  
176 qualitative results.<sup>(26)</sup> We did not exclude any study based on the quality assessment, as our aim  
177 was to describe all available data regarding barriers and facilitators to deprescribing CVMs.

### 179 3.3. Thematic analysis

180 Following the framework of Goyal et al.,<sup>(4)</sup> seven categories were created to describe patient  
181 and HCP main barriers and facilitators to deprescribing CVMs. Categories one and four were  
182 divided into three and two themes respectively. Differences between patients, informal  
183 caregivers and HCPs, as well as across HCP categories, are highlighted when relevant. HCPs  
184 other than general practitioners (GPs, including general internists and family medicine  
185 clinicians) are regrouped under the term “specialists”. Differences across specialties are  
186 highlighted when relevant. Of the 22 articles, all encompassed barriers and facilitators to  
187 deprescribing CVMs, except for one (Brinton et al. reported only facilitators)<sup>(23)</sup>. Barriers and  
188 facilitators did not appear to differ significantly between studies assessing different CVMs. All  
189 barriers and facilitators according to categories, themes and stakeholders, are displayed in  
190 **Table 2**. The facilitators most frequently mentioned by patients were ADE occurrence and  
191 dislike, respectively reported in seven and nine studies (n=7 and n=9), as shown in **Table 3**.  
192 The facilitator most commonly reported by HCPs was the lack of benefit (reported in n=7). One  
193 of the barriers most frequently cited by patients/informal caregivers and HCPs was fear,

1  
2  
3 194 reported in n=7. Social influences were another barrier frequently mentioned by HCPs (reported  
4  
5 195 in n=10). Additional frequent barriers were uncertainty for HCPs (reported in n=7), and  
6  
7 196 perceived benefit and social influences for patients and informal caregivers (reported in n=6).  
8  
9  
10  
11  
12  
13  
14  
15  
16  
17  
18  
19  
20  
21  
22  
23  
24  
25  
26  
27  
28  
29  
30  
31  
32  
33  
34  
35  
36  
37  
38  
39  
40  
41  
42  
43  
44  
45  
46  
47  
48  
49  
50  
51  
52  
53  
54  
55  
56  
57  
58  
59  
60

For peer review only

197 **Table 2: Summary of categories, themes and codes of barriers and facilitators to deprescribing CVMs**

| Categories      | Themes       | Barriers or facilitators                                                                                                               | Patients and/or informal caregivers                                                                                                                                                                            | HCPs                                                                                                                                 | HCPs and patients and/or informal caregivers                                    |
|-----------------|--------------|----------------------------------------------------------------------------------------------------------------------------------------|----------------------------------------------------------------------------------------------------------------------------------------------------------------------------------------------------------------|--------------------------------------------------------------------------------------------------------------------------------------|---------------------------------------------------------------------------------|
| Appropriateness | Necessity    | Facilitators                                                                                                                           | Low CV risk<br>Disease under control<br>Trigger disappearance                                                                                                                                                  | Primary prevention<br>Age as single CVRF                                                                                             |                                                                                 |
|                 |              | Barriers                                                                                                                               | CVM linked to survival                                                                                                                                                                                         | Unhealthy lifestyle<br>Many CVRFs                                                                                                    | Past CV event<br>Family history of CVD<br>CVM should be taken until end of life |
|                 | Benefit      | Facilitators                                                                                                                           | Robustness                                                                                                                                                                                                     | Short life expectancy<br>Cognitive impairment<br>Nursing home patients<br>Palliative patients                                        | No objective improvement under CVM<br>No subjective improvement under CVM       |
|                 |              | Barriers                                                                                                                               | Frailty<br>CVM use = active contribution to health<br>CVM use = having control over one's self                                                                                                                 | Good physical & cognitive function<br>Few comorbidities                                                                              | Objective improvement under CVM<br>Subjective improvement under CVM             |
|                 | ADEs         | Facilitators                                                                                                                           | ADEs foster deprescribing discussion with HCP                                                                                                                                                                  |                                                                                                                                      | Reduction in QOL through ADEs                                                   |
|                 |              | Barriers                                                                                                                               | ADEs balanced against reasons to take CVMs                                                                                                                                                                     | ADEs in patients with CVD                                                                                                            | No ADE, no symptom from disease                                                 |
| Fear            | Facilitators | Fear of ADEs<br>Fear of becoming dependent on CVMs                                                                                     |                                                                                                                                                                                                                |                                                                                                                                      |                                                                                 |
|                 | Barriers     | Fear of deprescribing due to severity of underlying disease<br>Fear of experiencing a CV event after deprescribing & becoming a burden | Feeling of giving up on patients                                                                                                                                                                               | Fear of CV event, return of previous condition, health deterioration following deprescribing<br>Fear of shorter lifespan without CVM |                                                                                 |
| Dislike         |              | Facilitators                                                                                                                           | General dislike of medications<br>Medication-associated costs<br>Living a long life without using CVMs<br>Pride in not taking medications<br>CVMs = poison<br>CVMs = bad for health<br>Therapeutic competition |                                                                                                                                      |                                                                                 |

|             |                      |                              |                                                                                                                                     |                                                                                                                                                                                 |                                                                              |
|-------------|----------------------|------------------------------|-------------------------------------------------------------------------------------------------------------------------------------|---------------------------------------------------------------------------------------------------------------------------------------------------------------------------------|------------------------------------------------------------------------------|
| Influences  | Previous experiences | Facilitators                 |                                                                                                                                     |                                                                                                                                                                                 | Positive previous experience with deprescribing (QOL improvement, no stroke) |
|             |                      | Barriers                     |                                                                                                                                     |                                                                                                                                                                                 | Negative previous experience with deprescribing (restart medication, stroke) |
|             | Social influences    | Facilitators                 | HCPs (especially GP) advising deprescribing                                                                                         | Patient's preferences                                                                                                                                                           |                                                                              |
|             |                      | Barriers                     | HCPs (especially GP) advising against deprescribing                                                                                 | Patient's preferences (reluctance)<br>Patient's lack of understanding<br>Patient's family wants CVMs<br>Specialist prescription<br>Interference with other HCPs' treatment plan |                                                                              |
| Process     |                      | Facilitators                 | Temporary deprescribing trial<br>Possibility of CVM resumption                                                                      |                                                                                                                                                                                 | Dose-lowering scheme<br>Close monitoring                                     |
|             |                      | Barriers                     |                                                                                                                                     | Lack of remuneration for close monitoring                                                                                                                                       | Time constraints                                                             |
| Uncertainty |                      | Facilitators                 |                                                                                                                                     |                                                                                                                                                                                 | Uncertainty about possible consequences of taking CVMs                       |
|             |                      | Barriers                     | Lack of understanding of CVDs and risk reduction with CVMs<br>Uncertainty about risks and benefits<br>Conflicting treatment targets | Lack of evidence on deprescribing<br>Uncertainty about when to deprescribe<br>Uncertainty about risk-benefit balance<br>Limited training on deprescribing                       | Unknown consequences of deprescribing                                        |
| Ambivalence |                      | Facilitators and/or barriers | Concern about CVM effect on health vs consequences of not taking CVMs<br>Aversion towards CVMs vs obligation to take CVMs           |                                                                                                                                                                                 |                                                                              |

**Abbreviations:** ADEs: adverse drug events; CV: cardiovascular; CVD: cardiovascular disease; CVM: cardiovascular medication; CVRF: cardiovascular risk factor; GP: general practitioner; HCPs: healthcare providers; QOL: quality of life

1  
2  
3  
4  
5  
6  
7  
8  
9  
10  
11  
12  
13  
14  
15  
16  
17  
18  
19  
20  
21  
22  
23  
24  
25  
26  
27  
28  
29  
30  
31  
32  
33  
34  
35  
36  
37  
38  
39  
40  
41  
42  
43  
44  
45  
46

202 **Table 3: Occurrence of categories and themes in the included studies**

| Author                                                        | Facilitators    |         |      |      |         |            |     |         | Barriers    |                 |         |      |      |            |     |         | Facilitators & barriers |             |             |
|---------------------------------------------------------------|-----------------|---------|------|------|---------|------------|-----|---------|-------------|-----------------|---------|------|------|------------|-----|---------|-------------------------|-------------|-------------|
|                                                               | Appropriateness |         |      | Fear | Dislike | Influences |     | Process | Uncertainty | Appropriateness |         |      | Fear | Influences |     | Process |                         | Uncertainty | Ambivalence |
|                                                               | Necessity       | Benefit | ADEs |      |         | Social     | Exp |         |             | Necessity       | Benefit | ADEs |      | Social     | Exp |         |                         |             |             |
| <b>Patients and informal caregivers</b>                       |                 |         |      |      |         |            |     |         |             |                 |         |      |      |            |     |         |                         |             |             |
| Benson <sup>(22)</sup>                                        |                 |         | x    |      |         |            | x   |         |             |                 | x       | x    |      |            |     |         |                         |             |             |
| Brinton <sup>(23)</sup>                                       |                 | x       | x    |      | x       |            |     |         |             |                 |         |      |      |            |     |         |                         |             |             |
| Crutzen <sup>(24)</sup>                                       |                 |         | x    | x    | x       | x          | x   | x       |             |                 | x       |      | x    | x          | x   | x       | x                       |             |             |
| Goyal <sup>(4)</sup>                                          |                 | x       | x    |      | x       |            |     | x       |             | x               | x       |      | x    |            |     |         | x                       | x           |             |
| Jansen <sup>(25)</sup>                                        |                 |         | x    |      | x       | x          |     | x       |             | x               | x       |      | x    | x          |     |         |                         |             |             |
| Luymes <sup>(26)</sup>                                        | x               |         |      |      | x       | x          |     |         |             | x               |         |      | x    | x          |     |         |                         |             |             |
| Pickering <sup>(27)</sup>                                     |                 |         | x    |      | x       | x          |     |         |             |                 | x       |      | x    | x          |     |         |                         |             |             |
| Qi <sup>(28)</sup>                                            |                 | x       |      | x    |         | x          |     |         |             |                 | x       |      |      |            |     |         |                         |             |             |
| Tija <sup>(29)</sup>                                          |                 |         |      | x    |         |            |     |         |             | x               |         |      |      |            |     |         |                         |             |             |
| Van Busse <sup>(30)</sup>                                     | x               |         | x    |      | x       |            |     |         |             |                 |         | x    | x    | x          |     |         | x                       | x           |             |
| <b>Healthcare providers</b>                                   |                 |         |      |      |         |            |     |         |             |                 |         |      |      |            |     |         |                         |             |             |
| Ailabouni <sup>(31)</sup>                                     |                 |         |      |      |         |            | x   |         |             |                 |         |      | x    | x          |     |         |                         | x           |             |
| Ailabouni <sup>(32)</sup>                                     |                 |         | x    |      |         |            |     | x       |             |                 | x       |      | x    | x          |     |         |                         |             |             |
| Anderson <sup>(33)</sup>                                      |                 | x       | x    |      |         | x          | x   | x       | x           |                 | x       |      | x    | x          | x   | x       | x                       | x           |             |
| Geijteman <sup>(34)</sup>                                     |                 | x       | x    |      |         |            |     |         |             |                 |         |      |      |            | x   | x       |                         |             |             |
| Goyal <sup>(35)</sup>                                         |                 | x       | x    |      |         |            |     |         |             |                 |         |      | x    | x          |     | x       | x                       |             |             |
| Green <sup>(36)</sup>                                         |                 | x       |      |      |         |            |     |         |             |                 |         |      | x    | x          | x   | x       | x                       |             |             |
| Jansen <sup>(37)</sup>                                        | x               | x       |      |      |         | x          |     |         |             |                 | x       |      |      | x          |     |         |                         | x           |             |
| Thompson <sup>(38)</sup>                                      |                 | x       |      |      |         | x          |     |         |             | x               | x       |      |      |            |     |         |                         |             |             |
| Van Middelaar <sup>(39)</sup>                                 |                 |         | x    |      |         | x          | x   |         |             | x               | x       | x    | x    | x          | x   | x       | x                       | x           |             |
| Van der Ploeg <sup>(40)</sup>                                 | x               | x       |      |      |         | x          |     |         |             |                 |         | x    |      | x          |     |         |                         |             |             |
| <b>Patients, informal caregivers and healthcare providers</b> |                 |         |      |      |         |            |     |         |             |                 |         |      |      |            |     |         |                         |             |             |
| Luyme <sup>(41)</sup>                                         | x               |         |      |      | x       | x          |     | x       |             | x               |         |      | x    | x          | x   | x       |                         |             |             |
| Todd <sup>(42)</sup>                                          |                 |         |      |      | x       |            |     |         |             | x               |         |      |      | x          |     |         |                         |             |             |

203  
204 **Legend:** “x” means that the category/theme was mentioned in the article.

205 **Abbreviations:** exp: previous experiences; social: social influences

### 206 3.3.1. Appropriateness

207 Patient and HCP agreement or disagreement with appropriateness of CVM deprescribing were  
208 based on three main themes: CVM necessity, CVM benefit, and ADE occurrence. While CVM  
209 necessity and benefit were almost as frequently mentioned as facilitators than as barriers, ADE  
210 occurrence was clearly reported as a facilitator to deprescribing (n=12).

#### 212 3.3.1.1 Necessity

213 Patients more often reported their necessity of the CVMs (n=5 for necessity as a barrier to  
214 deprescribing)<sup>(4, 25, 26, 29, 42)</sup> than their non-necessity (n=3)<sup>(26, 30, 41)</sup>. Necessity was a theme less  
215 reported by HCPs (n=3 for necessity as a barrier to deprescribing,<sup>(38, 39, 41)</sup> and n=2 for non-  
216 necessity as a facilitator)<sup>(37, 40)</sup>. Patients in three studies considered taking CVMs as a necessity,  
217 even an obligation, especially in case of past cardiovascular (CV) event or family history of  
218 cardiovascular disease (CVD).<sup>(25, 26, 41)</sup> This view was shared by GPs in two studies, who also  
219 deemed necessary to treat patients with unhealthy lifestyle, or presenting many cardiovascular  
220 risk factors (CVRF).<sup>(39, 41)</sup> Patients and one GP even stated that CVMs should not be stopped  
221 until the end of life,<sup>(25, 29, 38, 42)</sup> while other patients considered CVMs linked to their survival.<sup>(4)</sup>  
222 Contrastively, patients at low CV risk and GPs treating patients in primary prevention or  
223 patients without any CVRF other than age, considered CVMs less necessary.<sup>(26, 37, 40, 41)</sup> Some  
224 patients questioned the continuous necessity of their CVM, as they felt that their disease was  
225 well-controlled.<sup>(30, 41)</sup>

#### 227 3.3.1.2 Benefit

228 CVM benefit was a frequently reported theme by patients/informal caregivers (n=7)<sup>(4, 22-25, 27,</sup>  
229 <sup>28)</sup> – more often as a barrier (i.e., perception of benefit in n=6)<sup>(4, 22, 24, 25, 27, 28)</sup>. CVM benefit was  
230 also frequently reported by HCPs (n=9)<sup>(32-40)</sup>, however more often as a facilitator (i.e., lack of  
231 benefit of CVMs in n=7)<sup>(33-38, 40)</sup>. GPs were more inclined to continue treating patients with

1  
2  
3 232 good physical and cognitive function or few comorbidities, especially if they presented no  
4  
5 233 CVM-related ADEs, expecting them to derive a higher benefit from CVMs.<sup>(32, 33, 37-39)</sup> In  
6  
7 234 contrast, GPs and specialists considered patients with a short life expectancy, cognitive  
8  
9 235 impairment, or living in palliative/nursing homes less likely to benefit from CVMs.<sup>(33-38, 40)</sup>  
10  
11 236 They felt that, in these cases, prolonging life or avoiding a CV event should not be the main  
12  
13 237 objective of care.<sup>(37)</sup> However, frail patients were less willing to stop their statin than robust  
14  
15 238 ones.<sup>(28)</sup>

16  
17 239 Some patients and informal caregivers also considered CVMs to be beneficial when they saw  
18  
19 240 an objective (e.g., cholesterol levels) or subjective (e.g., less dizziness) improvement under  
20  
21 241 treatment.<sup>(4, 22, 24, 27)</sup> Some patients also considered that taking CVMs enabled them to make an  
22  
23 242 active contribution to their health, and to have control over themselves and the future.<sup>(25)</sup>

24  
25  
26  
27  
28  
29 243

### 30 244 **3.3.1.3 ADEs**

31  
32 245 Patients, informal caregivers and HCPs reported ADEs as one of the main facilitators to  
33  
34 246 stopping CVMs, especially if ADEs were associated with a reduction in quality of life (n=7 for  
35  
36 247 patients and n=5 for HCPs).<sup>(4, 22-25, 27, 30, 32-35, 39)</sup> Patients usually compliant with medications  
37  
38 248 considered ADEs as a reason to discuss deprescribing with their GP.<sup>(25, 30)</sup> Patients considering  
39  
40 249 taking CVMs as a routine to stay healthy were still willing to discontinue their CVMs in case  
41  
42 250 of ADEs.<sup>(25, 30)</sup> ADEs were not formally reported as barriers to deprescribing, but were put in  
43  
44 251 perspective by patients/informal caregivers (n=2)<sup>(22, 30)</sup> and HCPs (n=2).<sup>(39, 40)</sup> Some patients  
45  
46 252 continued taking their CVMs after balancing ADEs against reasons to take CVMs (i.e., CVM  
47  
48 253 perceived benefit, minor ADEs).<sup>(22)</sup> When patients were asymptomatic and had no ADE,  
49  
50 254 patients and GPs were unwilling to deprescribe CVMs.<sup>(30, 39)</sup> When ADEs occurred in patients  
51  
52 255 with CVD, GPs were also unwilling to deprescribe.<sup>(40)</sup>

53  
54  
55  
56  
57  
58 256

59  
60 257



### 258 3.2. Fear

259 Fear of consequences following CVM deprescribing was reported as a barrier to deprescribing  
260 by patients/informal caregivers (n=7)<sup>(4, 24-27, 30, 41)</sup> and HCPs (n=7).<sup>(31-33, 35, 36, 39, 41)</sup> In multiple  
261 studies, patients stated their fear of a return of the previous condition, health deterioration,  
262 becoming a burden, or a shorter lifespan following deprescribing.<sup>(4, 25-27, 30, 41)</sup> Some linked this  
263 fear with the perceived severity of their disease.<sup>(24, 27)</sup> These concerns were shared by informal  
264 caregivers. GPs and specialists feared harming patients by deprescribing (e.g., occurrence of  
265 CV event with functional limitation, death),<sup>(31-33, 35, 36, 39, 41)</sup> and giving patients the feeling that  
266 they were giving up on them, especially by deprescribing towards the end of life, a feeling not  
267 shared by patients.<sup>(29, 31, 34, 36, 39)</sup>  
268 Conversely, patients fearing ADEs or becoming “dependent” on their CVMs were more willing  
269 to deprescribe (n=3).<sup>(24, 28, 29)</sup> HCPs did not report fear as a facilitator (n=0).

### 271 3.3. Dislike

272 CVM dislike was a facilitator to deprescribing for patients and informal caregivers (n=9),<sup>(4, 23-  
273 27, 30, 41, 42)</sup> but not for HCPs (n=0). Dislike was never reported as a barrier by patients/informal  
274 caregivers (n=0) or by HCPs (n=0). Patients stated a general dislike of medications or explained  
275 feeling burdened by the number of medications (CVMs and others), or medication-associated  
276 costs.<sup>(4, 23-25, 27, 30, 41, 42)</sup> Other patients were aiming at living a long life without using  
277 medications, or derived a personal pride of not taking medications.<sup>(25, 26)</sup> Some patients and  
278 informal caregivers considered CVMs as “not good for health”<sup>(24)</sup> or despised CVMs that  
279 created therapeutic competition (i.e., helping one condition while worsening another one) or  
280 which administration was complicated or disrupted daily routine (e.g., glycaemia before insulin  
281 injections).<sup>(4, 27)</sup>

282

283

### 284 **3.4. Influences**

285 Patient and HCP opinions towards deprescribing were shaped by their previous experiences in  
286 deprescribing CVMs, and by social influences. While social influences were reported as a  
287 barrier (n=4)<sup>(25-27, 30)</sup> almost as frequently as a facilitator (n=6)<sup>(24-28, 41)</sup> by patients and informal  
288 caregivers, they were more frequently reported as a barrier (n=10)<sup>(31-33, 35-37, 39-42)</sup> to  
289 deprescribing by HCPs. Previous experiences were less reported than social influences and  
290 almost as often by patients and informal caregivers (reported both as a facilitator and a barrier  
291 in n=2)<sup>(22, 24, 41)</sup> as by HCPs (reported as a facilitator in n=3<sup>(31, 33, 39)</sup> and as a barrier in n=4).<sup>(33,</sup>  
292 36, 39, 41)

#### 294 **3.4.1 Previous experiences**

295 Patients and HCPs with a positive previous experience with CVM deprescribing were more  
296 amenable to deprescribe again, as opposed to those with a negative previous experience.<sup>(4, 24, 31,</sup>  
297 33, 36, 39, 41) GPs considered patients feeling better or with improved quality of life after  
298 deprescribing as positive experiences,<sup>(31, 39)</sup> and having to restart medications after  
299 deprescribing as a negative experience.<sup>(39)</sup> For statins, occurrence or absence of stroke after  
300 deprescribing influenced GPs' and specialists' further actions.<sup>(33, 36)</sup>

#### 302 **3.4.2 Social influences**

303 HCPs influenced patients' and informal caregivers' opinion on deprescribing.<sup>(27, 28)</sup> Patients  
304 were willing to stop one or more CVM if this was proposed by a trusting physician.<sup>(24)</sup> Patients  
305 especially trusted their GP because of their knowledge and the fact that they knew them well.<sup>(25,</sup>  
306 26, 30, 41) Some patients also recognized their dependency towards their GP and highlighted their  
307 authority, feeling that it would be inappropriate to discuss their evaluation.<sup>(30)</sup> Others were  
308 waiting for their GP to start discussions about preferences, or were happy to follow their  
309 recommendations.<sup>(25, 30)</sup>

1  
2  
3 310 GPs accounted for patient preferences.<sup>(33, 37-40)</sup> They considered deprescribing in patients  
4  
5 311 wanting to take less medications.<sup>(37, 38)</sup> They continued CVMs in patients expecting longevity  
6  
7 312 or whose family was urging for medication continuation.<sup>(37)</sup> GPs were also unwilling to  
8  
9 313 deprescribe CVMs prescribed by specialists, even if they questioned the indication.<sup>(31-33, 37, 41)</sup>  
10  
11 314 Specialists were concerned by interfering with other HCPs' treatment plan.<sup>(35, 36)</sup> They were  
12  
13 315 also unwilling to deprescribe when communication with other HCPs was suboptimal or when  
14  
15 316 patients were reluctant or could not understand the concept of deprescribing.<sup>(35, 42)</sup>  
16  
17  
18  
19  
20  
21

### 22 318 **3.5. Process**

23  
24 319 The process required to deprescribe CVMs was more frequently reported as a barrier (n=6)<sup>(33-</sup>  
25  
26 320 <sup>36, 39, 41)</sup> than as a facilitator (n=2)<sup>(32, 33)</sup> by HCPs. For patients and informal caregivers, this  
27  
28 321 process was more frequently reported as a facilitator (n=4)<sup>(4, 24, 25, 41)</sup> than a barrier (n=2).<sup>(24, 41)</sup>  
29  
30 322 HCPs and patients reported time constraint, such as lacking time to review medication lists or  
31  
32 323 to discuss CVMs, as a barrier to CVM deprescribing.<sup>(24, 34-36, 39)</sup>  
33  
34 324 For patients, a dose-lowering scheme, a close monitoring after deprescribing and a temporary  
35  
36 325 stopping trial with possibility of medication resumption facilitated the deprescribing process.<sup>(4,</sup>  
37  
38 326 <sup>24, 25, 41)</sup> GPs also viewed gradual CVM discontinuation as a facilitator to deprescribing,  
39  
40 327 especially when they were unsure about CVM risk/benefit ratio.<sup>(32, 33)</sup> However, they considered  
41  
42 328 the lack of remuneration for the close follow-up needed during gradual discontinuation as a  
43  
44 329 barrier.<sup>(33)</sup>  
45  
46  
47  
48

49 330

### 51 331 **3.6. Uncertainty**

52  
53 332 Uncertainty was reported more often by HCPs (n=7)<sup>(31, 33-37, 39)</sup> than patient and informal  
54  
55 333 caregiver (n=3),<sup>(4, 24, 30)</sup> and acted almost exclusively as a barrier to deprescribing for both  
56  
57 334 groups. HCPs formulated the lack of evidence about CVM deprescribing as a barrier, especially  
58  
59 335 in older patients or those with dementia.<sup>(31, 35, 36)</sup> GPs found complicated to know when to  
60

1  
2  
3 336 deprescribe preventive medications – especially in patients neither frail nor robust<sup>(31, 39)</sup> – and  
4  
5 337 how to balance CVM harms and benefits when approaching deprescribing.<sup>(37)</sup> One clinical  
6  
7 338 pharmacist explained having difficulties making professional recommendations about statin  
8  
9 339 deprescribing in older patients.<sup>(33)</sup> Specialists regretted the limited training on deprescribing.<sup>(35)</sup>  
10  
11 340 Patients expressed a lack of understanding of CVDs and risk reduction with CVMs, as well as  
12  
13 341 uncertainty regarding potential risks and benefits of CVMs, thus feeling uncertain about the  
14  
15 342 value of deprescribing.<sup>(4, 24, 30)</sup> They were also confused by conflicting treatment targets  
16  
17 343 mentioned by HCPs.<sup>(24)</sup>  
18  
19 344 Some HCPs and patients also felt uneasy about the uncertainty surrounding possible  
20  
21 345 consequences of CVM deprescribing.<sup>(33, 34, 41)</sup> This led to “therapeutic inertia”, even in case of  
22  
23 346 unclear benefits of pursuing CVMs.<sup>(36)</sup> On the contrary, GPs and clinical pharmacists feeling  
24  
25 347 uneasy about possible long-term consequences of taking CVMs were more willing to  
26  
27 348 deprescribe.<sup>(33)</sup>  
28  
29  
30  
31  
32

33 349

### 35 350 **3.7. Ambivalence**

36  
37 351 Patients expressed ambivalence about CVM use, prompting them to wish CVM continuation  
38  
39 352 and deprescribing concurrently (n=2).<sup>(4, 30)</sup> They were concerned about the effects of CVMs on  
40  
41 353 their health, but also about what could happen if they did not take them.<sup>(4)</sup> They also showed  
42  
43 354 aversion towards CVMs coupled with a feeling of obligation to take them.<sup>(4, 30)</sup> HCPs did not  
44  
45 355 express ambivalence (n=0).  
46  
47  
48

49 356

50 357

51 358

52 359

53 360

54 361

#### 362 4. Discussion

363 In this systematic review, we provided an overview of barriers and facilitators to deprescribing  
364 CVMs, from the point of view of patients, informal caregivers and HCPs. Barriers and  
365 facilitators could be classified in the following categories: appropriateness, fear, dislike,  
366 influences, process, uncertainty, and ambivalence. Appropriateness was divided into three  
367 themes (necessity, benefit, ADEs), and influences into two (previous experiences, social  
368 influences). Frequent deprescribing barriers for both HCPs and patients/informal caregivers  
369 included influences of others on the decision, and fear of negative consequences following  
370 CVM deprescribing. Another barrier frequently mentioned by HCPs was the uncertainty to  
371 deprescribe due to the lack of evidence regarding CVM deprescribing. The occurrence of ADEs  
372 was frequently reported as a facilitator to deprescribing, especially by patients and informal  
373 caregivers. Another facilitator for patients was dislike of CVMs. Necessity and benefit of  
374 CVMs were seen as barriers or facilitators similarly by patients and HCPs. However, patients  
375 and HCPs disagreed on the necessity and benefit of taking CVMs in case of frailty or robustness.  
376 The process required to deprescribe CVMs acted both as barrier and facilitator for patients and  
377 was more often reported as a barrier than as a facilitator by HCPs.

378  
379 While there is increasing literature on barriers and facilitators to deprescribing, there is little  
380 literature focusing specifically on barriers and facilitators to deprescribing CVMs. Our review  
381 provides readers with a current state of the knowledge on the perspectives of different  
382 stakeholders (i.e., patients, informal caregivers and HCPs) regarding deprescribing of such  
383 medications and its specific challenges. Other studies focusing on deprescribing of other  
384 medication types or potentially inappropriate medications showed barriers and facilitators that  
385 were similar to some found in our review<sup>(43-47)</sup>. On the patient level, these studies reported  
386 experiencing ADEs or feeling burdened by the medications as facilitators,<sup>(46, 47)</sup> and seeing the  
387 medications as necessary or beneficial as a barrier.<sup>(45)</sup> On the HCP level, these studies reported

1  
2  
3 388 gradual deprescribing as a facilitator,<sup>(46)</sup> and fear of unknown or negative consequences  
4  
5 389 following deprescribing, or like of time to approach deprescribing as barriers.<sup>(43, 44, 46)</sup>  
6  
7  
8 390 Furthermore, a systematic review on patient barriers and facilitators to deprescribing also  
9  
10 391 reported agreement with appropriateness of cessation, fear, influences, dislike and process as  
11  
12 392 barriers and/or facilitators to deprescribing.<sup>(19)</sup> However, this review that included mainly  
13  
14 393 nervous system medications, did not report uncertainty and ambivalence towards deprescribing.  
15  
16  
17 394 This suggests that these two factors are more specific to CVM deprescribing and might reflect  
18  
19 395 the remaining controversy surrounding deprescribing of some of these medications (e.g.,  
20  
21 396 statins).  
22  
23  
24 397  
25  
26 398 Fear of and uncertainty about deprescribing due to unknown/possible negative consequences  
27  
28 399 was frequently mentioned as a barrier to deprescribing in the articles included in this systematic  
29  
30 400 review. Interestingly, while fear was as frequently reported as a barrier by patients/informal  
31  
32 401 caregivers than by HCPs, uncertainty was more frequently reported as a barrier by HCPs,  
33  
34 402 suggesting a different level of knowledge and feeling of responsibility between HCPs and  
35  
36 403 patients/informal caregivers. Such uncertainty was also reported in studies focusing on  
37  
38 404 deprescribing general medications in older, multimorbid adults, potentially because of the  
39  
40 405 complexity of interactions between diseases and the single-disease focused guidelines that  
41  
42 406 might not apply to patients with multimorbidity.<sup>(48-50)</sup> However, one of these studies stated that  
43  
44 407 balancing benefits and harms was particularly complicated for preventive medications.<sup>(48)</sup> Tools  
45  
46 408 to facilitate the deprescribing process and ensure safe CVM deprescribing could help to do so,  
47  
48 409 especially since HCPs in our review frequently reported the deprescribing process as a barrier.  
49  
50  
51 410  
52  
53  
54 411 While patient/informal caregiver and HCP points of view towards CVM deprescribing were  
55  
56 412 largely similar, we could highlight differences in the perceived benefit of CVMs in robust  
57  
58 413 versus frail patients. As shown in a study evaluating frail patient beliefs about prescribed  
59  
60

1  
2  
3 414 medications, most patients saw their medications as highly necessary.<sup>(51)</sup> However, over one-  
4  
5 415 third of patients included in this study stated that their medications were a mystery to them.<sup>(51)</sup>  
6  
7 416 This stresses the fact that patients might see a medication as necessary without being able to  
8  
9 417 understand its potential (lack of) benefit. HCPs, on the other hand, seemed to place importance  
10  
11 418 on their patients deriving benefits from their CVMs. Thus, they endorsed deprescribing in frail  
12  
13 419 patients due to a lack of time to benefit, but renounced deprescribing in robust patients. This  
14  
15 420 view is concordant with other studies on treating frail and/or robust patients.<sup>(9, 52)</sup> Other  
16  
17 421 differences between patients/informal caregivers and HCPs regarded ADE occurrence, that was  
18  
19 422 slightly more frequently cited as a facilitator in studies on patients/informal caregivers than on  
20  
21 423 HCPs, and dislike, which was a facilitator to deprescribing only mentioned by patients. These  
22  
23 424 divergent views emphasize the need for discussion between HCPs and patients/informal  
24  
25 425 caregivers about representations and beliefs, and how these might influence decision-making  
26  
27 426 about deprescribing. This is especially important for HCPs to consider, given how patients rely  
28  
29 427 on them for decision-making and might assume that they do not have to discuss their  
30  
31 428 preferences and beliefs as these are already clear for their HCPs.<sup>(53-55)</sup>  
32  
33  
34  
35  
36  
37  
38  
39

429

## 430 **5. Strengths and limitations**

431 This study has several strengths. First, data extraction, analysis and synthesis, as well as quality  
432 assessment were conducted by two independent reviewers on all available data based on a  
433 systematic review. Second, we included both quantitative and qualitative studies, providing  
434 complementary information on barriers and facilitators to deprescribing.

435 However, this study also has limitations. First, in some studies, CVMs were part of the  
436 evaluated medications but not the focus. However, this enabled inclusion of more studies and  
437 thus exploration of more barriers and facilitators to deprescribing CVMs. Second, as this review  
438 focused on CVMs in general, no conclusion can be made on individual CVMs. However,  
439 barriers and facilitators did not appear to differ significantly between studies

1  
2  
3 440 assessing/exploring different CVMs, which leads to thinking that most barriers and facilitators  
4  
5 441 might be common across CVMs. Third, the studies reporting HCP barriers and facilitators to  
6  
7 442 deprescribing CVMs encompass mostly GP barrier and facilitators, which may differ from  
8  
9 443 those of other healthcare providers.  
10  
11  
12 444

## 14 445 **6. Implications**

16 446 The identification of barriers and facilitators to deprescribing CVMs, and the quantification of  
17  
18 447 the reporting frequency at the patient, informal caregiver and HCP levels, have several  
19  
20 448 implications and call for future actions to address the current lack of evidence regarding  
21  
22 449 potential benefits and risks of some CVM deprescribing. First, differences in opinions between  
23  
24 450 patients and HCPs, such as CVM benefits and CVM dislike, stress the need for ground  
25  
26 451 discussions about beliefs and preferences about deprescribing of each stakeholder implicated  
27  
28 452 in the deprescribing decision. Second, the uncertainty about deprescribing CVMs that HCPs  
29  
30 453 frequently mentioned, HCP wish to account for patient preferences when approaching  
31  
32 454 deprescribing, and patients relying on HCPs for decision-making highlight the need to translate  
33  
34 455 a part of HCP responsibility in deprescribing to patients, so that decision-making can be shared  
35  
36 456 and jointly carried. To enable this, HCPs must be provided with tools that enable sharing the  
37  
38 457 risks and benefits of deprescribing with patients and ensure a safe deprescribing process.  
39  
40 458 Furthermore, HCPs should be trained on deprescribing processes and changes at the policy  
41  
42 459 making level should provide HCPs with sufficient time and adequate remuneration to approach  
43  
44 460 deprescribing with patients. Less time pressure would also enable patients to feel more  
45  
46 461 comfortable to address deprescribing with their HCPs.  
47  
48  
49  
50  
51  
52  
53  
54  
55  
56  
57  
58  
59  
60



## 466 7. Conclusion

467 In this systematic review, we provided an overview of barriers and facilitators to deprescribing  
468 CVMs, from the point of view of patients, informal caregivers and HCPs. The identification  
469 and quantification of barriers and facilitators most frequently cited by patients, informal  
470 caregivers and/or HCPs can help to develop future actions needed to improve evidence in CVM  
471 deprescribing and reduce the burden of medications for the patients.

## 473 8. Acknowledgments

474 The authors want to thank Judith Ellen Smith, Librarian at the University of Michigan (Ann  
475 Arbor, USA), who helped develop the search strategy, and Dr. Manuel Raphael Blum (Institute  
476 of Primary Health Care (BIHAM), University of Bern, Switzerland; Department of General  
477 Internal Medicine, Inselspital, Bern University Hospital, University of Bern, Switzerland), who  
478 critically revised the study protocol.

### 480 8.1. Financial and personal conflicts of interest:

481 The authors declare no conflict of interest.

### 483 8.2. Author contributions:

484 CEA, LB and NR designed the study protocol. CEA and LB extracted and analyzed the data.

485 CEA, LB and NR drafted the article. All authors gave final approval to submit the article.

### 487 8.3. Sponsors' role:

488 All authors were partly supported by the Swiss National Science Foundation Grant IICT  
489 33IC30-193052, and LB was supported by a grant from the College of General Internal  
490 Medicine. Both funding sources had no role in this study.

491

1  
2  
3 492 8.4. Data sharing statement:  
4

5 493 The coding of the articles is available by the authors on reasonable request.  
6  
7

8 494

9  
10 495 8.5. Funding:  
11

12 496 All authors were partly supported by the Schweizerischer Nationalfonds zur Förderung der  
13

14 497 Wissenschaftlichen Forschung IICT, Grant number 33IC30-193052 (PI Prof. Rodondi). LB and  
15

16 498 this study were supported by a grant from the College of General Internal Medicine (Fribourg,  
17

18 499 Switzerland) (No grant number).  
19  
20

21 500

22  
23  
24 501 8.6. Competing interests statement:  
25

26 502 Nothing to disclose.  
27

28 503

29  
30 504 **9. Ethics approval**  
31

32 505 An ethics approval was not needed for this study, since it was a review of the literature.  
33  
34

35 506  
36

37 507  
38

39 508  
40

41 509  
42

43 510  
44

45 511  
46

47 512  
48

49 513  
50

51 514  
52

53 515  
54

55 516  
56

57 517  
58  
59  
60

## 10. References

1. Krishnaswami A, Steinman MA, Goyal P, Zullo AR, Anderson TS, Birtcher KK, et al. Deprescribing in Older Adults With Cardiovascular Disease. *Journal of the American College of Cardiology*. 2019;73(20):2584-95.
2. Scott IA, Hilmer SN, Reeve E, Potter K, Le Couteur D, Rigby D, et al. Reducing inappropriate polypharmacy: the process of deprescribing. *JAMA Intern Med*. 2015;175(5):827-34.
3. Informatics IIfH. Global Medicines Use in 2020 2015 [Available from: <https://www.iqvia.com/-/media/iqvia/pdfs/institute-reports/global-medicines-use-in-2020>].
4. Goyal P, Requiño T, Siceloff B, Shen MJ, Masterson Creber R, Hilmer SN, et al. Patient-Reported Barriers and Facilitators to Deprescribing Cardiovascular Medications. *Drugs & aging*. 2020;37(2):125-35.
5. Budnitz DS, Lovegrove MC, Shehab N, Richards CL. Emergency hospitalizations for adverse drug events in older Americans. *The New England journal of medicine*. 2011;365(21):2002-12.
6. Akbulut M, Urun Y. Onco-cardiology: Drug-drug interactions of antineoplastic and cardiovascular drugs. *Crit Rev Oncol Hematol*. 2020;145:102822.
7. Rossello X, Pocock SJ, Julian DG. Long-Term Use of Cardiovascular Drugs: Challenges for Research and for Patient Care. *Journal of the American College of Cardiology*. 2015;66(11):1273-85.
8. Ridker PM, Danielson E, Fonseca FA, Genest J, Gotto AM, Jr., Kastelein JJ, et al. Rosuvastatin to prevent vascular events in men and women with elevated C-reactive protein. *The New England journal of medicine*. 2008;359(21):2195-207.
9. Kutner JS, Blatchford PJ, Taylor DH, Jr., Ritchie CS, Bull JH, Fairclough DL, et al. Safety and benefit of discontinuing statin therapy in the setting of advanced, life-limiting illness: a randomized clinical trial. *JAMA Intern Med*. 2015;175(5):691-700.
10. Moonen JE, Foster-Dingley JC, de Ruijter W, van der Grond J, de Craen AJ, van der Mast RC. Effect of discontinuation of antihypertensive medication on orthostatic hypotension in older persons with mild cognitive impairment: the DANTE Study Leiden. *Age and ageing*. 2016;45(2):249-55.
11. Williamson JD, Pajewski NM, Auchus AP, Bryan RN, Chelune G, Cheung AK, et al. Effect of Intensive vs Standard Blood Pressure Control on Probable Dementia: A Randomized Clinical Trial. *Jama*. 2019;321(6):553-61.
12. Linsky A, Meterko M, Bokhour BG, Stolzmann K, Simon SR. Deprescribing in the context of multiple providers: understanding patient preferences. *Am J Manag Care*. 2019;25(4):192-8.
13. Holmes HM, Todd A. The Role of Patient Preferences in Deprescribing. *Clin Geriatr Med*. 2017;33(2):165-75.
14. McCartney M, Treadwell J, Maskrey N, Lehman R. Making evidence based medicine work for individual patients. *Bmj*. 2016;353:i2452.
15. Weir K, Nickel B, Naganathan V, Bonner C, McCaffery K, Carter SM, et al. Decision-Making Preferences and Deprescribing: Perspectives of Older Adults and Companions About Their Medicines. *The journals of gerontology Series B, Psychological sciences and social sciences*. 2018;73(7):e98-e107.
16. Woodward MC. Deprescribing: Achieving Better Health Outcomes for Older People Through Reducing Medications. *Journal of Pharmacy Practice and Research*. 2003;33(4):323-8.
17. Vaismoradi M, Turunen H, Bondas T. Content analysis and thematic analysis: Implications for conducting a qualitative descriptive study. *Nurs Health Sci*. 2013;15(3):398-405.
18. Burnard P, Gill P, Stewart K, Treasure E, Chadwick B. Analysing and presenting qualitative data. *Br Dent J*. 2008;204(8):429-32.
19. Reeve E, To J, Hendrix I, Shakib S, Roberts MS, Wiese MD. Patient barriers to and enablers of deprescribing: A systematic review. *Drugs and Aging*. 2013;30(10):793-807.

- 1  
2  
3 572 20. Hong QN, Gonzalez-Reyes A, Pluye P. Improving the usefulness of a tool for  
4 573 appraising the quality of qualitative, quantitative and mixed methods studies, the Mixed  
5 574 Methods Appraisal Tool (MMAT). *J Eval Clin Pract*. 2018;24(3):459-67.
- 6 575 21. Hong QN, Pluye P, Fàbregues S, Bartlett G, Boardman F, Cargo M, et al. Improving  
7 576 the content validity of the mixed methods appraisal tool: a modified e-Delphi study. *J Clin  
8 577 Epidemiol*. 2019;111:49-59.e1.
- 9 578 22. Benson J, Britten N. What effects do patients feel from their antihypertensive tablets  
10 579 and how do they react to them? Qualitative analysis of interviews with patients. *Family  
11 580 Practice*. 2006;23(1):80-7.
- 12 581 23. Brinton EA. Understanding Patient Adherence and Concerns with Statins and  
13 582 Medication Discussions With Physicians (ACTION): A survey on the patient perspective of  
14 583 dialogue with healthcare providers regarding statin therapy. *Clinical cardiology*.  
15 584 2018;41(6):710-20.
- 16 585 24. Crutzen S, Baas G, Abou J, van den Born-Bondt T, Hugtenburg JG, Bouvy ML, et al.  
17 586 Barriers and Enablers of Older Patients to Deprescribing of Cardiometabolic Medication: A  
18 587 Focus Group Study. *Frontiers in pharmacology*. 2020;11:1268.
- 19 588 25. Jansen J, McKinn S, Bonner C, Muscat DM, Doust J, McCaffery K. Shared decision-  
20 589 making about cardiovascular disease medication in older people: a qualitative study of  
21 590 patient experiences in general practice. *BMJ open*. 2019;9(3):e026342.
- 22 591 26. Luymes CH, Boelhouwer NJ, Poortvliet RK, de Ruijter W, Reis R, Numans ME.  
23 592 Understanding deprescribing of preventive cardiovascular medication: a Q-methodology  
24 593 study in patients. *Patient Prefer Adherence*. 2017;11:975-84.
- 25 594 27. Pickering AN, Hamm ME, Dawdani A, Hanlon JT, Thorpe CT, Gellad WF, et al. Older  
26 595 Patient and Caregiver Perspectives on Medication Value and Deprescribing: A Qualitative  
27 596 Study. *J Am Geriatr Soc*. 2020;68(4):746-53.
- 28 597 28. Qi K, Reeve E, Hilmer SN, Pearson S-A, Matthews S, Gnjidic D. Older peoples'  
29 598 attitudes regarding polypharmacy, statin use and willingness to have statins deprescribed in  
30 599 Australia. *International journal of clinical pharmacy*. 2015;37(5):949-57.
- 31 600 29. Tjia J, Kutner JS, Ritchie CS, Blatchford PJ, Bennett Kendrick RE, Prince-Paul M, et  
32 601 al. Perceptions of Statin Discontinuation among Patients with Life-Limiting Illness. *Journal of  
33 602 palliative medicine*. 2017;20(10):1098-103.
- 34 603 30. van Bussel E, Reurich L, Pols J, Richard E, Moll van Charante E, Ligthart S.  
35 604 Hypertension management: experiences, wishes and concerns among older people-a  
36 605 qualitative study. *BMJ open*. 2019;9(8):e030742.
- 37 606 31. Ailabouni NJ, Nishtala PS, Mangin D, Tordoff JM. Challenges and Enablers of  
38 607 Deprescribing: A General Practitioner Perspective. *PloS one*. 2016;11(4):e0151066.
- 39 608 32. Ailabouni NJ, Nishtala PS, Mangin D, Tordoff JM. General practitioners' insight into  
40 609 deprescribing for the multimorbid older individual: a qualitative study. *Int J Clin Pract*.  
41 610 2016;70(3):261-76.
- 42 611 33. Anderson K, Foster M, Freeman C, Luetsch K, Scott I. Negotiating "Unmeasurable  
43 612 Harm and Benefit": Perspectives of General Practitioners and Consultant Pharmacists on  
44 613 Deprescribing in the Primary Care Setting. *Qual Health Res*. 2017;27(13):1936-47.
- 45 614 34. Geijteman ECT, Huisman BAA, Dees MK, Perez RSGM, Van Der Rijt CCD, Van  
46 615 Zuylen L, et al. Medication Discontinuation at the End of Life: A Questionnaire Study on  
47 616 Physicians' Experiences and Opinions. *Journal of Palliative Medicine*. 2018;21(8):1166-70.
- 48 617 35. Goyal P, Anderson TS, Bernacki GM, Marcum ZA, Orkaby AR, Kim D, et al. Physician  
49 618 Perspectives on Deprescribing Cardiovascular Medications for Older Adults. *Journal of the  
50 619 American Geriatrics Society*. 2020;68(1):78-86.
- 51 620 36. Green AR, Lee P, Reeve E, Wolff JL, Chen CCG, Kruzan R, et al. Clinicians'  
52 621 Perspectives on Barriers and Enablers of Optimal Prescribing in Patients with Dementia and  
53 622 Coexisting Conditions. *Journal of the American Board of Family Medicine : JABFM*.  
54 623 2019;32(3):383-91.
- 55 624 37. Jansen J, McKinn S, Bonner C, Irwig L, Doust J, Glasziou P, et al. General  
56 625 Practitioners' Decision Making about Primary Prevention of Cardiovascular Disease in Older  
57 626 Adults: A Qualitative Study. *PloS one*. 2017;12(1):e0170228.

- 1  
2  
3 627 38. Thompson W, Le JV, Haastrup P, Nielsen JB, Pedersen LB, Jarbøl DE. Exploring  
4 628 how GPs discuss statin deprescribing with older people: A qualitative study. *BJGP Open*.  
5 629 2020;4(1).  
6 630 39. van Middelaar T, Ivens SD, van Peet PG, Poortvliet RKE, Richard E, Pols AJ, et al.  
7 631 Prescribing and deprescribing antihypertensive medication in older people by Dutch general  
8 632 practitioners: a qualitative study. *BMJ Open*. 2018;8(4):e020871.  
9 633 40. van der Ploeg MA, Streit S, Achterberg WP, Beers E, Bohnen AM, Burman RA, et al.  
10 634 Patient Characteristics and General Practitioners' Advice to Stop Statins in Oldest-Old  
11 635 Patients: a Survey Study Across 30 Countries. *Journal of general internal medicine*.  
12 636 2019;34(9):1751-7.  
13 637 41. Luymes CH, van der Kleij RMJJ, Poortvliet RKE, de Ruijter W, Reis R, Numans ME.  
14 638 Deprescribing Potentially Inappropriate Preventive Cardiovascular Medication: Barriers and  
15 639 Enablers for Patients and General Practitioners. *The Annals of pharmacotherapy*.  
16 640 2016;50(6):446-54.  
17 641 42. Todd A, Holmes H, Pearson S, Hughes C, Andrew I, Baker L, et al. 'I don't think I'd be  
18 642 frightened if the statins went': A phenomenological qualitative study exploring medicines use  
19 643 in palliative care patients, carers and healthcare professionals. *BMC Palliative Care*.  
20 644 2016;15(1).  
21 645 43. Anderson K, Stowasser D, Freeman C, Scott I. Prescriber barriers and enablers to  
22 646 minimising potentially inappropriate medications in adults: a systematic review and thematic  
23 647 synthesis. *BMJ open*. 2014;4(12):e006544.  
24 648 44. Cook JM, Marshall R, Masci C, Coyne JC. Physicians' perspectives on prescribing  
25 649 benzodiazepines for older adults: a qualitative study. *Journal of general internal medicine*.  
26 650 2007;22(3):303-7.  
27 651 45. Zechmann S, Trueb C, Valeri F, Streit S, Senn O, Neuner-Jehle S. Barriers and  
28 652 enablers for deprescribing among older, multimorbid patients with polypharmacy: an  
29 653 explorative study from Switzerland. *BMC Fam Pract*. 2019;20(1):64.  
30 654 46. Kuntz J, Kouch L, Christian D, Peterson PL, Gruss I. Barriers and Facilitators to the  
31 655 Deprescribing of Nonbenzodiazepine Sedative Medications Among Older Adults. *Perm J*.  
32 656 2018;22:17-157.  
33 657 47. Paque K, Vander Stichele R, Elseviers M, Pardon K, Dilles T, Deliens L, et al. Barriers  
34 658 and enablers to deprescribing in people with a life-limiting disease: A systematic review.  
35 659 *Palliat Med*. 2019;33(1):37-48.  
36 660 48. Bokhof B, Junius-Walker U. Reducing Polypharmacy from the Perspectives of  
37 661 General Practitioners and Older Patients: A Synthesis of Qualitative Studies. *Drugs & aging*.  
38 662 2016;33(4):249-66.  
39 663 49. Rieckert A, Sommerauer C, Krumeich A, Sönnichsen A. Reduction of inappropriate  
40 664 medication in older populations by electronic decision support (the PRIMA-eDS study): a  
41 665 qualitative study of practical implementation in primary care. *BMC Fam Pract*.  
42 666 2018;19(1):110.  
43 667 50. Schuling J, Gebben H, Veehof LJ, Haaijer-Ruskamp FM. Deprescribing medication in  
44 668 very elderly patients with multimorbidity: the view of Dutch GPs. A qualitative study. *BMC*  
45 669 *Fam Pract*. 2012;13:56.  
46 670 51. Modig S, Kristensson J, Ekwall AK, Hallberg IR, Midlöv P. Frail elderly patients in  
47 671 primary care--their medication knowledge and beliefs about prescribed medicines. *Eur J Clin*  
48 672 *Pharmacol*. 2009;65(2):151-5.  
49 673 52. Benetos A, Rossignol P, Cherubini A, Joly L, Grodzicki T, Rajkumar C, et al.  
50 674 Polypharmacy in the Aging Patient: Management of Hypertension in Octogenarians. *Jama*.  
51 675 2015;314(2):170-80.  
52 676 53. Morecroft C, Cantrill J, Tully MP. Patients' evaluation of the appropriateness of their  
53 677 hypertension management--a qualitative study. *Research in social & administrative*  
54 678 *pharmacy : RSAP*. 2006;2(2):186-211.  
55 679 54. Morecroft C, Cantrill J, Tully MP. Individual patient's preferences for hypertension  
56 680 management: a Q-methodological approach. *Patient Educ Couns*. 2006;61(3):354-62.  
57 681 55. Bynum JP, Barre L, Reed C, Passow H. Participation of very old adults in health care  
58 682 decisions. *Med Decis Making*. 2014;34(2):216-30.

1  
2  
3  
4  
5  
6  
7  
8  
9  
10  
11  
12  
13  
14  
15  
16  
17  
18  
19  
20  
21  
22  
23  
24  
25  
26  
27  
28  
29  
30  
31  
32  
33  
34  
35  
36  
37  
38  
39  
40  
41  
42  
43  
44  
45  
46  
47  
48  
49  
50  
51  
52  
53  
54  
55  
56  
57  
58  
59  
60

683 **FIGURE LEGEND:**

684 **Figure 1: Study selection results**

685 **Abbreviations:** CVM: cardiovascular medication; HCP: healthcare providers

For peer review only

## 11. Supplemental material

The detailed search strategy, the detailed study characteristics, and the study quality appraisal are presented in the supplemental material section.

For peer review only

**Figure 1: Study selection results**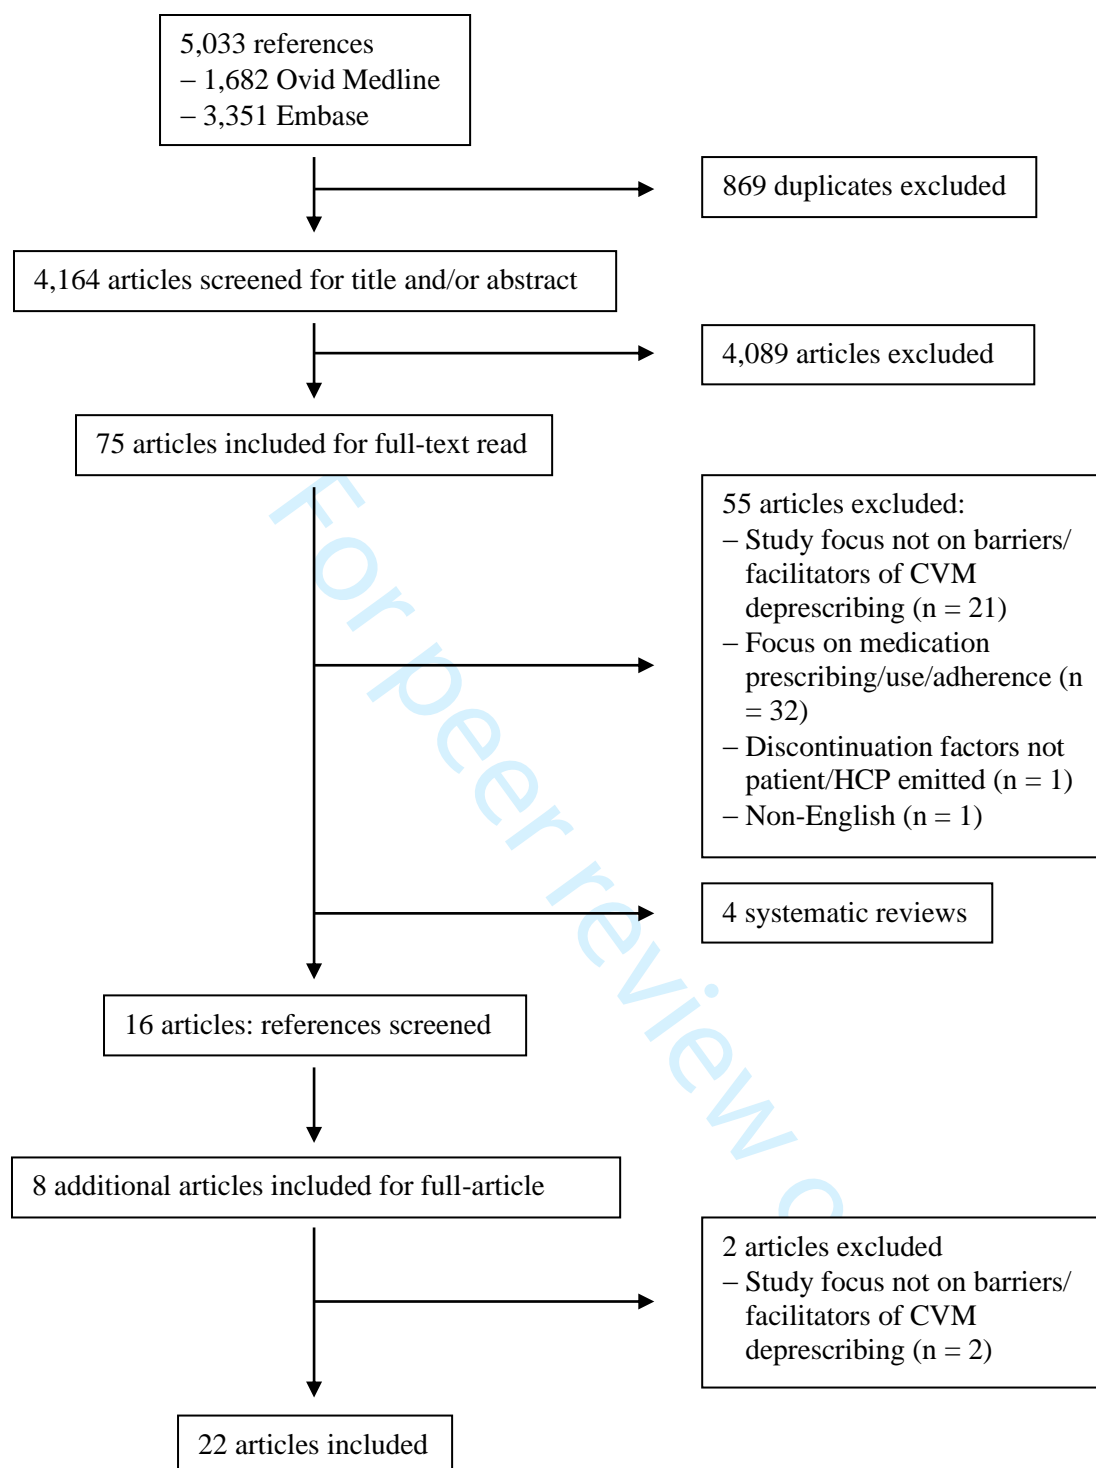

**Legend:** CVM: cardiovascular medication; HCP: healthcare providers



1 **Supplemental Material S1: Search strategy barriers and facilitators to deprescribing cardiovascular**  
 2 **medications**

3  
 4 **OVID/MEDLINE 2021.11.15: 1,682 results**

5  
 6 Concept 1: cardiovascular medications

- 7 1. exp cardiovascular agents/  
 8 2. exp Hydroxymethylglutaryl-CoA Reductase Inhibitors/  
 9 3. ("hmg coa reductase inhibitors" or "hmg-coa reductase inhibitors" or "hydroxymethylglutaryl coa reductase  
 10 inhibitors" or "hydroxymethylglutaryl-coa inhibitors" or "hydroxymethylglutaryl-coa reductase inhibitors" or  
 11 "hydroxymethylglutaryl-coenzyme a inhibitors" or "inhibitors, hmg coa reductase" or "inhibitors, hmg-coa  
 12 reductase" or "inhibitors, hydroxymethylglutaryl coa" or "inhibitors, hydroxymethylglutaryl coenzyme a" or  
 13 "inhibitors, hydroxymethylglutaryl-coa" or "inhibitors, hydroxymethylglutaryl-coa reductase" or "inhibitors,  
 14 hydroxymethylglutaryl-coenzyme a" or "reductase inhibitors, hmg-coa" or "reductase inhibitors,  
 15 hydroxymethylglutaryl-coa" or "hmg-coa statins" or statins or "statins, hmg coa" or "statins, hmg-coa" or  
 16 "Cardiovascular medic\*" or "cardiovascular drug\*" or "cardiovascular preparation\*" or "cardiovascular medic\*" OR  
 17 "cardiovascular prescri\*" or "cardiovascular therapeutic\*" or "cardiovascular treat\*" or "cardiometabolic  
 18 medic\*" or "cardiometabolic drug\*" or "cardiometabolic agent\*" or "cardiometabolic preparation\*" or  
 19 "cardiometabolic prescri\*" or "cardiometabolic therapeutic\*" or "cardiometabolic treat\*" or "lipid-lowering  
 20 treat\*" or "lipid-lowering medic\*" or "lipid-lowering drug\*" or "lipid-lowering agent\*" or "lipid-lowering  
 21 preparation\*" or "lipid-lowering prescri\*" or "lipid-lowering therapeutic\*").ab,ti.  
 22 4. "cardiovascular disease".ab,ti.  
 23 5. \*cardiovascular diseases/  
 24 6. prevention.ab,ti.  
 25 7. \*primary prevention/  
 26 8. \*secondary prevention/  
 27 9. 4 or 5  
 28 10. 6 or 7 or 8  
 29 11. 9 and 10

30 Concept 2: prescribing / deprescribing

- 31 12. exp Deprescriptions/  
 32 13. exp Withholding Treatment/  
 33 14. exp Potentially Inappropriate Medication List/  
 34 15. exp Inappropriate Prescribing/  
 35 16. (reduce or reducing or reduction or reduced or withdraw\* or withhold\* or stop or stopped or stopping or  
 36 elimin\* or tapering or taper or cease or ceasing or ceased or cessation\* or de-intensif\* or deintensif\* or  
 37 deprescribing or deprescri\* or "de-prescribing" or "de-prescrib\*" or "de-implementation\*" or "de-implement\*" or  
 38 deimplement\* or discontinue\* or discontinuation\* or curb or curbing or curbed).ab,ti.

39 Concept 3: barriers and facilitators

- 40 17. \*patient acceptance of health care/  
 41 18. \*patient preference/  
 42 19. \*attitude to health/  
 43 20. \*physician-patient relations/  
 44 21. (barriers or barrier or issues or issue or problems or problem or hinder or hindered or hinders or facilitate or  
 45 facilitates or facilitated or facilitator or facilitators or ease or easy or easier or difficult or difficulty or  
 46 willingness or belief or believe\* or preference\* or willing or dialog\* or conversation\* or decision or decide\* or  
 47 deciding or motivation or conversation or acceptance or acceptability).ti.  
 48 22. (perceptions or perception or behaviors or behavior or behaviour or behaviours or attitudes or attitude or  
 49 input or inputs or experience or experiences or value or values or perspective\* or expectation\* or choice or  
 50 choices or empower\* or choose\* or choosing or acceptance or acceptability or knowledge\* or preference\* or  
 51 motivation\* or intention\* or involv\* or engag\* or consult\* or interact\* or involv\* or satisfaction or satisfied or  
 52 discuss\* or discussion\*).ti.  
 53 23. (GP\* or pharmacist\* or physician\* or provider\* or patient\* or "general practitioner\*" or patient\* or adult\* or  
 54 relative\* or caregiver\*).ti.  
 55 24. 22 and 23  
 56 25. 1 or 2 or 3 or 11  
 57 26. 12 or 13 or 14 or 15 or 16  
 58 27. 17 or 18 or 19 or 20 or 21 or 24  
 59 28. 25 and 26 and 27  
 60 29. limit 28 to (English language and yr="2003-Current")  
 30. (child or kid or kids or childhood or children or pediatric or paediatric or pediatrics or paediatrics or mouse  
 or mice or animals or animal).ab,ti.  
 31. 29 not 30

EMBASE 2021.11.15: 3,351 results

Concept 1: cardiovascular medications

1. 'cardiovascular agent'/exp
2. 'hydroxymethylglutaryl coenzyme A reductase inhibitor'/exp
3. ("hmg coa reductase inhibitors" or "hmg-coa reductase inhibitors" or "hydroxymethylglutaryl coa reductase inhibitors" or "hydroxymethylglutaryl-coa inhibitors" or "hydroxymethylglutaryl-coa reductase inhibitors" or "hydroxymethylglutaryl-coenzyme a inhibitors" or "inhibitors, hmg coa reductase" or "inhibitors, hmg-coa reductase" or "inhibitors, hydroxymethylglutaryl coa" or "inhibitors, hydroxymethylglutaryl coenzyme a" or "inhibitors, hydroxymethylglutaryl-coa" or "inhibitors, hydroxymethylglutaryl-coa reductase" or "inhibitors, hydroxymethylglutaryl-coenzyme a" or "reductase inhibitors, hmg-coa" or "reductase inhibitors, hydroxymethylglutaryl-coa" or "hmg-coa statins" or statins or "statins, hmg coa" or "statins, hmg-coa" or "Cardiovascular medic\*" or "cardiovascular drug\*" or "cardiovascular preparation\*" or "cardiovascular medic\*" OR "cardiovascular prescri\*" or "cardiovascular therapeutic\*" or "cardiovascular treat\*" or "cardiomatabolic medic\*" or "cardiomatabolic drug\*" or "cardiomatabolic agent\*" or "cardiomatabolic preparation\*" or "cardiomatabolic prescri\*" or "cardiomatabolic therapeutic\*" or "cardiomatabolic treat\*" or "lipid-lowering treat\*" or "lipid-lowering medic\*" or "lipid-lowering drug\*" or "lipid-lowering agent\*" or "lipid-lowering preparation\*" or "lipid-lowering prescri\*" or "lipid-lowering therapeutic\*"):ab,ti
4. "cardiovascular disease":ab,ti
5. 'cardiovascular diseases'/mj
6. prevention:ab,ti
7. 'primary prevention'/mj
8. 'secondary prevention'/mj
9. 4 or 5
10. 6 or 7 or 8
11. 9 and 10

Concept 2: prescribing / deprescribing

12. 'deprescription'/mj
13. 'treatment withdrawal'/mj
14. 'potentially inappropriate medication'/mj
15. 'inappropriate prescribing'/mj
16. (reduce or reducing or reduction or reduced or withdraw\* or withhold\* or stop or stopped or stopping or elimin\* or tapering or taper or cease or ceasing or ceased or cessation\* or de-intensif\* or deintensif\* or deprescribing or deprescri\* or "de-prescribing" or "de-prescrib\*" or "de-implementation\*" or "de-implement\*" or deimplement\* or discontinue\* or discontinuation\* or curb or curbing or curbed):ab,ti

Concept 3: barriers and facilitators

17. 'patient attitude'/mj
18. 'patient preference'/mj
19. 'attitude to health'/mj
20. 'doctor patient relationship'/mj
21. (barriers or barrier or issues or problem or problems or problem or hinder or hindered or hinders or facilitate or facilitates or facilitated or facilitator or facilitators or ease or easy or easier or difficult or difficulty or willingness or belief or believe\* or preference\* or willing or dialog\* or conversation\* or decision or decide\* or deciding or motivation or conversation or acceptance or acceptability):ti
22. (perceptions or perception or behaviors or behavior or behaviour or behaviours or attitudes or attitude or input or inputs or experience or experiences or value or values or perspective\* or expectation\* or choice or choices or empower\* or choose\* or choosing or acceptance or acceptability or knowledge\* or preference\* or motivation\* or intention\* or involv\* or engag\* or consult\* or interact\* or involv\* or satisfaction or satisfied or discuss\* or discussion\*):ti
23. (GP\* or pharmacist\* or physician\* or provider\* or patient\* or "general practitioner\*" or patient\* or adult\* or relative\* or caregiver\*):ti
24. #22 AND #23
25. #1 OR #2 OR #3 OR #11
26. #12 OR #13 OR #14 OR #15 OR #16
27. #17 OR #18 OR #19 OR #20 OR #21 OR #24
28. #25 AND #26 AND #27
29. (child or kid or kids or childhood or children or pediatric or paediatric or pediatrics or paediatrics or mouse or mice or animals or animal):ti,ab
30. #25 AND #26 AND #27 NOT #29 AND ([article]/lim OR [review]/lim) AND [english]/lim AND ([embase]/lim OR [embase classic]/lim OR [pubmed-not-medicine]/lim) AND [2003-2020]/py

## Supplemental Material S2: study characteristics

| First author                | Setting                                                                                  | Design                   | Data collection mean         | N population                 | Age                                                                                     | No of medication taken                                                                                               | Studied CVM(s)                                                                     | Prevention type     | Life-limiting disease |
|-----------------------------|------------------------------------------------------------------------------------------|--------------------------|------------------------------|------------------------------|-----------------------------------------------------------------------------------------|----------------------------------------------------------------------------------------------------------------------|------------------------------------------------------------------------------------|---------------------|-----------------------|
| Benson, 2005 (UK)           | Primary care                                                                             | Qualitative              | Interviews                   | 38 patients                  | 18% <50 years<br>16% 50-59 years<br>29% 60-69 years<br>24% 70-79 years<br>13% ≥80 years | Antihypertensives:<br>50%: 1; 39%: 2; 11%: ≥3<br>Non-antihypertensives:<br>34%: 0; 18%: 2, 13%: 3;<br>11%: 4; 8%: ≥5 | Antihypertensives                                                                  | Unknown             | No                    |
| Brinton, 2018 (USA)         | Online panels                                                                            | Quantitative descriptive | Survey                       | 5014 patients                | Mean age: 64                                                                            | 99% of current statin users taking a mean of 7.7 meds                                                                | Statin                                                                             | Primary & secondary | No                    |
| Crutzen, 2020 (Netherlands) | Primary care                                                                             | Qualitative              | FGs                          | 17 patients<br>1 caregiver   | Median age:<br>FG1: 78<br>FG2: 77.5                                                     | FG1: 6: 5-10; 2: >10<br>FG2: 4: 5-10; 5: >10                                                                         | Cardiometabolic medication                                                         | Primary & secondary | No                    |
| Goyal, 2020 (USA)           | Quaternary care                                                                          | Qualitative              | Interviews                   | 10 patients                  | Median age: 80                                                                          | Median of 12                                                                                                         | β-blockers                                                                         | Primary & secondary | No                    |
| Jansen, 2019 (Australia)    | Primary care                                                                             | Qualitative              | Interviews                   | 30 patients                  | 20: 75-79 years<br>4: 80-84 years<br>5: 85-89 years<br>1: ≥90 years                     | Unknown                                                                                                              | Preventive CV medication                                                           | Primary & secondary | No                    |
| Luymes, 2017 (Netherlands)  | Primary care                                                                             | Mixed methods            | Q-sorts<br>Group discussions | 33 patients                  | Mean age:<br>- Q-Sort: 57.1<br>- Discussion: 57.7                                       | Unknown                                                                                                              | LLTs<br>Antihypertensives                                                          | Primary             | No                    |
| Pickering, 2020 (USA)       | Claude D. Pepper Older Americans Independence Center Research Registry; Pitt+Me registry | Qualitative              | FGs                          | 16 patients<br>17 caregivers | Patients ≥ 65<br>Caregivers 22-69                                                       | ≥ 5 prescribed                                                                                                       | Unspecified (identified: antihypertensives, statins, antiplatelets, antidiabetics) | Primary & secondary | No                    |
| Qi, 2015 (Australia)        | Tertiary care                                                                            | Quantitative descriptive | Survey                       | 180 patients                 | Median age: 78                                                                          | Median of 8                                                                                                          | Regular medications<br>Statins                                                     | Primary & secondary | No                    |
| Tija, 2017 (USA)            | PCRC member sites                                                                        | Quantitative descriptive | Survey                       | 297 patients                 | Mean age: 71.8                                                                          | Mean of 11.5                                                                                                         | Statin                                                                             | Primary & secondary | Yes                   |

1  
2  
3  
4  
5  
6  
7  
8  
9  
10  
11  
12  
13  
14  
15  
16  
17  
18  
19  
20  
21  
22  
23  
24  
25  
26  
27  
28  
29  
30  
31  
32  
33  
34  
35  
36  
37  
38  
39  
40  
41  
42  
43  
44  
45  
46

|                                |              |             |            |             |              |                                                |                   |         |    |
|--------------------------------|--------------|-------------|------------|-------------|--------------|------------------------------------------------|-------------------|---------|----|
| Van Bussel, 2019 (Netherlands) | Primary care | Qualitative | Interviews | 15 patients | Mean age: 81 | Median of 4 with median of 2 antihypertensives | Antihypertensives | Primary | No |
|--------------------------------|--------------|-------------|------------|-------------|--------------|------------------------------------------------|-------------------|---------|----|

| First author                  | Setting                     | Design                   | Data collection mean | N population                                                                                                          | Years of experiences                                                     | HCPs' patients' characteristics |                        |                                                                           |                 |                       |
|-------------------------------|-----------------------------|--------------------------|----------------------|-----------------------------------------------------------------------------------------------------------------------|--------------------------------------------------------------------------|---------------------------------|------------------------|---------------------------------------------------------------------------|-----------------|-----------------------|
|                               |                             |                          |                      |                                                                                                                       |                                                                          | Age                             | No of medication taken | Studied CVM(s)                                                            | Prevention type | Life-limiting disease |
| Ailabouni, 2016 (New Zealand) | Primary care                | Qualitative              | Interviews           | 10 GPs                                                                                                                | Unknown                                                                  | 83                              | 17                     | Antiplatelets, statin, antidiabetics, diuretics, β-blocker, ACE inhibitor | Secondary       | No                    |
| Ailabouni, 2016 (New Zealand) | Primary care                | Qualitative              | Interviews           | 10 GPs                                                                                                                | 2-32                                                                     | Unspecified (older patients)    | Unknown                | Unspecified (statin and aspirin mentioned)                                | Unknown         | No                    |
| Anderson, 2017 (Australia)    | Primary care                | Qualitative              | FGs                  | 32 GPs<br>15 CPs                                                                                                      | GPs: median of 18<br>CP: median of 9                                     | Unknown                         | Unknown                | Unspecified (statin mentioned)                                            | Unknown         | No                    |
| Geijteman, 2018 (Netherlands) | Primary & secondary care    | Quantitative descriptive | Survey               | 174 GPs<br>147 clinical specialists (medical oncologists, geriatricians, cardiologists, pulmonologists, neurologists) | 203: 0-9 years<br>56: 10-19 years<br>40: 20-29 years<br>18: ≥ 30 years   | 88                              | 10                     | ACE inhibitor, statin, anticoagulant, diuretic, antidiabetic              | Secondary       | Yes                   |
| Goyal, 2020 (USA)             | Secondary and tertiary care | Quantitative descriptive | Survey               | 184 geriatricians<br>182 general internists<br>87 cardiologists                                                       | 86: 1-10 years<br>99: 11-20 years<br>138: 21-30 years<br>130: > 30 years | 79                              | Unspecified (several)  | 4 CV medications                                                          | Unknown         | Yes and no            |

1  
2

|    |                                    |                          |                          |                                        |                                                                                                                          |                                                                     |                                        |                                |                                                                     |                        |                              |
|----|------------------------------------|--------------------------|--------------------------|----------------------------------------|--------------------------------------------------------------------------------------------------------------------------|---------------------------------------------------------------------|----------------------------------------|--------------------------------|---------------------------------------------------------------------|------------------------|------------------------------|
| 3  | Green, 2019 (USA)                  | Primary & secondary care | Qualitative              | Interviews                             | 19 physicians<br>2 nurse practitioners (family, internal & geriatric medicine, urogynecology, endocrinology, cardiology) | Mean of 14                                                          | Unspecified (older patients)           | Unknown                        | Unspecified (oral anticoagulants, antidiabetics, statins mentioned) | Unknown                | Yes                          |
| 4  | Jansen, 2017 (Australia)           | Primary care             | Qualitative              | Interviews                             | 25 GPs                                                                                                                   | 2: < 10 years<br>4: 10-19 years<br>7: 20-29 years<br>12: ≥ 30 years | ≥75                                    | Unknown                        | Preventive CV medication                                            | Primary                | No                           |
| 5  | Thompson, 2020 (Denmark)           | Primary care             | Qualitative              | Interviews                             | 11 GPs                                                                                                                   | Mean of 9                                                           | ≥ 80                                   | Unknown                        | Statin                                                              | Unknown                | Yes and no                   |
| 6  | Van Middelaar, 2020 (Netherlands)  | Primary care             | Qualitative              | Interviews                             | 15 GPs                                                                                                                   | 4: 0-5 years<br>3: 5-10 years<br>3: 10-15 years<br>5: > 15 years    | Unspecified (older patients)           | Unknown                        | Antihypertensives                                                   | Unknown                | Yes and no                   |
| 7  | Van der Ploeg, 2018 (30 countries) | Primary care             | Quantitative descriptive | Survey                                 | 2250 GPs                                                                                                                 | 358: < 5 years<br>1024: 5-20 years<br>865: > 20 years               | ≥ 80                                   | Unknown                        | Statin                                                              | Primary and secondary  | Yes and no                   |
| 8  | <b>First author</b>                | <b>Setting</b>           | <b>Design</b>            | <b>Data collection mean</b>            | <b>N population</b>                                                                                                      | <b>Years of experiences</b>                                         | <b>HCPs' patients' characteristics</b> |                                |                                                                     |                        |                              |
| 9  |                                    |                          |                          |                                        |                                                                                                                          |                                                                     | <b>Age</b>                             | <b>No of medication taken</b>  | <b>Studied CVM(s)</b>                                               | <b>Prevention type</b> | <b>Life-limiting disease</b> |
| 10 | Luymes, 2016 (Netherlands)         | Primary care             | Qualitative              | Audiotaped deprescribing consultations | 10 GPs<br>49 patients                                                                                                    | Unknown                                                             | Median of 55.4                         | 27: < 2 kinds<br>22: ≥ 2 kinds | Antihypertensives, LLTs                                             | Primary                | No                           |

PATIENTS, INFORMAL

34  
35  
36  
37  
38  
39  
40  
41  
42  
43  
44  
45  
46

1  
2  
3  
4  
5  
6  
7  
8  
9  
10

|                 |                                                     |             |            |                                                                                                     |         |                                                        |         |                                                                            |         |     |
|-----------------|-----------------------------------------------------|-------------|------------|-----------------------------------------------------------------------------------------------------|---------|--------------------------------------------------------|---------|----------------------------------------------------------------------------|---------|-----|
| Todd, 2016 (UK) | Specialist palliative care unit at a daycare centre | Qualitative | Interviews | 12 patients<br>12 informal caregivers<br>3 palliative consultants<br>3 nurse practitioners<br>6 GPs | Unknown | 1: < 50<br>3: 51-60<br>3: 61-70<br>3: 71-79<br>2: ≥ 80 | Unknown | Unspecified (preventive medications, including statins, antihypertensives) | Unknown | Yes |
|-----------------|-----------------------------------------------------|-------------|------------|-----------------------------------------------------------------------------------------------------|---------|--------------------------------------------------------|---------|----------------------------------------------------------------------------|---------|-----|

For Peer review only

**Legend:** CPs: community pharmacists; CV: cardiovascular; CVM: cardiovascular medications; FGs: focus groups; GPs: general practitioners; HCPs: healthcare providers; LLTs: lipid-lowering therapies; PCRC: Palliative Care Research Cooperation Group

11  
12  
13  
14  
15  
16  
17  
18  
19  
20  
21  
22  
23  
24  
25  
26  
27  
28  
29  
30  
31  
32  
33  
34  
35  
36  
37  
38  
39  
40  
41  
42  
43  
44  
45  
46

## Supplemental Material S3: Details of study quality appraisal

|                          | Authors          | Is the qualitative approach appropriate to answer the research question? | Are the qualitative data collection methods adequate to address the research question? | Are the findings adequately derived from the data? | Is the interpretation of results sufficiently substantiated by data? | Is there coherence between qualitative data sources, collection, analysis and interpretation? |
|--------------------------|------------------|--------------------------------------------------------------------------|----------------------------------------------------------------------------------------|----------------------------------------------------|----------------------------------------------------------------------|-----------------------------------------------------------------------------------------------|
| QUALITATIVE              | Ailabouni, 2016  | Can't tell                                                               | Yes                                                                                    | Yes                                                | Can't tell                                                           | Yes                                                                                           |
|                          | Ailabouni, 2016  | Yes                                                                      | Yes                                                                                    | Yes                                                | Yes                                                                  | Yes                                                                                           |
|                          | Anderson, 2017   | Yes                                                                      | Yes                                                                                    | Yes                                                | Yes                                                                  | Yes                                                                                           |
|                          | Benson, 2005     | Yes                                                                      | Yes                                                                                    | Yes                                                | Yes                                                                  | Yes                                                                                           |
|                          | Crutzen, 2020    | Yes                                                                      | Yes                                                                                    | Yes                                                | Yes                                                                  | Yes                                                                                           |
|                          | Goyal, 2020      | Yes                                                                      | Yes                                                                                    | Yes                                                | Yes                                                                  | Yes                                                                                           |
|                          | Green, 2019      | Yes                                                                      | Yes                                                                                    | Yes                                                | Yes                                                                  | Yes                                                                                           |
|                          | Jansen, 2017     | Yes                                                                      | Yes                                                                                    | Yes                                                | Yes                                                                  | Yes                                                                                           |
|                          | Jansen, 2019     | Yes                                                                      | Yes                                                                                    | Yes                                                | Yes                                                                  | Yes                                                                                           |
|                          | Luymes, 2016     | Yes                                                                      | Yes                                                                                    | Yes                                                | Yes                                                                  | Yes                                                                                           |
|                          | Pickering, 2020  | Yes                                                                      | Yes                                                                                    | Yes                                                | Yes                                                                  | Yes                                                                                           |
|                          | Thompson 2019    | Yes                                                                      | Yes                                                                                    | Yes                                                | Yes                                                                  | Yes                                                                                           |
|                          | Todd, 2016       | Yes                                                                      | Yes                                                                                    | Yes                                                | Yes                                                                  | Yes                                                                                           |
|                          | Van Bussel, 2019 | Yes                                                                      | Yes                                                                                    | Yes                                                | Yes                                                                  | Yes                                                                                           |
| Van Middelaar, 2018      | Yes              | Yes                                                                      | Yes                                                                                    | Yes                                                | Yes                                                                  |                                                                                               |
| QUANTITATIVE DESCRIPTIVE |                  | Is the sampling strategy relevant to address the research question?      | Is the sample representative of the target population?                                 | Are the measurements appropriate?                  | Is the risk of nonresponse bias low?                                 | Is the statistical analysis appropriate to answer the research question?                      |
|                          | Brinton, 2018    | Yes                                                                      | Yes                                                                                    | Can't tell                                         | No                                                                   | Can't tell                                                                                    |
|                          | Geijteman, 2018  | Yes                                                                      | No                                                                                     | Yes                                                | No                                                                   | Yes                                                                                           |
|                          | Goyal, 2020      | Yes                                                                      | No                                                                                     | Yes                                                | No                                                                   | Yes                                                                                           |
|                          | Qi, 2015         | Yes                                                                      | No                                                                                     | Yes                                                | Yes                                                                  | Yes                                                                                           |
|                          | Tija, 2017       | Yes                                                                      | No                                                                                     | Yes                                                | Yes                                                                  | Yes                                                                                           |
| Van der Ploeg, 2019      | Yes              | No                                                                       | Yes                                                                                    | No                                                 | Yes                                                                  |                                                                                               |

1  
2  
3  
4  
5  
6  
7  
8  
9  
10  
11  
12  
13  
14  
15  
16  
17  
18  
19  
20  
21  
22  
23  
24  
25  
26  
27  
28  
29  
30  
31  
32  
33  
34  
35  
36  
37  
38  
39  
40  
41  
42  
43  
44  
45  
46

| <b>MIXED METHODS</b> |              | <b>Is there an adequate rationale for using a mixed methods design to address the research question?</b> | <b>Are the different components of the study effectively integrated to answer the research question?</b> | <b>Are the outputs of the integration of qualitative and quantitative components adequately interpreted?</b> | <b>Are divergences and inconsistencies between quantitative and qualitative results adequately addressed?</b> | <b>Do the different components of the study adhere to the quality criteria of each tradition of the methods involved?</b> |
|----------------------|--------------|----------------------------------------------------------------------------------------------------------|----------------------------------------------------------------------------------------------------------|--------------------------------------------------------------------------------------------------------------|---------------------------------------------------------------------------------------------------------------|---------------------------------------------------------------------------------------------------------------------------|
|                      | Luymes, 2017 | Yes                                                                                                      | Yes                                                                                                      | Yes                                                                                                          | No                                                                                                            | Yes                                                                                                                       |

For peer review only





## PRISMA 2020 Checklist

| Section and Topic             | Item # | Checklist item                                                                                                                                                                                                                                                                                       | Location where item is reported |
|-------------------------------|--------|------------------------------------------------------------------------------------------------------------------------------------------------------------------------------------------------------------------------------------------------------------------------------------------------------|---------------------------------|
| <b>TITLE</b>                  |        |                                                                                                                                                                                                                                                                                                      |                                 |
| Title                         | 1      | Identify the report as a systematic review.                                                                                                                                                                                                                                                          | p.1                             |
| <b>ABSTRACT</b>               |        |                                                                                                                                                                                                                                                                                                      |                                 |
| Abstract                      | 2      | See the PRISMA 2020 for Abstracts checklist.                                                                                                                                                                                                                                                         | p.2                             |
| <b>INTRODUCTION</b>           |        |                                                                                                                                                                                                                                                                                                      |                                 |
| Rationale                     | 3      | Describe the rationale for the review in the context of existing knowledge.                                                                                                                                                                                                                          | p.4                             |
| Objectives                    | 4      | Provide an explicit statement of the objective(s) or question(s) the review addresses.                                                                                                                                                                                                               | p.4                             |
| <b>METHODS</b>                |        |                                                                                                                                                                                                                                                                                                      |                                 |
| Eligibility criteria          | 5      | Specify the inclusion and exclusion criteria for the review and how studies were grouped for the syntheses.                                                                                                                                                                                          | p.5-6                           |
| Information sources           | 6      | Specify all databases, registers, websites, organisations, reference lists and other sources searched or consulted to identify studies. Specify the date when each source was last searched or consulted.                                                                                            | p.5                             |
| Search strategy               | 7      | Present the full search strategies for all databases, registers and websites, including any filters and limits used.                                                                                                                                                                                 | Suppl. Material 1               |
| Selection process             | 8      | Specify the methods used to decide whether a study met the inclusion criteria of the review, including how many reviewers screened each record and each report retrieved, whether they worked independently, and if applicable, details of automation tools used in the process.                     | p.5-6                           |
| Data collection process       | 9      | Specify the methods used to collect data from reports, including how many reviewers collected data from each report, whether they worked independently, any processes for obtaining or confirming data from study investigators, and if applicable, details of automation tools used in the process. | p.6                             |
| Data items                    | 10a    | List and define all outcomes for which data were sought. Specify whether all results that were compatible with each outcome domain in each study were sought (e.g. for all measures, time points, analyses), and if not, the methods used to decide which results to collect.                        | p.6                             |
|                               | 10b    | List and define all other variables for which data were sought (e.g. participant and intervention characteristics, funding sources). Describe any assumptions made about any missing or unclear information.                                                                                         | p.6                             |
| Study risk of bias assessment | 11     | Specify the methods used to assess risk of bias in the included studies, including details of the tool(s) used, how many reviewers assessed each study and whether they worked independently, and if applicable, details of automation tools used in the process.                                    | p.6                             |
| Effect measures               | 12     | Specify for each outcome the effect measure(s) (e.g. risk ratio, mean difference) used in the synthesis or presentation of results.                                                                                                                                                                  | Not applicable                  |
| Synthesis methods             | 13a    | Describe the processes used to decide which studies were eligible for each synthesis (e.g. tabulating the study intervention characteristics and comparing against the planned groups for each synthesis (item #5)).                                                                                 | Not applicable                  |
|                               | 13b    | Describe any methods required to prepare the data for presentation or synthesis, such as handling of missing summary statistics, or data conversions.                                                                                                                                                | Not applicable                  |
|                               | 13c    | Describe any methods used to tabulate or visually display results of individual studies and syntheses.                                                                                                                                                                                               | Not applicable                  |
|                               | 13d    | Describe any methods used to synthesize results and provide a rationale for the choice(s). If meta-analysis was performed, describe the model(s), method(s) to identify the presence and extent of statistical heterogeneity, and software package(s) used.                                          | Not applicable                  |
|                               | 13e    | Describe any methods used to explore possible causes of heterogeneity among study results (e.g. subgroup analysis, meta-regression).                                                                                                                                                                 | Not applicable                  |
|                               | 13f    | Describe any sensitivity analyses conducted to assess robustness of the synthesized results.                                                                                                                                                                                                         | Not applicable                  |
| Reporting bias assessment     | 14     | Describe any methods used to assess risk of bias due to missing results in a synthesis (arising from reporting biases).                                                                                                                                                                              | Not applicable                  |
| Certainty                     | 15     | Describe any methods used to assess certainty (or confidence) in the body of evidence for an outcome.                                                                                                                                                                                                | Not applicable                  |

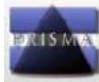

## PRISMA 2020 Checklist

| Section and Topic             | Item # | Checklist item                                                                                                                                                                                                                                                                       | Location where item is reported                                                                              |
|-------------------------------|--------|--------------------------------------------------------------------------------------------------------------------------------------------------------------------------------------------------------------------------------------------------------------------------------------|--------------------------------------------------------------------------------------------------------------|
| assessment                    |        |                                                                                                                                                                                                                                                                                      |                                                                                                              |
| <b>RESULTS</b>                |        |                                                                                                                                                                                                                                                                                      |                                                                                                              |
| Study selection               | 16a    | Describe the results of the search and selection process, from the number of records identified in the search to the number of studies included in the review, ideally using a flow diagram.                                                                                         | p.7 (and Figure 1)                                                                                           |
|                               | 16b    | Cite studies that might appear to meet the inclusion criteria, but which were excluded, and explain why they were excluded.                                                                                                                                                          | Figure 1                                                                                                     |
| Study characteristics         | 17     | Cite each included study and present its characteristics.                                                                                                                                                                                                                            | Table 1 (and suppl. Table S1)                                                                                |
| Risk of bias in studies       | 18     | Present assessments of risk of bias for each included study.                                                                                                                                                                                                                         | p.10                                                                                                         |
| Results of individual studies | 19     | For all outcomes, present, for each study: (a) summary statistics for each group (where appropriate) and (b) an effect estimate and its precision (e.g. confidence/credible interval), ideally using structured tables or plots.                                                     | Not applicable                                                                                               |
| Results of syntheses          | 20a    | For each synthesis, briefly summarise the characteristics and risk of bias among contributing studies.                                                                                                                                                                               | Not applicable                                                                                               |
|                               | 20b    | Present results of all statistical syntheses conducted. If meta-analysis was done, present for each the summary estimate and its precision (e.g. confidence/credible interval) and measures of statistical heterogeneity. If comparing groups, describe the direction of the effect. | Not applicable                                                                                               |
|                               | 20c    | Present results of all investigations of possible causes of heterogeneity among study results.                                                                                                                                                                                       | Not applicable                                                                                               |
|                               | 20d    | Present results of all sensitivity analyses conducted to assess the robustness of the synthesized results.                                                                                                                                                                           | Not applicable                                                                                               |
| Reporting biases              | 21     | Present assessments of risk of bias due to missing results (arising from reporting biases) for each synthesis assessed.                                                                                                                                                              | Not applicable                                                                                               |
| Certainty of evidence         | 22     | Present assessments of certainty (or confidence) in the body of evidence for each outcome assessed.                                                                                                                                                                                  | Not applicable                                                                                               |
| <b>DISCUSSION</b>             |        |                                                                                                                                                                                                                                                                                      |                                                                                                              |
| Discussion                    | 23a    | Provide a general interpretation of the results in the context of other evidence.                                                                                                                                                                                                    | p.20-22                                                                                                      |
|                               | 23b    | Discuss any limitations of the evidence included in the review.                                                                                                                                                                                                                      | p.22-23                                                                                                      |
|                               | 23c    | Discuss any limitations of the review processes used.                                                                                                                                                                                                                                | p.22-23                                                                                                      |
|                               | 23d    | Discuss implications of the results for practice, policy, and future research.                                                                                                                                                                                                       | p.23                                                                                                         |
| <b>OTHER INFORMATION</b>      |        |                                                                                                                                                                                                                                                                                      |                                                                                                              |
| Registration and protocol     | 24a    | Provide registration information for the review, including register name and registration number, or state that the review was not registered.                                                                                                                                       | Not registered                                                                                               |
|                               | 24b    | Indicate where the review protocol can be accessed, or state that a protocol was not prepared.                                                                                                                                                                                       | Registration on PROSPERO (CRD42020221973)                                                                    |
|                               | 24c    | Describe and explain any amendments to information provided at registration or in the protocol.                                                                                                                                                                                      | Adaptation of the framework used to analyze the data to better suit cardiovascular medications deprescribing |
| Support                       | 25     | Describe sources of financial or non-financial support for the review, and the role of the funders or sponsors in the review.                                                                                                                                                        | Swiss National                                                                                               |

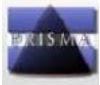

## PRISMA 2020 Checklist

| Section and Topic                              | Item # | Checklist item                                                                                                                                                                                                                             | Location where item is reported                                                                                          |
|------------------------------------------------|--------|--------------------------------------------------------------------------------------------------------------------------------------------------------------------------------------------------------------------------------------------|--------------------------------------------------------------------------------------------------------------------------|
|                                                |        |                                                                                                                                                                                                                                            | Science Foundation Grant IICT 33IC30-193052; grant from the College of General Internal Medicine (Fribourg, Switzerland) |
| Competing interests                            | 26     | Declare any competing interests of review authors.                                                                                                                                                                                         | None                                                                                                                     |
| Availability of data, code and other materials | 27     | Report which of the following are publicly available and where they can be found: template data collection forms; data extracted from included studies; data used for all analyses; analytic code; any other materials used in the review. | Available on demand                                                                                                      |

From: Page MJ, McKenzie JE, Bossuyt PM, Boutron I, Hoffmann TC, Mulrow CD, et al. The PRISMA 2020 statement: an updated guideline for reporting systematic reviews. *BMJ* 2021;372:n71. doi: 10.1136/bmj.n71

For more information, visit: <http://www.prisma-statement.org/>
