# Supplementary material for: Barriers and facilitators to deprescribing of cardiovascular medications: a systematic review
Source: PubMed Central journal article supplement — BMJ Open. 2022 Dec 22;12(12):e061686. doi: 10.1136/bmjopen-2022-061686 (PMC9791375; doi:10.1136/bmjopen-2022-061686), 2022-12-22
Supplement: bmjopen-2022-061686supp001.pdf [file bmjopen-2022-061686supp001.pdf]

## Supplemental Material S1: Search strategy barriers and facilitators to deprescribing cardiovascular medications

OID/MEDLINE 2021.11.15: 1,682 results

### Concept 1: cardiovascular medications

1. exp cardiovascular agents/
2. exp Hydroxymethylglutaryl-CoA Reductase Inhibitors/
3. ("hmg coa reductase inhibitors" or "hmg-coa reductase inhibitors" or "hydroxymethylglutaryl coa reductase inhibitors" or "hydroxymethylglutaryl-coa inhibitors" or "hydroxymethylglutaryl coa reductase inhibitors" or "hydroxymethylglutaryl-coenzyme a inhibitors" or "inhibitors, hmg coa reductase" or "inhibitors, hmg-coa reductase" or "inhibitors, hydroxymethylglutaryl coa" or "inhibitors, hydroxymethylglutaryl coenzyme a" or "inhibitors, hydroxymethylglutaryl-coa" or "inhibitors, hydroxymethylglutaryl-coa reductase" or "inhibitors, hydroxymethylglutaryl-coenzyme a" or "reductase inhibitors, hmg-coa" or "reductase inhibitors, hydroxymethylglutaryl-coa" or "hmg-coa statins" or statins or "statins, hmg coa" or "statins, hmg-coa" or "Cardiovascular medic\*" or "cardiovascular drug\*" or "cardiovascular preparation\*" or "cardiovascular medic\*" OR "cardiovascular prescri\*" or "cardiovascular therapeutic\*" or "cardiovascular treat\*" or "cardiometabolic medic\*" or "cardiometabolic drug\*" or "cardiometabolic agent\*" or "cardiometabolic preparation\*" or "cardiometabolic prescri\*" or "cardiometabolic therapeutic\*" or "cardiometabolic treat\*" or "lipid-lowering treat\*" or "lipid-lowering medic\*" or "lipid-lowering drug\*" or "lipid-lowering agent\*" or "lipid-lowering preparation\*" or "lipid-lowering prescri\*" or "lipid-lowering therapeutic\*").ab,ti.
4. "cardiovascular disease".ab,ti.
5. \*cardiovascular diseases/
6. prevention.ab,ti.
7. \*primary prevention/
8. \*secondary prevention/
9. 4 or 5
10. 6 or 7 or 8
11. 9 and 10

### Concept 2: prescribing / deprescribing

12. exp Deprescriptions/
13. exp Withholding Treatment/
14. exp Potentially Inappropriate Medication List/
15. exp Inappropriate Prescribing/
16. (reduce or reducing or reduction or reduced or withdraw\* or withhold\* or stop or stopped or stopping or elimin\* or tapering or taper or cease or ceasing or ceased or cessation\* or de-intensif\* or deintensif\* or deprescribing or deprescri\* or "de-prescribing" or "de-prescrib\*" or "de-implementation\*" or "de-implement\*" or deimplement\* or discontinue\* or discontinuation\* or curb or curbing or curbed).ab,ti.

### Concept 3: barriers and facilitators

17. \*patient acceptance of health care/
18. \*patient preference/
19. \*attitude to health/
20. \*physician-patient relations/
21. (barriers or barrier or issues or issue or problems or problem or hinder or hindered or hinders or facilitate or facilitates or facilitated or facilitator or facilitators or ease or easy or easier or difficult or difficulty or willingness or belief or believe\* or preference\* or willing or dialog\* or conversation\* or decision or decide\* or deciding or motivation or conversation or acceptance or acceptability).ti.
22. (perceptions or perception or behaviors or behavior or behaviour or behaviours or attitudes or attitude or input or inputs or experience or experiences or value or values or perspective\* or expectation\* or choice or choices or empower\* or choose\* or choosing or acceptance or acceptability or knowledge\* or preference\* or motivation\* or intention\* or involv\* or engag\* or consult\* or interact\* or involv\* or satisfaction or satisfied or discuss\* or discussion\*).ti.
23. (GP\* or pharmacist\* or physician\* or provider\* or patient\* or "general practitioner\*" or patient\* or adult\* or relative\* or caregiver\*).ti.
24. 22 and 23
25. 1 or 2 or 3 or 11
26. 12 or 13 or 14 or 15 or 16
27. 17 or 18 or 19 or 20 or 21 or 24
28. 25 and 26 and 27
29. limit 28 to (English language and yr="2003-Current")
30. (child or kid or kids or childhood or children or pediatric or paediatric or pediatrics or paediatrics or mouse or mice or animals or animal).ab,ti.
31. 29 not 30

EMBASE 2021.11.15: 3,351 results

Concept 1: cardiovascular medications

1. 'cardiovascular agent'/exp
2. 'hydroxymethylglutaryl coenzyme A reductase inhibitor'/exp
3. ("hmg coa reductase inhibitors" or "hmg-coa reductase inhibitors" or "hydroxymethylglutaryl coa reductase inhibitors" or "hydroxymethylglutaryl-coa inhibitors" or "hydroxymethylglutaryl-coa reductase inhibitors" or "hydroxymethylglutaryl-coenzyme a inhibitors" or "inhibitors, hmg coa reductase" or "inhibitors, hmg-coa reductase" or "inhibitors, hydroxymethylglutaryl coa" or "inhibitors, hydroxymethylglutaryl-coenzyme a" or "inhibitors, hydroxymethylglutaryl-coa" or "inhibitors, hydroxymethylglutaryl-coa reductase" or "inhibitors, hydroxymethylglutaryl-coenzyme a" or "reductase inhibitors, hmg-coa" or "reductase inhibitors, hydroxymethylglutaryl-coa" or "hmg-coa statins" or statins or "statins, hmg coa" or "statins, hmg-coa" or "Cardiovascular medic\*" or "cardiovascular drug\*" or "cardiovascular preparation\*" or "cardiovascular medic\*" OR "cardiovascular prescri\*" or "cardiovascular therapeutic\*" or "cardiovascular treat\*" or "cardiometabolic medic\*" or "cardiometabolic drug\*" or "cardiometabolic agent\*" or "cardiometabolic preparation\*" or "cardiometabolic prescrib\*" or "cardiometabolic therapeutic\*" or "cardiometabolic treat\*" or "lipid-lowering treat\*" or "lipid-lowering medic\*" or "lipid-lowering drug\*" or "lipid-lowering agent\*" or "lipid-lowering preparation\*" or "lipid-lowering prescrib\*" or "lipid-lowering therapeutic\*"):ab,ti
4. "cardiovascular disease":ab,ti
5. 'cardiovascular diseases'/mj
6. prevention:ab,ti
7. 'primary prevention'/mj
8. 'secondary prevention'/mj
9. 4 or 5
10. 6 or 7 or 8
11. 9 and 10

Concept 2: prescribing / deprescribing

12. 'deprescription'/mj
13. 'treatment withdrawal'/mj
14. 'potentially inappropriate medication'/mj
15. 'inappropriate prescribing'/mj
16. (reduce or reducing or reduction or reduced or withdraw\* or withhold\* or stop or stopped or stopping or elimin\* or tapering or taper or cease or ceasing or ceased or cessation\* or de-intensif\* or deintensif\* or deprescribing or deprescrib\* or "de-prescribing" or "de-prescrib\*" or "de-implementation\*" or "de-implement\*" or deimplement\* or discontinue\* or discontinuation\* or curb or curbing or curbed):ab,ti

Concept 3: barriers and facilitators

17. 'patient attitude'/mj
18. 'patient preference'/mj
19. 'attitude to health'/mj
20. 'doctor patient relationship'/mj
21. (barriers or barrier or issues or issue or problems or problem or hinder or hindered or hinders or facilitate or facilitates or facilitated or facilitator or facilitators or ease or easy or easier or difficult or difficulty or willingness or belief or believe\* or preference\* or willing or dialog\* or conversation\* or decision or decide\* or deciding or motivation or conversation or acceptance or acceptability):ti
22. (perceptions or perception or behaviors or behavior or behaviour or behaviours or attitudes or attitude or input or inputs or experience or experiences or value or values or perspective\* or expectation\* or choice or choices or empower\* or choose\* or choosing or acceptance or acceptability or knowledge\* or preference\* or motivation\* or intention\* or involv\* or engag\* or consult\* or interact\* or involv\* or satisfaction or satisfied or discuss\* or discussion\*):ti
23. (GP\* or pharmacist\* or physician\* or provider\* or patient\* or "general practitioner\*" or patient\* or adult\* or relative\* or caregiver\*):ti
24. #22 AND #23
25. #1 OR #2 OR #3 OR #11
26. #12 OR #13 OR #14 OR #15 OR #16
27. #17 OR #18 OR #19 OR #20 OR #21 OR #24
28. #25 AND #26 AND #27
29. (child or kid or kids or childhood or children or pediatric or paediatric or pediatrics or paediatrics or mouse or mice or animals or animal):ti,ab
30. #25 AND #26 AND #27 NOT #29 AND ([article]/lim OR [review]/lim) AND [english]/lim AND ([embase]/lim OR [embase classic]/lim OR [pubmed-not-medline]/lim) AND [2003-2020]/py
