# Supplementary material for: Barriers and facilitators to deprescribing of cardiovascular medications: a systematic review
Source: PubMed Central journal article supplement — BMJ Open. 2022 Dec 22;12(12):e061686. doi: 10.1136/bmjopen-2022-061686 (PMC9791375; doi:10.1136/bmjopen-2022-061686), 2022-12-22
Supplement: bmjopen-2022-061686supp002.pdf [file bmjopen-2022-061686supp002.pdf]

## Supplemental Material S2: study characteristics

| PATIENTS AND INFORMAL CAREGIVERS | First author                | Setting                                                                                  | Design                   | Data collection mean         | N population                 | Age                                                                                     | No of medication taken                                                                                               | Studied CVM(s)                                                                     | Prevention type     | Life-limiting disease |
|----------------------------------|-----------------------------|------------------------------------------------------------------------------------------|--------------------------|------------------------------|------------------------------|-----------------------------------------------------------------------------------------|----------------------------------------------------------------------------------------------------------------------|------------------------------------------------------------------------------------|---------------------|-----------------------|
|                                  | Benson, 2005 (UK)           | Primary care                                                                             | Qualitative              | Interviews                   | 38 patients                  | 18% <50 years<br>16% 50-59 years<br>29% 60-69 years<br>24% 70-79 years<br>13% ≥80 years | Antihypertensives:<br>50%: 1; 39%: 2; 11%: ≥3<br>Non-antihypertensives:<br>34%: 0; 18%: 2, 13%: 3;<br>11%: 4; 8%: ≥5 | Antihypertensives                                                                  | Unknown             | No                    |
|                                  | Brinton, 2018 (USA)         | Online panels                                                                            | Quantitative descriptive | Survey                       | 5014 patients                | Mean age: 64                                                                            | 99% of current statin users taking a mean of 7.7 meds                                                                | Statin                                                                             | Primary & secondary | No                    |
|                                  | Crutzen, 2020 (Netherlands) | Primary care                                                                             | Qualitative              | FGs                          | 17 patients<br>1 caregiver   | Median age:<br>FG1: 78<br>FG2: 77.5                                                     | FG1: 6: 5-10; 2: >10<br>FG2: 4: 5-10; 5: >10                                                                         | Cardiometabolic medication                                                         | Primary & secondary | No                    |
|                                  | Goyal, 2020 (USA)           | Quaternary care                                                                          | Qualitative              | Interviews                   | 10 patients                  | Median age: 80                                                                          | Median of 12                                                                                                         | β-blockers                                                                         | Primary & secondary | No                    |
|                                  | Jansen, 2019 (Australia)    | Primary care                                                                             | Qualitative              | Interviews                   | 30 patients                  | 20: 75-79 years<br>4: 80-84 years<br>5: 85-89 years<br>1: ≥90 years                     | Unknown                                                                                                              | Preventive CV medication                                                           | Primary & secondary | No                    |
|                                  | Luymes, 2017 (Netherlands)  | Primary care                                                                             | Mixed methods            | Q-sorts<br>Group discussions | 33 patients                  | Mean age:<br>- Q-Sort: 57.1<br>- Discussion: 57.7                                       | Unknown                                                                                                              | LLTs<br>Antihypertensives                                                          | Primary             | No                    |
|                                  | Pickering, 2020 (USA)       | Claude D. Pepper Older Americans Independence Center Research Registry; Pitt+Me registry | Qualitative              | FGs                          | 16 patients<br>17 caregivers | Patients ≥ 65<br>Caregivers 22-69                                                       | ≥ 5 prescribed                                                                                                       | Unspecified (identified: antihypertensives, statins, antiplatelets, antidiabetics) | Primary & secondary | No                    |
|                                  | Qi, 2015 (Australia)        | Tertiary care                                                                            | Quantitative descriptive | Survey                       | 180 patients                 | Median age: 78                                                                          | Median of 8                                                                                                          | Regular medications<br>Statins                                                     | Primary & secondary | No                    |
|                                  | Tija, 2017 (USA)            | PCRC member sites                                                                        | Quantitative descriptive | Survey                       | 297 patients                 | Mean age: 71.8                                                                          | Mean of 11.5                                                                                                         | Statin                                                                             | Primary & secondary | Yes                   |

|      |                                |                             |                          |                             |                                                                                                                       |                                                                             |                                                |                               |                                                                                  |                        |                              |
|------|--------------------------------|-----------------------------|--------------------------|-----------------------------|-----------------------------------------------------------------------------------------------------------------------|-----------------------------------------------------------------------------|------------------------------------------------|-------------------------------|----------------------------------------------------------------------------------|------------------------|------------------------------|
|      | Van Bussel, 2019 (Netherlands) | Primary care                | Qualitative              | Interviews                  | 15 patients                                                                                                           | Mean age: 81                                                                | Median of 4 with median of 2 antihypertensives | Antihypertensives             | Primary                                                                          | No                     |                              |
| HCPs | <b>First author</b>            | <b>Setting</b>              | <b>Design</b>            | <b>Data collection mean</b> | <b>N population</b>                                                                                                   | <b>Years of experiences</b>                                                 | <b>HCPs' patients' characteristics</b>         |                               |                                                                                  |                        |                              |
|      |                                |                             |                          |                             |                                                                                                                       |                                                                             | <b>Age</b>                                     | <b>No of medication taken</b> | <b>Studied CVM(s)</b>                                                            | <b>Prevention type</b> | <b>Life-limiting disease</b> |
|      | Ailabouni, 2016 (New Zealand)  | Primary care                | Qualitative              | Interviews                  | 10 GPs                                                                                                                | Unknown                                                                     | 83                                             | 17                            | Antiplatelets, statin, antidiabetics, diuretics, $\beta$ -blocker, ACE inhibitor | Secondary              | No                           |
|      | Ailabouni, 2016 (New Zealand)  | Primary care                | Qualitative              | Interviews                  | 10 GPs                                                                                                                | 2-32                                                                        | Unspecified (older patients)                   | Unknown                       | Unspecified (statin and aspirin mentioned)                                       | Unknown                | No                           |
|      | Anderson, 2017 (Australia)     | Primary care                | Qualitative              | FGs                         | 32 GPs<br>15 CPs                                                                                                      | GPs: median of 18<br>CP: median of 9                                        | Unknown                                        | Unknown                       | Unspecified (statin mentioned)                                                   | Unknown                | No                           |
|      | Geijteman, 2018 (Netherlands)  | Primary & secondary care    | Quantitative descriptive | Survey                      | 174 GPs<br>147 clinical specialists (medical oncologists, geriatricians, cardiologists, pulmonologists, neurologists) | 203: 0-9 years<br>56: 10-19 years<br>40: 20-29 years<br>18: $\geq$ 30 years | 88                                             | 10                            | ACE inhibitor, statin, anticoagulant, diuretic, antidiabetic                     | Secondary              | Yes                          |
|      | Goyal, 2020 (USA)              | Secondary and tertiary care | Quantitative descriptive | Survey                      | 184 geriatricians<br>182 general internists<br>87 cardiologists                                                       | 86: 1-10 years<br>99: 11-20 years<br>138: 21-30 years<br>130: > 30 years    | 79                                             | Unspecified (several)         | 4 CV medications                                                                 | Unknown                | Yes and no                   |

|                           |                                    |                          |                          |                                        |                                                                                                                          |                                                                     |                                        |                                |                                                                     |                        |                              |
|---------------------------|------------------------------------|--------------------------|--------------------------|----------------------------------------|--------------------------------------------------------------------------------------------------------------------------|---------------------------------------------------------------------|----------------------------------------|--------------------------------|---------------------------------------------------------------------|------------------------|------------------------------|
|                           | Green, 2019 (USA)                  | Primary & secondary care | Qualitative              | Interviews                             | 19 physicians<br>2 nurse practitioners (family, internal & geriatric medicine, urogynecology, endocrinology, cardiology) | Mean of 14                                                          | Unspecified (older patients)           | Unknown                        | Unspecified (oral anticoagulants, antidiabetics, statins mentioned) | Unknown                | Yes                          |
|                           | Jansen, 2017 (Australia)           | Primary care             | Qualitative              | Interviews                             | 25 GPs                                                                                                                   | 2: < 10 years<br>4: 10-19 years<br>7: 20-29 years<br>12: ≥ 30 years | ≥75                                    | Unknown                        | Preventive CV medication                                            | Primary                | No                           |
|                           | Thompson, 2020 (Denmark)           | Primary care             | Qualitative              | Interviews                             | 11 GPs                                                                                                                   | Mean of 9                                                           | ≥ 80                                   | Unknown                        | Statin                                                              | Unknown                | Yes and no                   |
|                           | Van Middelaar, 2020 (Netherlands)  | Primary care             | Qualitative              | Interviews                             | 15 GPs                                                                                                                   | 4: 0-5 years<br>3: 5-10 years<br>3: 10-15 years<br>5: > 15 years    | Unspecified (older patients)           | Unknown                        | Antihypertensives                                                   | Unknown                | Yes and no                   |
|                           | Van der Ploeg, 2018 (30 countries) | Primary care             | Quantitative descriptive | Survey                                 | 2250 GPs                                                                                                                 | 358: < 5 years<br>1024: 5-20 years<br>865: > 20 years               | ≥ 80                                   | Unknown                        | Statin                                                              | Primary and secondary  | Yes and no                   |
| <b>PATIENTS, INFORMAL</b> | <b>First author</b>                | <b>Setting</b>           | <b>Design</b>            | <b>Data collection mean</b>            | <b>N population</b>                                                                                                      | <b>Years of experiences</b>                                         | <b>HCPs' patients' characteristics</b> |                                |                                                                     |                        |                              |
|                           |                                    |                          |                          |                                        |                                                                                                                          |                                                                     | <b>Age</b>                             | <b>No of medication taken</b>  | <b>Studied CVM(s)</b>                                               | <b>Prevention type</b> | <b>Life-limiting disease</b> |
|                           | Luymes, 2016 (Netherlands)         | Primary care             | Qualitative              | Audiotaped deprescribing consultations | 10 GPs<br>49 patients                                                                                                    | Unknown                                                             | Median of 55.4                         | 27: < 2 kinds<br>22: ≥ 2 kinds | Antihypertensives, LLTs                                             | Primary                | No                           |

|  |                 |                                                     |             |            |                                                                                                     |         |                                                        |         |                                                                            |         |     |
|--|-----------------|-----------------------------------------------------|-------------|------------|-----------------------------------------------------------------------------------------------------|---------|--------------------------------------------------------|---------|----------------------------------------------------------------------------|---------|-----|
|  | Todd, 2016 (UK) | Specialist palliative care unit at a daycare centre | Qualitative | Interviews | 12 patients<br>12 informal caregivers<br>3 palliative consultants<br>3 nurse practitioners<br>6 GPs | Unknown | 1: < 50<br>3: 51-60<br>3: 61-70<br>3: 71-79<br>2: ≥ 80 | Unknown | Unspecified (preventive medications, including statins, antihypertensives) | Unknown | Yes |
|--|-----------------|-----------------------------------------------------|-------------|------------|-----------------------------------------------------------------------------------------------------|---------|--------------------------------------------------------|---------|----------------------------------------------------------------------------|---------|-----|

**Legend:** CPs: community pharmacists; CV: cardiovascular; CVM: cardiovascular medications; FGs: focus groups; GPs: general practitioners; HCPs: healthcare providers; LLTs: lipid-lowering therapies; PCRC: Palliative Care Research Cooperation Group
