# Supplementary material for: Barriers and facilitators to deprescribing of cardiovascular medications: a systematic review
Source: PubMed Central journal article supplement — BMJ Open. 2022 Dec 22;12(12):e061686. doi: 10.1136/bmjopen-2022-061686 (PMC9791375; doi:10.1136/bmjopen-2022-061686), 2022-12-22
Supplement: bmjopen-2022-061686supp003.pdf [file bmjopen-2022-061686supp003.pdf]

## Supplemental Material S3: Details of study quality appraisal

|                                 | Authors             | Is the qualitative approach appropriate to answer the research question? | Are the qualitative data collection methods adequate to address the research question? | Are the findings adequately derived from the data? | Is the interpretation of results sufficiently substantiated by data? | Is there coherence between qualitative data sources, collection, analysis and interpretation? |
|---------------------------------|---------------------|--------------------------------------------------------------------------|----------------------------------------------------------------------------------------|----------------------------------------------------|----------------------------------------------------------------------|-----------------------------------------------------------------------------------------------|
|                                 | <b>QUALITATIVE</b>  | Ailabouni, 2016                                                          | Can't tell                                                                             | Yes                                                | Yes                                                                  | Can't tell                                                                                    |
| Ailabouni, 2016                 |                     | Yes                                                                      | Yes                                                                                    | Yes                                                | Yes                                                                  | Yes                                                                                           |
| Anderson, 2017                  |                     | Yes                                                                      | Yes                                                                                    | Yes                                                | Yes                                                                  | Yes                                                                                           |
| Benson, 2005                    |                     | Yes                                                                      | Yes                                                                                    | Yes                                                | Yes                                                                  | Yes                                                                                           |
| Crutzen, 2020                   |                     | Yes                                                                      | Yes                                                                                    | Yes                                                | Yes                                                                  | Yes                                                                                           |
| Goyal, 2020                     |                     | Yes                                                                      | Yes                                                                                    | Yes                                                | Yes                                                                  | Yes                                                                                           |
| Green, 2019                     |                     | Yes                                                                      | Yes                                                                                    | Yes                                                | Yes                                                                  | Yes                                                                                           |
| Jansen, 2017                    |                     | Yes                                                                      | Yes                                                                                    | Yes                                                | Yes                                                                  | Yes                                                                                           |
| Jansen, 2019                    |                     | Yes                                                                      | Yes                                                                                    | Yes                                                | Yes                                                                  | Yes                                                                                           |
| Luymes, 2016                    |                     | Yes                                                                      | Yes                                                                                    | Yes                                                | Yes                                                                  | Yes                                                                                           |
| Pickering, 2020                 |                     | Yes                                                                      | Yes                                                                                    | Yes                                                | Yes                                                                  | Yes                                                                                           |
| Thompson 2019                   |                     | Yes                                                                      | Yes                                                                                    | Yes                                                | Yes                                                                  | Yes                                                                                           |
| Todd, 2016                      |                     | Yes                                                                      | Yes                                                                                    | Yes                                                | Yes                                                                  | Yes                                                                                           |
| Van Bussel, 2019                |                     | Yes                                                                      | Yes                                                                                    | Yes                                                | Yes                                                                  | Yes                                                                                           |
| Van Middelaar, 2018             |                     | Yes                                                                      | Yes                                                                                    | Yes                                                | Yes                                                                  | Yes                                                                                           |
| <b>QUANTITATIVE DESCRIPTIVE</b> |                     | Is the sampling strategy relevant to address the research question?      | Is the sample representative of the target population?                                 | Are the measurements appropriate?                  | Is the risk of nonresponse bias low?                                 | Is the statistical analysis appropriate to answer the research question?                      |
|                                 | Brinton, 2018       | Yes                                                                      | Yes                                                                                    | Can't tell                                         | No                                                                   | Can't tell                                                                                    |
|                                 | Geijteman, 2018     | Yes                                                                      | No                                                                                     | Yes                                                | No                                                                   | Yes                                                                                           |
|                                 | Goyal, 2020         | Yes                                                                      | No                                                                                     | Yes                                                | No                                                                   | Yes                                                                                           |
|                                 | Qi, 2015            | Yes                                                                      | No                                                                                     | Yes                                                | Yes                                                                  | Yes                                                                                           |
|                                 | Tija, 2017          | Yes                                                                      | No                                                                                     | Yes                                                | Yes                                                                  | Yes                                                                                           |
|                                 | Van der Ploeg, 2019 | Yes                                                                      | No                                                                                     | Yes                                                | No                                                                   | Yes                                                                                           |

| <b>MIXED METHODS</b> |              | <b>Is there an adequate rationale for using a mixed methods design to address the research question?</b> | <b>Are the different components of the study effectively integrated to answer the research question?</b> | <b>Are the outputs of the integration of qualitative and quantitative components adequately interpreted?</b> | <b>Are divergences and inconsistencies between quantitative and qualitative results adequately addressed?</b> | <b>Do the different components of the study adhere to the quality criteria of each tradition of the methods involved?</b> |
|----------------------|--------------|----------------------------------------------------------------------------------------------------------|----------------------------------------------------------------------------------------------------------|--------------------------------------------------------------------------------------------------------------|---------------------------------------------------------------------------------------------------------------|---------------------------------------------------------------------------------------------------------------------------|
|                      | Luymes, 2017 | Yes                                                                                                      | Yes                                                                                                      | Yes                                                                                                          | No                                                                                                            | Yes                                                                                                                       |
